# Supplementary material for: A co-crystal of 2-(1′-pyrenyl)-4,4,5,5-tetramethyl-4,5-dihydro-1H-imidazole-3-oxide-1-oxyl with octafluoronaphthalene
Source: Royal Society of Chemistry journal article supplement (doi:10.1039/c2ce26621k), 2012-12-06
Supplement: c2ce26621k.mryx [file c2ce26621k.mryx]

Archive with 1 entries (1 files):
- c2ce26621k.mryx.out
