# Supplementary material for: A co-crystal of 2-(1′-pyrenyl)-4,4,5,5-tetramethyl-4,5-dihydro-1H-imidazole-3-oxide-1-oxyl with octafluoronaphthalene
Source: Royal Society of Chemistry journal article supplement (doi:10.1039/c2ce26621k), 2012-12-06
Supplement: c2ce26621k.mryx [file c2ce26621k.mryx › c2ce26621k.mryx.out]

<!DOCTYPE CCDC_XML>
<All>
 <graphics_crystal type="Container" >
  <count type="int" >1</count>
  <item type="Handle" >
   <serial_number type="int" >1</serial_number>
   <value type="GraphicsCrystal" >
    <graphics_crystal_memento type="GraphicsCrystalMemento" >
     <graphics_object type="GraphicsObject" >
      <color type="RGBA" >
       <red type="float" >1</red>
       <green type="float" >1</green>
       <blue type="float" >1</blue>
       <alpha type="float" >1</alpha>
      </color>
      <style type="GraphicsObject::RenderingStyle" >
       <enumerator type="int" >1</enumerator>
      </style>
      <label type="string" >pml029_0m</label>
      <options type="int" >851971</options>
     </graphics_object>
     <crystal type="Handle" >
      <serial_number type="int" >2</serial_number>
      <value type="CrystalStructureViewMemento" >
       <crystal_structure type="Handle" >
        <serial_number type="int" >3</serial_number>
        <value type="ConcreteCrystalStructure" >
         <cell type="Handle" >
          <serial_number type="int" >4</serial_number>
          <value type="Cell" >
           <a type="UncertainValue" >
            <value type="float" >13.883800000000001</value>
            <uncertainty type="Uncertainty" >
             <precision type="int" >4</precision>
             <uncertainty type="int" >8</uncertainty>
            </uncertainty>
           </a>
           <b type="UncertainValue" >
            <value type="float" >10.103899999999999</value>
            <uncertainty type="Uncertainty" >
             <precision type="int" >4</precision>
             <uncertainty type="int" >6</uncertainty>
            </uncertainty>
           </b>
           <c type="UncertainValue" >
            <value type="float" >18.7348</value>
            <uncertainty type="Uncertainty" >
             <precision type="int" >4</precision>
             <uncertainty type="int" >11</uncertainty>
            </uncertainty>
           </c>
           <alpha type="UncertainValue" >
            <value type="float" >1.5707963267948966</value>
            <uncertainty type="Uncertainty" >
             <precision type="int" >2</precision>
             <uncertainty type="int" >0</uncertainty>
            </uncertainty>
           </alpha>
           <beta type="UncertainValue" >
            <value type="float" >1.8696839611989255</value>
            <uncertainty type="Uncertainty" >
             <precision type="int" >3</precision>
             <uncertainty type="int" >1</uncertainty>
            </uncertainty>
           </beta>
           <gamma type="UncertainValue" >
            <value type="float" >1.5707963267948966</value>
            <uncertainty type="Uncertainty" >
             <precision type="int" >2</precision>
             <uncertainty type="int" >0</uncertainty>
            </uncertainty>
           </gamma>
           <spacegroup type="Spacegroup" >
            <number type="int" >14</number>
            <name type="string" >P21/n</name>
            <setting type="int" >6</setting>
            <system type="Spacegroup::System" >
             <enumerator type="int" >0</enumerator>
            </system>
            <crystal_symmetry_operators type="Handle" >
             <serial_number type="int" >5</serial_number>
             <value type="Container" >
              <count type="int" >4</count>
              <item type="CrystalSymmetryOperator" >
               <rotation type="Matrix" >
                <matrix type="Vector" >
                 <vector type="Container" >
                  <count type="int" >9</count>
                  <item type="int" >1</item>
                  <item type="int" >0</item>
                  <item type="int" >0</item>
                  <item type="int" >0</item>
                  <item type="int" >1</item>
                  <item type="int" >0</item>
                  <item type="int" >0</item>
                  <item type="int" >0</item>
                  <item type="int" >1</item>
                 </vector>
                </matrix>
               </rotation>
               <translation type="Vector" >
                <vector type="Container" >
                 <count type="int" >3</count>
                 <item type="float" >0</item>
                 <item type="float" >0</item>
                 <item type="float" >0</item>
                </vector>
               </translation>
              </item>
              <item type="CrystalSymmetryOperator" >
               <rotation type="Matrix" >
                <matrix type="Vector" >
                 <vector type="Container" >
                  <count type="int" >9</count>
                  <item type="int" >-1</item>
                  <item type="int" >0</item>
                  <item type="int" >0</item>
                  <item type="int" >0</item>
                  <item type="int" >1</item>
                  <item type="int" >0</item>
                  <item type="int" >0</item>
                  <item type="int" >0</item>
                  <item type="int" >-1</item>
                 </vector>
                </matrix>
               </rotation>
               <translation type="Vector" >
                <vector type="Container" >
                 <count type="int" >3</count>
                 <item type="float" >0.5</item>
                 <item type="float" >0.5</item>
                 <item type="float" >0.5</item>
                </vector>
               </translation>
              </item>
              <item type="CrystalSymmetryOperator" >
               <rotation type="Matrix" >
                <matrix type="Vector" >
                 <vector type="Container" >
                  <count type="int" >9</count>
                  <item type="int" >-1</item>
                  <item type="int" >0</item>
                  <item type="int" >0</item>
                  <item type="int" >0</item>
                  <item type="int" >-1</item>
                  <item type="int" >0</item>
                  <item type="int" >0</item>
                  <item type="int" >0</item>
                  <item type="int" >-1</item>
                 </vector>
                </matrix>
               </rotation>
               <translation type="Vector" >
                <vector type="Container" >
                 <count type="int" >3</count>
                 <item type="float" >0</item>
                 <item type="float" >0</item>
                 <item type="float" >0</item>
                </vector>
               </translation>
              </item>
              <item type="CrystalSymmetryOperator" >
               <rotation type="Matrix" >
                <matrix type="Vector" >
                 <vector type="Container" >
                  <count type="int" >9</count>
                  <item type="int" >1</item>
                  <item type="int" >0</item>
                  <item type="int" >0</item>
                  <item type="int" >0</item>
                  <item type="int" >-1</item>
                  <item type="int" >0</item>
                  <item type="int" >0</item>
                  <item type="int" >0</item>
                  <item type="int" >1</item>
                 </vector>
                </matrix>
               </rotation>
               <translation type="Vector" >
                <vector type="Container" >
                 <count type="int" >3</count>
                 <item type="float" >0.5</item>
                 <item type="float" >0.5</item>
                 <item type="float" >0.5</item>
                </vector>
               </translation>
              </item>
             </value>
            </crystal_symmetry_operators>
           </spacegroup>
           <frac_to_orth type="Matrix" >
            <matrix type="Vector" >
             <vector type="Container" >
              <count type="int" >9</count>
              <item type="float" >13.883800000000001</item>
              <item type="float" >6.1868543969524709e-16</item>
              <item type="float" >-5.516599384774084</item>
              <item type="float" >0</item>
              <item type="float" >10.103899999999999</item>
              <item type="float" >1.4849699315703836e-15</item>
              <item type="float" >0</item>
              <item type="float" >0</item>
              <item type="float" >17.904185607502797</item>
             </vector>
            </matrix>
           </frac_to_orth>
           <orth_to_frac type="Matrix" >
            <matrix type="Vector" >
             <vector type="Container" >
              <count type="int" >9</count>
              <item type="float" >0.072026390469468002</item>
              <item type="float" >-4.4103444271285712e-18</item>
              <item type="float" >0.022192617417061317</item>
              <item type="float" >0</item>
              <item type="float" >0.098971684201150045</item>
              <item type="float" >-8.208693672947584e-18</item>
              <item type="float" >0</item>
              <item type="float" >0</item>
              <item type="float" >0.055852861555509531</item>
             </vector>
            </matrix>
           </orth_to_frac>
           <valid type="bool" >true</valid>
          </value>
         </cell>
         <molecule type="Handle" >
          <serial_number type="int" >6</serial_number>
          <value type="Molecule3d" >
           <atoms type="Container" >
            <count type="int" >75</count>
            <item type="Handle" >
             <serial_number type="int" >7</serial_number>
             <value type="Atom3d" >
              <element type="Element" >
               <code type="char" >64</code>
              </element>
              <formal_charge type="int" >0</formal_charge>
              <radius type="float" >0.68000000000000005</radius>
              <label type="string" >O1</label>
              <site type="Handle" >
               <serial_number type="int" >8</serial_number>
               <value type="Site" >
                <orthogonal type="Point" >
                 <coordinates type="Vector" >
                  <vector type="Container" >
                   <count type="int" >3</count>
                   <item type="float" >5.0207183255952019</item>
                   <item type="float" >3.5710213770000006</item>
                   <item type="float" >5.4011556722153689</item>
                  </vector>
                 </coordinates>
                </orthogonal>
                <fractional type="Point" >
                 <coordinates type="Vector" >
                  <vector type="Container" >
                   <count type="int" >3</count>
                   <item type="float" >0.48148999999999997</item>
                   <item type="float" >0.35343000000000002</item>
                   <item type="float" >0.30166999999999999</item>
                  </vector>
                 </coordinates>
                </fractional>
                <uncertain_value type="UncertainValue" >
                 <value type="float" >1</value>
                 <uncertainty type="Uncertainty" >
                  <precision type="int" >0</precision>
                  <uncertainty type="int" >0</uncertainty>
                 </uncertainty>
                </uncertain_value>
                <uncertainty type="Handle" >
                 <serial_number type="int" >9</serial_number>
                 <value type="Container" >
                  <count type="int" >3</count>
                  <item type="Uncertainty" >
                   <precision type="int" >5</precision>
                   <uncertainty type="int" >11</uncertainty>
                  </item>
                  <item type="Uncertainty" >
                   <precision type="int" >5</precision>
                   <uncertainty type="int" >13</uncertainty>
                  </item>
                  <item type="Uncertainty" >
                   <precision type="int" >5</precision>
                   <uncertainty type="int" >8</uncertainty>
                  </item>
                 </value>
                </uncertainty>
                <adps type="Handle" >
                 <serial_number type="int" >10</serial_number>
                 <value type="AtomicDisplacementParameters" >
                  <uvalues type="Container" >
                   <count type="int" >6</count>
                   <item type="UncertainValue" >
                    <value type="float" >0.038399999999999997</value>
                    <uncertainty type="Uncertainty" >
                     <precision type="int" >4</precision>
                     <uncertainty type="int" >8</uncertainty>
                    </uncertainty>
                   </item>
                   <item type="UncertainValue" >
                    <value type="float" >0.0177</value>
                    <uncertainty type="Uncertainty" >
                     <precision type="int" >4</precision>
                     <uncertainty type="int" >6</uncertainty>
                    </uncertainty>
                   </item>
                   <item type="UncertainValue" >
                    <value type="float" >0.032300000000000002</value>
                    <uncertainty type="Uncertainty" >
                     <precision type="int" >4</precision>
                     <uncertainty type="int" >8</uncertainty>
                    </uncertainty>
                   </item>
                   <item type="UncertainValue" >
                    <value type="float" >-0.0085000000000000006</value>
                    <uncertainty type="Uncertainty" >
                     <precision type="int" >4</precision>
                     <uncertainty type="int" >6</uncertainty>
                    </uncertainty>
                   </item>
                   <item type="UncertainValue" >
                    <value type="float" >0.016500000000000001</value>
                    <uncertainty type="Uncertainty" >
                     <precision type="int" >4</precision>
                     <uncertainty type="int" >6</uncertainty>
                    </uncertainty>
                   </item>
                   <item type="UncertainValue" >
                    <value type="float" >-0.0051000000000000004</value>
                    <uncertainty type="Uncertainty" >
                     <precision type="int" >4</precision>
                     <uncertainty type="int" >6</uncertainty>
                    </uncertainty>
                   </item>
                  </uvalues>
                  <type type="AtomicDisplacementParameters::Type" >
                   <enumerator type="int" >0</enumerator>
                  </type>
                  <u_equivalent type="float" >0.028157472899670577</u_equivalent>
                 </value>
                </adps>
               </value>
              </site>
              <annotations type="Annotations" >
               <annotations type="Container" >
                <count type="int" >1</count>
                <item type="Handle" >
                 <serial_number type="int" >11</serial_number>
                 <value type="FileOrdering" >
                  <value type="Handle" >
                   <serial_number type="int" >12</serial_number>
                   <value type="FileOrdering" >
                    <file_order type="int" >0</file_order>
                   </value>
                  </value>
                 </value>
                </item>
               </annotations>
              </annotations>
             </value>
            </item>
            <item type="Handle" >
             <serial_number type="int" >13</serial_number>
             <value type="Atom3d" >
              <element type="Element" >
               <code type="char" >64</code>
              </element>
              <formal_charge type="int" >0</formal_charge>
              <radius type="float" >0.68000000000000005</radius>
              <label type="string" >O2</label>
              <site type="Handle" >
               <serial_number type="int" >14</serial_number>
               <value type="Site" >
                <orthogonal type="Point" >
                 <coordinates type="Vector" >
                  <vector type="Container" >
                   <count type="int" >3</count>
                   <item type="float" >3.9659659394722313</item>
                   <item type="float" >-0.71394157399999958</item>
                   <item type="float" >4.0006902739964998</item>
                  </vector>
                 </coordinates>
                </orthogonal>
                <fractional type="Point" >
                 <coordinates type="Vector" >
                  <vector type="Container" >
                   <count type="int" >3</count>
                   <item type="float" >0.37444</item>
                   <item type="float" >-0.070660000000000001</item>
                   <item type="float" >0.22345000000000001</item>
                  </vector>
                 </coordinates>
                </fractional>
                <uncertain_value type="UncertainValue" >
                 <value type="float" >1</value>
                 <uncertainty type="Uncertainty" >
                  <precision type="int" >0</precision>
                  <uncertainty type="int" >0</uncertainty>
                 </uncertainty>
                </uncertain_value>
                <uncertainty type="Handle" >
                 <serial_number type="int" >15</serial_number>
                 <value type="Container" >
                  <count type="int" >3</count>
                  <item type="Uncertainty" >
                   <precision type="int" >5</precision>
                   <uncertainty type="int" >10</uncertainty>
                  </item>
                  <item type="Uncertainty" >
                   <precision type="int" >5</precision>
                   <uncertainty type="int" >13</uncertainty>
                  </item>
                  <item type="Uncertainty" >
                   <precision type="int" >5</precision>
                   <uncertainty type="int" >7</uncertainty>
                  </item>
                 </value>
                </uncertainty>
                <adps type="Handle" >
                 <serial_number type="int" >16</serial_number>
                 <value type="AtomicDisplacementParameters" >
                  <uvalues type="Container" >
                   <count type="int" >6</count>
                   <item type="UncertainValue" >
                    <value type="float" >0.031399999999999997</value>
                    <uncertainty type="Uncertainty" >
                     <precision type="int" >4</precision>
                     <uncertainty type="int" >7</uncertainty>
                    </uncertainty>
                   </item>
                   <item type="UncertainValue" >
                    <value type="float" >0.018200000000000001</value>
                    <uncertainty type="Uncertainty" >
                     <precision type="int" >4</precision>
                     <uncertainty type="int" >6</uncertainty>
                    </uncertainty>
                   </item>
                   <item type="UncertainValue" >
                    <value type="float" >0.0235</value>
                    <uncertainty type="Uncertainty" >
                     <precision type="int" >4</precision>
                     <uncertainty type="int" >7</uncertainty>
                    </uncertainty>
                   </item>
                   <item type="UncertainValue" >
                    <value type="float" >-0.0041000000000000003</value>
                    <uncertainty type="Uncertainty" >
                     <precision type="int" >4</precision>
                     <uncertainty type="int" >5</uncertainty>
                    </uncertainty>
                   </item>
                   <item type="UncertainValue" >
                    <value type="float" >0.0073000000000000001</value>
                    <uncertainty type="Uncertainty" >
                     <precision type="int" >4</precision>
                     <uncertainty type="int" >6</uncertainty>
                    </uncertainty>
                   </item>
                   <item type="UncertainValue" >
                    <value type="float" >-0.0061000000000000004</value>
                    <uncertainty type="Uncertainty" >
                     <precision type="int" >4</precision>
                     <uncertainty type="int" >5</uncertainty>
                    </uncertainty>
                   </item>
                  </uvalues>
                  <type type="AtomicDisplacementParameters::Type" >
                   <enumerator type="int" >0</enumerator>
                  </type>
                  <u_equivalent type="float" >0.024534934414013904</u_equivalent>
                 </value>
                </adps>
               </value>
              </site>
              <annotations type="Annotations" >
               <annotations type="Container" >
                <count type="int" >1</count>
                <item type="Handle" >
                 <serial_number type="int" >17</serial_number>
                 <value type="FileOrdering" >
                  <value type="Handle" >
                   <serial_number type="int" >18</serial_number>
                   <value type="FileOrdering" >
                    <file_order type="int" >1</file_order>
                   </value>
                  </value>
                 </value>
                </item>
               </annotations>
              </annotations>
             </value>
            </item>
            <item type="Handle" >
             <serial_number type="int" >19</serial_number>
             <value type="Atom3d" >
              <element type="Element" >
               <code type="char" >56</code>
              </element>
              <formal_charge type="int" >0</formal_charge>
              <radius type="float" >0.68000000000000005</radius>
              <label type="string" >N1</label>
              <site type="Handle" >
               <serial_number type="int" >20</serial_number>
               <value type="Site" >
                <orthogonal type="Point" >
                 <coordinates type="Vector" >
                  <vector type="Container" >
                   <count type="int" >3</count>
                   <item type="float" >4.4674474352573448</item>
                   <item type="float" >2.4161456070000003</item>
                   <item type="float" >5.3331197669068588</item>
                  </vector>
                 </coordinates>
                </orthogonal>
                <fractional type="Point" >
                 <coordinates type="Vector" >
                  <vector type="Container" >
                   <count type="int" >3</count>
                   <item type="float" >0.44013000000000002</item>
                   <item type="float" >0.23913000000000001</item>
                   <item type="float" >0.29787000000000002</item>
                  </vector>
                 </coordinates>
                </fractional>
                <uncertain_value type="UncertainValue" >
                 <value type="float" >1</value>
                 <uncertainty type="Uncertainty" >
                  <precision type="int" >0</precision>
                  <uncertainty type="int" >0</uncertainty>
                 </uncertainty>
                </uncertain_value>
                <uncertainty type="Handle" >
                 <serial_number type="int" >21</serial_number>
                 <value type="Container" >
                  <count type="int" >3</count>
                  <item type="Uncertainty" >
                   <precision type="int" >5</precision>
                   <uncertainty type="int" >11</uncertainty>
                  </item>
                  <item type="Uncertainty" >
                   <precision type="int" >5</precision>
                   <uncertainty type="int" >15</uncertainty>
                  </item>
                  <item type="Uncertainty" >
                   <precision type="int" >5</precision>
                   <uncertainty type="int" >8</uncertainty>
                  </item>
                 </value>
                </uncertainty>
                <adps type="Handle" >
                 <serial_number type="int" >22</serial_number>
                 <value type="AtomicDisplacementParameters" >
                  <uvalues type="Container" >
                   <count type="int" >6</count>
                   <item type="UncertainValue" >
                    <value type="float" >0.025600000000000001</value>
                    <uncertainty type="Uncertainty" >
                     <precision type="int" >4</precision>
                     <uncertainty type="int" >8</uncertainty>
                    </uncertainty>
                   </item>
                   <item type="UncertainValue" >
                    <value type="float" >0.017000000000000001</value>
                    <uncertainty type="Uncertainty" >
                     <precision type="int" >4</precision>
                     <uncertainty type="int" >7</uncertainty>
                    </uncertainty>
                   </item>
                   <item type="UncertainValue" >
                    <value type="float" >0.0177</value>
                    <uncertainty type="Uncertainty" >
                     <precision type="int" >4</precision>
                     <uncertainty type="int" >7</uncertainty>
                    </uncertainty>
                   </item>
                   <item type="UncertainValue" >
                    <value type="float" >-0.0019</value>
                    <uncertainty type="Uncertainty" >
                     <precision type="int" >4</precision>
                     <uncertainty type="int" >6</uncertainty>
                    </uncertainty>
                   </item>
                   <item type="UncertainValue" >
                    <value type="float" >0.0080999999999999996</value>
                    <uncertainty type="Uncertainty" >
                     <precision type="int" >4</precision>
                     <uncertainty type="int" >6</uncertainty>
                    </uncertainty>
                   </item>
                   <item type="UncertainValue" >
                    <value type="float" >-0.00089999999999999998</value>
                    <uncertainty type="Uncertainty" >
                     <precision type="int" >4</precision>
                     <uncertainty type="int" >6</uncertainty>
                    </uncertainty>
                   </item>
                  </uvalues>
                  <type type="AtomicDisplacementParameters::Type" >
                   <enumerator type="int" >0</enumerator>
                  </type>
                  <u_equivalent type="float" >0.019729226363173383</u_equivalent>
                 </value>
                </adps>
               </value>
              </site>
              <annotations type="Annotations" >
               <annotations type="Container" >
                <count type="int" >1</count>
                <item type="Handle" >
                 <serial_number type="int" >23</serial_number>
                 <value type="FileOrdering" >
                  <value type="Handle" >
                   <serial_number type="int" >24</serial_number>
                   <value type="FileOrdering" >
                    <file_order type="int" >2</file_order>
                   </value>
                  </value>
                 </value>
                </item>
               </annotations>
              </annotations>
             </value>
            </item>
            <item type="Handle" >
             <serial_number type="int" >25</serial_number>
             <value type="Atom3d" >
              <element type="Element" >
               <code type="char" >56</code>
              </element>
              <formal_charge type="int" >0</formal_charge>
              <radius type="float" >0.68000000000000005</radius>
              <label type="string" >N2</label>
              <site type="Handle" >
               <serial_number type="int" >26</serial_number>
               <value type="Site" >
                <orthogonal type="Point" >
                 <coordinates type="Vector" >
                  <vector type="Container" >
                   <count type="int" >3</count>
                   <item type="float" >3.9515926498541498</item>
                   <item type="float" >0.39536560700000034</item>
                   <item type="float" >4.6520445463974518</item>
                  </vector>
                 </coordinates>
                </orthogonal>
                <fractional type="Point" >
                 <coordinates type="Vector" >
                  <vector type="Container" >
                   <count type="int" >3</count>
                   <item type="float" >0.38785999999999998</item>
                   <item type="float" >0.039129999999999998</item>
                   <item type="float" >0.25983000000000001</item>
                  </vector>
                 </coordinates>
                </fractional>
                <uncertain_value type="UncertainValue" >
                 <value type="float" >1</value>
                 <uncertainty type="Uncertainty" >
                  <precision type="int" >0</precision>
                  <uncertainty type="int" >0</uncertainty>
                 </uncertainty>
                </uncertain_value>
                <uncertainty type="Handle" >
                 <serial_number type="int" >27</serial_number>
                 <value type="Container" >
                  <count type="int" >3</count>
                  <item type="Uncertainty" >
                   <precision type="int" >5</precision>
                   <uncertainty type="int" >11</uncertainty>
                  </item>
                  <item type="Uncertainty" >
                   <precision type="int" >5</precision>
                   <uncertainty type="int" >15</uncertainty>
                  </item>
                  <item type="Uncertainty" >
                   <precision type="int" >5</precision>
                   <uncertainty type="int" >8</uncertainty>
                  </item>
                 </value>
                </uncertainty>
                <adps type="Handle" >
                 <serial_number type="int" >28</serial_number>
                 <value type="AtomicDisplacementParameters" >
                  <uvalues type="Container" >
                   <count type="int" >6</count>
                   <item type="UncertainValue" >
                    <value type="float" >0.0224</value>
                    <uncertainty type="Uncertainty" >
                     <precision type="int" >4</precision>
                     <uncertainty type="int" >7</uncertainty>
                    </uncertainty>
                   </item>
                   <item type="UncertainValue" >
                    <value type="float" >0.0177</value>
                    <uncertainty type="Uncertainty" >
                     <precision type="int" >4</precision>
                     <uncertainty type="int" >7</uncertainty>
                    </uncertainty>
                   </item>
                   <item type="UncertainValue" >
                    <value type="float" >0.015800000000000002</value>
                    <uncertainty type="Uncertainty" >
                     <precision type="int" >4</precision>
                     <uncertainty type="int" >7</uncertainty>
                    </uncertainty>
                   </item>
                   <item type="UncertainValue" >
                    <value type="float" >-0.00029999999999999997</value>
                    <uncertainty type="Uncertainty" >
                     <precision type="int" >4</precision>
                     <uncertainty type="int" >6</uncertainty>
                    </uncertainty>
                   </item>
                   <item type="UncertainValue" >
                    <value type="float" >0.0040000000000000001</value>
                    <uncertainty type="Uncertainty" >
                     <precision type="int" >4</precision>
                     <uncertainty type="int" >6</uncertainty>
                    </uncertainty>
                   </item>
                   <item type="UncertainValue" >
                    <value type="float" >-0.0014</value>
                    <uncertainty type="Uncertainty" >
                     <precision type="int" >4</precision>
                     <uncertainty type="int" >6</uncertainty>
                    </uncertainty>
                   </item>
                  </uvalues>
                  <type type="AtomicDisplacementParameters::Type" >
                   <enumerator type="int" >0</enumerator>
                  </type>
                  <u_equivalent type="float" >0.018982427254499636</u_equivalent>
                 </value>
                </adps>
               </value>
              </site>
              <annotations type="Annotations" >
               <annotations type="Container" >
                <count type="int" >1</count>
                <item type="Handle" >
                 <serial_number type="int" >29</serial_number>
                 <value type="FileOrdering" >
                  <value type="Handle" >
                   <serial_number type="int" >30</serial_number>
                   <value type="FileOrdering" >
                    <file_order type="int" >3</file_order>
                   </value>
                  </value>
                 </value>
                </item>
               </annotations>
              </annotations>
             </value>
            </item>
            <item type="Handle" >
             <serial_number type="int" >31</serial_number>
             <value type="Atom3d" >
              <element type="Element" >
               <code type="char" >1</code>
              </element>
              <formal_charge type="int" >0</formal_charge>
              <radius type="float" >0.68000000000000005</radius>
              <label type="string" >C1</label>
              <site type="Handle" >
               <serial_number type="int" >32</serial_number>
               <value type="Site" >
                <orthogonal type="Point" >
                 <coordinates type="Vector" >
                  <vector type="Container" >
                   <count type="int" >3</count>
                   <item type="float" >4.7029569426134561</item>
                   <item type="float" >1.4850712220000004</item>
                   <item type="float" >4.3831236785727592</item>
                  </vector>
                 </coordinates>
                </orthogonal>
                <fractional type="Point" >
                 <coordinates type="Vector" >
                  <vector type="Container" >
                   <count type="int" >3</count>
                   <item type="float" >0.43601000000000001</item>
                   <item type="float" >0.14698</item>
                   <item type="float" >0.24481</item>
                  </vector>
                 </coordinates>
                </fractional>
                <uncertain_value type="UncertainValue" >
                 <value type="float" >1</value>
                 <uncertainty type="Uncertainty" >
                  <precision type="int" >0</precision>
                  <uncertainty type="int" >0</uncertainty>
                 </uncertainty>
                </uncertain_value>
                <uncertainty type="Handle" >
                 <serial_number type="int" >33</serial_number>
                 <value type="Container" >
                  <count type="int" >3</count>
                  <item type="Uncertainty" >
                   <precision type="int" >5</precision>
                   <uncertainty type="int" >13</uncertainty>
                  </item>
                  <item type="Uncertainty" >
                   <precision type="int" >5</precision>
                   <uncertainty type="int" >17</uncertainty>
                  </item>
                  <item type="Uncertainty" >
                   <precision type="int" >5</precision>
                   <uncertainty type="int" >10</uncertainty>
                  </item>
                 </value>
                </uncertainty>
                <adps type="Handle" >
                 <serial_number type="int" >34</serial_number>
                 <value type="AtomicDisplacementParameters" >
                  <uvalues type="Container" >
                   <count type="int" >6</count>
                   <item type="UncertainValue" >
                    <value type="float" >0.019900000000000001</value>
                    <uncertainty type="Uncertainty" >
                     <precision type="int" >4</precision>
                     <uncertainty type="int" >8</uncertainty>
                    </uncertainty>
                   </item>
                   <item type="UncertainValue" >
                    <value type="float" >0.018499999999999999</value>
                    <uncertainty type="Uncertainty" >
                     <precision type="int" >4</precision>
                     <uncertainty type="int" >8</uncertainty>
                    </uncertainty>
                   </item>
                   <item type="UncertainValue" >
                    <value type="float" >0.0143</value>
                    <uncertainty type="Uncertainty" >
                     <precision type="int" >4</precision>
                     <uncertainty type="int" >8</uncertainty>
                    </uncertainty>
                   </item>
                   <item type="UncertainValue" >
                    <value type="float" >-0.0001</value>
                    <uncertainty type="Uncertainty" >
                     <precision type="int" >4</precision>
                     <uncertainty type="int" >7</uncertainty>
                    </uncertainty>
                   </item>
                   <item type="UncertainValue" >
                    <value type="float" >0.0027000000000000001</value>
                    <uncertainty type="Uncertainty" >
                     <precision type="int" >4</precision>
                     <uncertainty type="int" >6</uncertainty>
                    </uncertainty>
                   </item>
                   <item type="UncertainValue" >
                    <value type="float" >0.00059999999999999995</value>
                    <uncertainty type="Uncertainty" >
                     <precision type="int" >4</precision>
                     <uncertainty type="int" >6</uncertainty>
                    </uncertainty>
                   </item>
                  </uvalues>
                  <type type="AtomicDisplacementParameters::Type" >
                   <enumerator type="int" >0</enumerator>
                  </type>
                  <u_equivalent type="float" >0.018068602273284787</u_equivalent>
                 </value>
                </adps>
               </value>
              </site>
              <annotations type="Annotations" >
               <annotations type="Container" >
                <count type="int" >1</count>
                <item type="Handle" >
                 <serial_number type="int" >35</serial_number>
                 <value type="FileOrdering" >
                  <value type="Handle" >
                   <serial_number type="int" >36</serial_number>
                   <value type="FileOrdering" >
                    <file_order type="int" >4</file_order>
                   </value>
                  </value>
                 </value>
                </item>
               </annotations>
              </annotations>
             </value>
            </item>
            <item type="Handle" >
             <serial_number type="int" >37</serial_number>
             <value type="Atom3d" >
              <element type="Element" >
               <code type="char" >1</code>
              </element>
              <formal_charge type="int" >0</formal_charge>
              <radius type="float" >0.68000000000000005</radius>
              <label type="string" >C2</label>
              <site type="Handle" >
               <serial_number type="int" >38</serial_number>
               <value type="Site" >
                <orthogonal type="Point" >
                 <coordinates type="Vector" >
                  <vector type="Container" >
                   <count type="int" >3</count>
                   <item type="float" >3.6343115617151165</item>
                   <item type="float" >1.8661903300000005</item>
                   <item type="float" >6.4523104092318571</item>
                  </vector>
                 </coordinates>
                </orthogonal>
                <fractional type="Point" >
                 <coordinates type="Vector" >
                  <vector type="Container" >
                   <count type="int" >3</count>
                   <item type="float" >0.40495999999999999</item>
                   <item type="float" >0.1847</item>
                   <item type="float" >0.36037999999999998</item>
                  </vector>
                 </coordinates>
                </fractional>
                <uncertain_value type="UncertainValue" >
                 <value type="float" >1</value>
                 <uncertainty type="Uncertainty" >
                  <precision type="int" >0</precision>
                  <uncertainty type="int" >0</uncertainty>
                 </uncertainty>
                </uncertain_value>
                <uncertainty type="Handle" >
                 <serial_number type="int" >39</serial_number>
                 <value type="Container" >
                  <count type="int" >3</count>
                  <item type="Uncertainty" >
                   <precision type="int" >5</precision>
                   <uncertainty type="int" >14</uncertainty>
                  </item>
                  <item type="Uncertainty" >
                   <precision type="int" >5</precision>
                   <uncertainty type="int" >17</uncertainty>
                  </item>
                  <item type="Uncertainty" >
                   <precision type="int" >5</precision>
                   <uncertainty type="int" >10</uncertainty>
                  </item>
                 </value>
                </uncertainty>
                <adps type="Handle" >
                 <serial_number type="int" >40</serial_number>
                 <value type="AtomicDisplacementParameters" >
                  <uvalues type="Container" >
                   <count type="int" >6</count>
                   <item type="UncertainValue" >
                    <value type="float" >0.024</value>
                    <uncertainty type="Uncertainty" >
                     <precision type="int" >4</precision>
                     <uncertainty type="int" >8</uncertainty>
                    </uncertainty>
                   </item>
                   <item type="UncertainValue" >
                    <value type="float" >0.0184</value>
                    <uncertainty type="Uncertainty" >
                     <precision type="int" >4</precision>
                     <uncertainty type="int" >8</uncertainty>
                    </uncertainty>
                   </item>
                   <item type="UncertainValue" >
                    <value type="float" >0.014</value>
                    <uncertainty type="Uncertainty" >
                     <precision type="int" >4</precision>
                     <uncertainty type="int" >8</uncertainty>
                    </uncertainty>
                   </item>
                   <item type="UncertainValue" >
                    <value type="float" >-0.00040000000000000002</value>
                    <uncertainty type="Uncertainty" >
                     <precision type="int" >4</precision>
                     <uncertainty type="int" >7</uncertainty>
                    </uncertainty>
                   </item>
                   <item type="UncertainValue" >
                    <value type="float" >0.0063</value>
                    <uncertainty type="Uncertainty" >
                     <precision type="int" >4</precision>
                     <uncertainty type="int" >7</uncertainty>
                    </uncertainty>
                   </item>
                   <item type="UncertainValue" >
                    <value type="float" >0.00050000000000000001</value>
                    <uncertainty type="Uncertainty" >
                     <precision type="int" >4</precision>
                     <uncertainty type="int" >6</uncertainty>
                    </uncertainty>
                   </item>
                  </uvalues>
                  <type type="AtomicDisplacementParameters::Type" >
                   <enumerator type="int" >0</enumerator>
                  </type>
                  <u_equivalent type="float" >0.018648399556151697</u_equivalent>
                 </value>
                </adps>
               </value>
              </site>
              <annotations type="Annotations" >
               <annotations type="Container" >
                <count type="int" >1</count>
                <item type="Handle" >
                 <serial_number type="int" >41</serial_number>
                 <value type="FileOrdering" >
                  <value type="Handle" >
                   <serial_number type="int" >42</serial_number>
                   <value type="FileOrdering" >
                    <file_order type="int" >5</file_order>
                   </value>
                  </value>
                 </value>
                </item>
               </annotations>
              </annotations>
             </value>
            </item>
            <item type="Handle" >
             <serial_number type="int" >43</serial_number>
             <value type="Atom3d" >
              <element type="Element" >
               <code type="char" >1</code>
              </element>
              <formal_charge type="int" >0</formal_charge>
              <radius type="float" >0.68000000000000005</radius>
              <label type="string" >C3</label>
              <site type="Handle" >
               <serial_number type="int" >44</serial_number>
               <value type="Site" >
                <orthogonal type="Point" >
                 <coordinates type="Vector" >
                  <vector type="Container" >
                   <count type="int" >3</count>
                   <item type="float" >2.9411060849399684</item>
                   <item type="float" >0.6781737680000004</item>
                   <item type="float" >5.73130885481772</item>
                  </vector>
                 </coordinates>
                </orthogonal>
                <fractional type="Point" >
                 <coordinates type="Vector" >
                  <vector type="Container" >
                   <count type="int" >3</count>
                   <item type="float" >0.33903</item>
                   <item type="float" >0.067119999999999999</item>
                   <item type="float" >0.32011000000000001</item>
                  </vector>
                 </coordinates>
                </fractional>
                <uncertain_value type="UncertainValue" >
                 <value type="float" >1</value>
                 <uncertainty type="Uncertainty" >
                  <precision type="int" >0</precision>
                  <uncertainty type="int" >0</uncertainty>
                 </uncertainty>
                </uncertain_value>
                <uncertainty type="Handle" >
                 <serial_number type="int" >45</serial_number>
                 <value type="Container" >
                  <count type="int" >3</count>
                  <item type="Uncertainty" >
                   <precision type="int" >5</precision>
                   <uncertainty type="int" >14</uncertainty>
                  </item>
                  <item type="Uncertainty" >
                   <precision type="int" >5</precision>
                   <uncertainty type="int" >18</uncertainty>
                  </item>
                  <item type="Uncertainty" >
                   <precision type="int" >5</precision>
                   <uncertainty type="int" >10</uncertainty>
                  </item>
                 </value>
                </uncertainty>
                <adps type="Handle" >
                 <serial_number type="int" >46</serial_number>
                 <value type="AtomicDisplacementParameters" >
                  <uvalues type="Container" >
                   <count type="int" >6</count>
                   <item type="UncertainValue" >
                    <value type="float" >0.023199999999999998</value>
                    <uncertainty type="Uncertainty" >
                     <precision type="int" >4</precision>
                     <uncertainty type="int" >9</uncertainty>
                    </uncertainty>
                   </item>
                   <item type="UncertainValue" >
                    <value type="float" >0.017399999999999999</value>
                    <uncertainty type="Uncertainty" >
                     <precision type="int" >4</precision>
                     <uncertainty type="int" >8</uncertainty>
                    </uncertainty>
                   </item>
                   <item type="UncertainValue" >
                    <value type="float" >0.019699999999999999</value>
                    <uncertainty type="Uncertainty" >
                     <precision type="int" >4</precision>
                     <uncertainty type="int" >9</uncertainty>
                    </uncertainty>
                   </item>
                   <item type="UncertainValue" >
                    <value type="float" >-0.0011000000000000001</value>
                    <uncertainty type="Uncertainty" >
                     <precision type="int" >4</precision>
                     <uncertainty type="int" >7</uncertainty>
                    </uncertainty>
                   </item>
                   <item type="UncertainValue" >
                    <value type="float" >0.0080999999999999996</value>
                    <uncertainty type="Uncertainty" >
                     <precision type="int" >4</precision>
                     <uncertainty type="int" >7</uncertainty>
                    </uncertainty>
                   </item>
                   <item type="UncertainValue" >
                    <value type="float" >0.0001</value>
                    <uncertainty type="Uncertainty" >
                     <precision type="int" >4</precision>
                     <uncertainty type="int" >7</uncertainty>
                    </uncertainty>
                   </item>
                  </uvalues>
                  <type type="AtomicDisplacementParameters::Type" >
                   <enumerator type="int" >0</enumerator>
                  </type>
                  <u_equivalent type="float" >0.019716568147613984</u_equivalent>
                 </value>
                </adps>
               </value>
              </site>
              <annotations type="Annotations" >
               <annotations type="Container" >
                <count type="int" >1</count>
                <item type="Handle" >
                 <serial_number type="int" >47</serial_number>
                 <value type="FileOrdering" >
                  <value type="Handle" >
                   <serial_number type="int" >48</serial_number>
                   <value type="FileOrdering" >
                    <file_order type="int" >6</file_order>
                   </value>
                  </value>
                 </value>
                </item>
               </annotations>
              </annotations>
             </value>
            </item>
            <item type="Handle" >
             <serial_number type="int" >49</serial_number>
             <value type="Atom3d" >
              <element type="Element" >
               <code type="char" >1</code>
              </element>
              <formal_charge type="int" >0</formal_charge>
              <radius type="float" >0.68000000000000005</radius>
              <label type="string" >C4</label>
              <site type="Handle" >
               <serial_number type="int" >50</serial_number>
               <value type="Site" >
                <orthogonal type="Point" >
                 <coordinates type="Vector" >
                  <vector type="Container" >
                   <count type="int" >3</count>
                   <item type="float" >4.6230103708255434</item>
                   <item type="float" >1.4276810700000007</item>
                   <item type="float" >7.532290885076427</item>
                  </vector>
                 </coordinates>
                </orthogonal>
                <fractional type="Point" >
                 <coordinates type="Vector" >
                  <vector type="Container" >
                   <count type="int" >3</count>
                   <item type="float" >0.50014000000000003</item>
                   <item type="float" >0.14130000000000001</item>
                   <item type="float" >0.42070000000000002</item>
                  </vector>
                 </coordinates>
                </fractional>
                <uncertain_value type="UncertainValue" >
                 <value type="float" >1</value>
                 <uncertainty type="Uncertainty" >
                  <precision type="int" >0</precision>
                  <uncertainty type="int" >0</uncertainty>
                 </uncertainty>
                </uncertain_value>
                <uncertainty type="Handle" >
                 <serial_number type="int" >51</serial_number>
                 <value type="Container" >
                  <count type="int" >3</count>
                  <item type="Uncertainty" >
                   <precision type="int" >5</precision>
                   <uncertainty type="int" >16</uncertainty>
                  </item>
                  <item type="Uncertainty" >
                   <precision type="int" >4</precision>
                   <uncertainty type="int" >2</uncertainty>
                  </item>
                  <item type="Uncertainty" >
                   <precision type="int" >5</precision>
                   <uncertainty type="int" >11</uncertainty>
                  </item>
                 </value>
                </uncertainty>
                <adps type="Handle" >
                 <serial_number type="int" >52</serial_number>
                 <value type="AtomicDisplacementParameters" >
                  <uvalues type="Container" >
                   <count type="int" >6</count>
                   <item type="UncertainValue" >
                    <value type="float" >0.030700000000000002</value>
                    <uncertainty type="Uncertainty" >
                     <precision type="int" >4</precision>
                     <uncertainty type="int" >10</uncertainty>
                    </uncertainty>
                   </item>
                   <item type="UncertainValue" >
                    <value type="float" >0.027400000000000001</value>
                    <uncertainty type="Uncertainty" >
                     <precision type="int" >4</precision>
                     <uncertainty type="int" >10</uncertainty>
                    </uncertainty>
                   </item>
                   <item type="UncertainValue" >
                    <value type="float" >0.020199999999999999</value>
                    <uncertainty type="Uncertainty" >
                     <precision type="int" >4</precision>
                     <uncertainty type="int" >9</uncertainty>
                    </uncertainty>
                   </item>
                   <item type="UncertainValue" >
                    <value type="float" >0.00050000000000000001</value>
                    <uncertainty type="Uncertainty" >
                     <precision type="int" >4</precision>
                     <uncertainty type="int" >8</uncertainty>
                    </uncertainty>
                   </item>
                   <item type="UncertainValue" >
                    <value type="float" >0.00059999999999999995</value>
                    <uncertainty type="Uncertainty" >
                     <precision type="int" >4</precision>
                     <uncertainty type="int" >8</uncertainty>
                    </uncertainty>
                   </item>
                   <item type="UncertainValue" >
                    <value type="float" >-0.0016000000000000001</value>
                    <uncertainty type="Uncertainty" >
                     <precision type="int" >4</precision>
                     <uncertainty type="int" >8</uncertainty>
                    </uncertainty>
                   </item>
                  </uvalues>
                  <type type="AtomicDisplacementParameters::Type" >
                   <enumerator type="int" >0</enumerator>
                  </type>
                  <u_equivalent type="float" >0.027581793080220133</u_equivalent>
                 </value>
                </adps>
               </value>
              </site>
              <annotations type="Annotations" >
               <annotations type="Container" >
                <count type="int" >1</count>
                <item type="Handle" >
                 <serial_number type="int" >53</serial_number>
                 <value type="FileOrdering" >
                  <value type="Handle" >
                   <serial_number type="int" >54</serial_number>
                   <value type="FileOrdering" >
                    <file_order type="int" >7</file_order>
                   </value>
                  </value>
                 </value>
                </item>
               </annotations>
              </annotations>
             </value>
            </item>
            <item type="Handle" >
             <serial_number type="int" >55</serial_number>
             <value type="Atom3d" >
              <element type="Element" >
               <code type="char" >2</code>
              </element>
              <formal_charge type="int" >0</formal_charge>
              <radius type="float" >0.23000000000000001</radius>
              <label type="string" >H4A</label>
              <site type="Handle" >
               <serial_number type="int" >56</serial_number>
               <value type="Site" >
                <orthogonal type="Point" >
                 <coordinates type="Vector" >
                  <vector type="Container" >
                   <count type="int" >3</count>
                   <item type="float" >5.2023445066440708</item>
                   <item type="float" >0.72242885000000046</item>
                   <item type="float" >7.1777880100478706</item>
                  </vector>
                 </coordinates>
                </orthogonal>
                <fractional type="Point" >
                 <coordinates type="Vector" >
                  <vector type="Container" >
                   <count type="int" >3</count>
                   <item type="float" >0.53400000000000003</item>
                   <item type="float" >0.071499999999999994</item>
                   <item type="float" >0.40089999999999998</item>
                  </vector>
                 </coordinates>
                </fractional>
                <uncertain_value type="UncertainValue" >
                 <value type="float" >1</value>
                 <uncertainty type="Uncertainty" >
                  <precision type="int" >0</precision>
                  <uncertainty type="int" >0</uncertainty>
                 </uncertainty>
                </uncertain_value>
                <uncertainty type="Handle" >
                 <serial_number type="int" >57</serial_number>
                 <value type="Container" >
                  <count type="int" >3</count>
                  <item type="Uncertainty" >
                   <precision type="int" >4</precision>
                   <uncertainty type="int" >0</uncertainty>
                  </item>
                  <item type="Uncertainty" >
                   <precision type="int" >4</precision>
                   <uncertainty type="int" >0</uncertainty>
                  </item>
                  <item type="Uncertainty" >
                   <precision type="int" >4</precision>
                   <uncertainty type="int" >0</uncertainty>
                  </item>
                 </value>
                </uncertainty>
                <adps type="Handle" >
                 <serial_number type="int" >58</serial_number>
                 <value type="AtomicDisplacementParameters" >
                  <uvalues type="Container" >
                   <count type="int" >6</count>
                   <item type="UncertainValue" >
                    <value type="float" >0.041000000000000009</value>
                    <uncertainty type="Uncertainty" >
                     <precision type="int" >1000000</precision>
                     <uncertainty type="int" >0</uncertainty>
                    </uncertainty>
                   </item>
                   <item type="UncertainValue" >
                    <value type="float" >0.041000000000000002</value>
                    <uncertainty type="Uncertainty" >
                     <precision type="int" >1000000</precision>
                     <uncertainty type="int" >0</uncertainty>
                    </uncertainty>
                   </item>
                   <item type="UncertainValue" >
                    <value type="float" >0.041000000000000002</value>
                    <uncertainty type="Uncertainty" >
                     <precision type="int" >1000000</precision>
                     <uncertainty type="int" >0</uncertainty>
                    </uncertainty>
                   </item>
                   <item type="UncertainValue" >
                    <value type="float" >-3.4005326200858998e-18</value>
                    <uncertainty type="Uncertainty" >
                     <precision type="int" >1000000</precision>
                     <uncertainty type="int" >0</uncertainty>
                    </uncertainty>
                   </item>
                   <item type="UncertainValue" >
                    <value type="float" >0.012072750964821478</value>
                    <uncertainty type="Uncertainty" >
                     <precision type="int" >1000000</precision>
                     <uncertainty type="int" >0</uncertainty>
                    </uncertainty>
                   </item>
                   <item type="UncertainValue" >
                    <value type="float" >-3.400532620085899e-18</value>
                    <uncertainty type="Uncertainty" >
                     <precision type="int" >1000000</precision>
                     <uncertainty type="int" >0</uncertainty>
                    </uncertainty>
                   </item>
                  </uvalues>
                  <type type="AtomicDisplacementParameters::Type" >
                   <enumerator type="int" >1</enumerator>
                  </type>
                  <u_equivalent type="float" >0.041000000000000002</u_equivalent>
                 </value>
                </adps>
               </value>
              </site>
              <annotations type="Annotations" >
               <annotations type="Container" >
                <count type="int" >1</count>
                <item type="Handle" >
                 <serial_number type="int" >59</serial_number>
                 <value type="FileOrdering" >
                  <value type="Handle" >
                   <serial_number type="int" >60</serial_number>
                   <value type="FileOrdering" >
                    <file_order type="int" >8</file_order>
                   </value>
                  </value>
                 </value>
                </item>
               </annotations>
              </annotations>
             </value>
            </item>
            <item type="Handle" >
             <serial_number type="int" >61</serial_number>
             <value type="Atom3d" >
              <element type="Element" >
               <code type="char" >2</code>
              </element>
              <formal_charge type="int" >0</formal_charge>
              <radius type="float" >0.23000000000000001</radius>
              <label type="string" >H4B</label>
              <site type="Handle" >
               <serial_number type="int" >62</serial_number>
               <value type="Site" >
                <orthogonal type="Point" >
                 <coordinates type="Vector" >
                  <vector type="Container" >
                   <count type="int" >3</count>
                   <item type="float" >4.1295127254648261</item>
                   <item type="float" >1.0871796400000007</item>
                   <item type="float" >8.3075421218812977</item>
                  </vector>
                 </coordinates>
                </orthogonal>
                <fractional type="Point" >
                 <coordinates type="Vector" >
                  <vector type="Container" >
                   <count type="int" >3</count>
                   <item type="float" >0.48180000000000001</item>
                   <item type="float" >0.1076</item>
                   <item type="float" >0.46400000000000002</item>
                  </vector>
                 </coordinates>
                </fractional>
                <uncertain_value type="UncertainValue" >
                 <value type="float" >1</value>
                 <uncertainty type="Uncertainty" >
                  <precision type="int" >0</precision>
                  <uncertainty type="int" >0</uncertainty>
                 </uncertainty>
                </uncertain_value>
                <uncertainty type="Handle" >
                 <serial_number type="int" >63</serial_number>
                 <value type="Container" >
                  <count type="int" >3</count>
                  <item type="Uncertainty" >
                   <precision type="int" >4</precision>
                   <uncertainty type="int" >0</uncertainty>
                  </item>
                  <item type="Uncertainty" >
                   <precision type="int" >4</precision>
                   <uncertainty type="int" >0</uncertainty>
                  </item>
                  <item type="Uncertainty" >
                   <precision type="int" >4</precision>
                   <uncertainty type="int" >0</uncertainty>
                  </item>
                 </value>
                </uncertainty>
                <adps type="Handle" >
                 <serial_number type="int" >64</serial_number>
                 <value type="AtomicDisplacementParameters" >
                  <uvalues type="Container" >
                   <count type="int" >6</count>
                   <item type="UncertainValue" >
                    <value type="float" >0.041000000000000009</value>
                    <uncertainty type="Uncertainty" >
                     <precision type="int" >1000000</precision>
                     <uncertainty type="int" >0</uncertainty>
                    </uncertainty>
                   </item>
                   <item type="UncertainValue" >
                    <value type="float" >0.041000000000000002</value>
                    <uncertainty type="Uncertainty" >
                     <precision type="int" >1000000</precision>
                     <uncertainty type="int" >0</uncertainty>
                    </uncertainty>
                   </item>
                   <item type="UncertainValue" >
                    <value type="float" >0.041000000000000002</value>
                    <uncertainty type="Uncertainty" >
                     <precision type="int" >1000000</precision>
                     <uncertainty type="int" >0</uncertainty>
                    </uncertainty>
                   </item>
                   <item type="UncertainValue" >
                    <value type="float" >-3.4005326200858998e-18</value>
                    <uncertainty type="Uncertainty" >
                     <precision type="int" >1000000</precision>
                     <uncertainty type="int" >0</uncertainty>
                    </uncertainty>
                   </item>
                   <item type="UncertainValue" >
                    <value type="float" >0.012072750964821478</value>
                    <uncertainty type="Uncertainty" >
                     <precision type="int" >1000000</precision>
                     <uncertainty type="int" >0</uncertainty>
                    </uncertainty>
                   </item>
                   <item type="UncertainValue" >
                    <value type="float" >-3.400532620085899e-18</value>
                    <uncertainty type="Uncertainty" >
                     <precision type="int" >1000000</precision>
                     <uncertainty type="int" >0</uncertainty>
                    </uncertainty>
                   </item>
                  </uvalues>
                  <type type="AtomicDisplacementParameters::Type" >
                   <enumerator type="int" >1</enumerator>
                  </type>
                  <u_equivalent type="float" >0.041000000000000002</u_equivalent>
                 </value>
                </adps>
               </value>
              </site>
              <annotations type="Annotations" >
               <annotations type="Container" >
                <count type="int" >1</count>
                <item type="Handle" >
                 <serial_number type="int" >65</serial_number>
                 <value type="FileOrdering" >
                  <value type="Handle" >
                   <serial_number type="int" >66</serial_number>
                   <value type="FileOrdering" >
                    <file_order type="int" >9</file_order>
                   </value>
                  </value>
                 </value>
                </item>
               </annotations>
              </annotations>
             </value>
            </item>
            <item type="Handle" >
             <serial_number type="int" >67</serial_number>
             <value type="Atom3d" >
              <element type="Element" >
               <code type="char" >2</code>
              </element>
              <formal_charge type="int" >0</formal_charge>
              <radius type="float" >0.23000000000000001</radius>
              <label type="string" >H4C</label>
              <site type="Handle" >
               <serial_number type="int" >68</serial_number>
               <value type="Site" >
                <orthogonal type="Point" >
                 <coordinates type="Vector" >
                  <vector type="Container" >
                   <count type="int" >3</count>
                   <item type="float" >5.1703156081769777</item>
                   <item type="float" >2.1945670800000006</item>
                   <item type="float" >7.8044345063104688</item>
                  </vector>
                 </coordinates>
                </orthogonal>
                <fractional type="Point" >
                 <coordinates type="Vector" >
                  <vector type="Container" >
                   <count type="int" >3</count>
                   <item type="float" >0.54559999999999997</item>
                   <item type="float" >0.2172</item>
                   <item type="float" >0.43590000000000001</item>
                  </vector>
                 </coordinates>
                </fractional>
                <uncertain_value type="UncertainValue" >
                 <value type="float" >1</value>
                 <uncertainty type="Uncertainty" >
                  <precision type="int" >0</precision>
                  <uncertainty type="int" >0</uncertainty>
                 </uncertainty>
                </uncertain_value>
                <uncertainty type="Handle" >
                 <serial_number type="int" >69</serial_number>
                 <value type="Container" >
                  <count type="int" >3</count>
                  <item type="Uncertainty" >
                   <precision type="int" >4</precision>
                   <uncertainty type="int" >0</uncertainty>
                  </item>
                  <item type="Uncertainty" >
                   <precision type="int" >4</precision>
                   <uncertainty type="int" >0</uncertainty>
                  </item>
                  <item type="Uncertainty" >
                   <precision type="int" >4</precision>
                   <uncertainty type="int" >0</uncertainty>
                  </item>
                 </value>
                </uncertainty>
                <adps type="Handle" >
                 <serial_number type="int" >70</serial_number>
                 <value type="AtomicDisplacementParameters" >
                  <uvalues type="Container" >
                   <count type="int" >6</count>
                   <item type="UncertainValue" >
                    <value type="float" >0.041000000000000009</value>
                    <uncertainty type="Uncertainty" >
                     <precision type="int" >1000000</precision>
                     <uncertainty type="int" >0</uncertainty>
                    </uncertainty>
                   </item>
                   <item type="UncertainValue" >
                    <value type="float" >0.041000000000000002</value>
                    <uncertainty type="Uncertainty" >
                     <precision type="int" >1000000</precision>
                     <uncertainty type="int" >0</uncertainty>
                    </uncertainty>
                   </item>
                   <item type="UncertainValue" >
                    <value type="float" >0.041000000000000002</value>
                    <uncertainty type="Uncertainty" >
                     <precision type="int" >1000000</precision>
                     <uncertainty type="int" >0</uncertainty>
                    </uncertainty>
                   </item>
                   <item type="UncertainValue" >
                    <value type="float" >-3.4005326200858998e-18</value>
                    <uncertainty type="Uncertainty" >
                     <precision type="int" >1000000</precision>
                     <uncertainty type="int" >0</uncertainty>
                    </uncertainty>
                   </item>
                   <item type="UncertainValue" >
                    <value type="float" >0.012072750964821478</value>
                    <uncertainty type="Uncertainty" >
                     <precision type="int" >1000000</precision>
                     <uncertainty type="int" >0</uncertainty>
                    </uncertainty>
                   </item>
                   <item type="UncertainValue" >
                    <value type="float" >-3.400532620085899e-18</value>
                    <uncertainty type="Uncertainty" >
                     <precision type="int" >1000000</precision>
                     <uncertainty type="int" >0</uncertainty>
                    </uncertainty>
                   </item>
                  </uvalues>
                  <type type="AtomicDisplacementParameters::Type" >
                   <enumerator type="int" >1</enumerator>
                  </type>
                  <u_equivalent type="float" >0.041000000000000002</u_equivalent>
                 </value>
                </adps>
               </value>
              </site>
              <annotations type="Annotations" >
               <annotations type="Container" >
                <count type="int" >1</count>
                <item type="Handle" >
                 <serial_number type="int" >71</serial_number>
                 <value type="FileOrdering" >
                  <value type="Handle" >
                   <serial_number type="int" >72</serial_number>
                   <value type="FileOrdering" >
                    <file_order type="int" >10</file_order>
                   </value>
                  </value>
                 </value>
                </item>
               </annotations>
              </annotations>
             </value>
            </item>
            <item type="Handle" >
             <serial_number type="int" >73</serial_number>
             <value type="Atom3d" >
              <element type="Element" >
               <code type="char" >1</code>
              </element>
              <formal_charge type="int" >0</formal_charge>
              <radius type="float" >0.68000000000000005</radius>
              <label type="string" >C5</label>
              <site type="Handle" >
               <serial_number type="int" >74</serial_number>
               <value type="Site" >
                <orthogonal type="Point" >
                 <coordinates type="Vector" >
                  <vector type="Container" >
                   <count type="int" >3</count>
                   <item type="float" >2.6898753881472839</item>
                   <item type="float" >2.9278071030000006</item>
                   <item type="float" >6.9887198100326415</item>
                  </vector>
                 </coordinates>
                </orthogonal>
                <fractional type="Point" >
                 <coordinates type="Vector" >
                  <vector type="Container" >
                   <count type="int" >3</count>
                   <item type="float" >0.34883999999999998</item>
                   <item type="float" >0.28977000000000003</item>
                   <item type="float" >0.39034000000000002</item>
                  </vector>
                 </coordinates>
                </fractional>
                <uncertain_value type="UncertainValue" >
                 <value type="float" >1</value>
                 <uncertainty type="Uncertainty" >
                  <precision type="int" >0</precision>
                  <uncertainty type="int" >0</uncertainty>
                 </uncertainty>
                </uncertain_value>
                <uncertainty type="Handle" >
                 <serial_number type="int" >75</serial_number>
                 <value type="Container" >
                  <count type="int" >3</count>
                  <item type="Uncertainty" >
                   <precision type="int" >5</precision>
                   <uncertainty type="int" >16</uncertainty>
                  </item>
                  <item type="Uncertainty" >
                   <precision type="int" >5</precision>
                   <uncertainty type="int" >19</uncertainty>
                  </item>
                  <item type="Uncertainty" >
                   <precision type="int" >5</precision>
                   <uncertainty type="int" >11</uncertainty>
                  </item>
                 </value>
                </uncertainty>
                <adps type="Handle" >
                 <serial_number type="int" >76</serial_number>
                 <value type="AtomicDisplacementParameters" >
                  <uvalues type="Container" >
                   <count type="int" >6</count>
                   <item type="UncertainValue" >
                    <value type="float" >0.035499999999999997</value>
                    <uncertainty type="Uncertainty" >
                     <precision type="int" >4</precision>
                     <uncertainty type="int" >10</uncertainty>
                    </uncertainty>
                   </item>
                   <item type="UncertainValue" >
                    <value type="float" >0.021399999999999999</value>
                    <uncertainty type="Uncertainty" >
                     <precision type="int" >4</precision>
                     <uncertainty type="int" >9</uncertainty>
                    </uncertainty>
                   </item>
                   <item type="UncertainValue" >
                    <value type="float" >0.0224</value>
                    <uncertainty type="Uncertainty" >
                     <precision type="int" >4</precision>
                     <uncertainty type="int" >10</uncertainty>
                    </uncertainty>
                   </item>
                   <item type="UncertainValue" >
                    <value type="float" >0.00080000000000000004</value>
                    <uncertainty type="Uncertainty" >
                     <precision type="int" >4</precision>
                     <uncertainty type="int" >8</uncertainty>
                    </uncertainty>
                   </item>
                   <item type="UncertainValue" >
                    <value type="float" >0.012800000000000001</value>
                    <uncertainty type="Uncertainty" >
                     <precision type="int" >4</precision>
                     <uncertainty type="int" >8</uncertainty>
                    </uncertainty>
                   </item>
                   <item type="UncertainValue" >
                    <value type="float" >-0.0028999999999999998</value>
                    <uncertainty type="Uncertainty" >
                     <precision type="int" >4</precision>
                     <uncertainty type="int" >7</uncertainty>
                    </uncertainty>
                   </item>
                  </uvalues>
                  <type type="AtomicDisplacementParameters::Type" >
                   <enumerator type="int" >0</enumerator>
                  </type>
                  <u_equivalent type="float" >0.025514359908336087</u_equivalent>
                 </value>
                </adps>
               </value>
              </site>
              <annotations type="Annotations" >
               <annotations type="Container" >
                <count type="int" >1</count>
                <item type="Handle" >
                 <serial_number type="int" >77</serial_number>
                 <value type="FileOrdering" >
                  <value type="Handle" >
                   <serial_number type="int" >78</serial_number>
                   <value type="FileOrdering" >
                    <file_order type="int" >11</file_order>
                   </value>
                  </value>
                 </value>
                </item>
               </annotations>
              </annotations>
             </value>
            </item>
            <item type="Handle" >
             <serial_number type="int" >79</serial_number>
             <value type="Atom3d" >
              <element type="Element" >
               <code type="char" >2</code>
              </element>
              <formal_charge type="int" >0</formal_charge>
              <radius type="float" >0.23000000000000001</radius>
              <label type="string" >H5A</label>
              <site type="Handle" >
               <serial_number type="int" >80</serial_number>
               <value type="Site" >
                <orthogonal type="Point" >
                 <coordinates type="Vector" >
                  <vector type="Container" >
                   <count type="int" >3</count>
                   <item type="float" >3.209092334334394</item>
                   <item type="float" >3.6495286800000004</item>
                   <item type="float" >7.4015903301416559</item>
                  </vector>
                 </coordinates>
                </orthogonal>
                <fractional type="Point" >
                 <coordinates type="Vector" >
                  <vector type="Container" >
                   <count type="int" >3</count>
                   <item type="float" >0.39539999999999997</item>
                   <item type="float" >0.36120000000000002</item>
                   <item type="float" >0.41339999999999999</item>
                  </vector>
                 </coordinates>
                </fractional>
                <uncertain_value type="UncertainValue" >
                 <value type="float" >1</value>
                 <uncertainty type="Uncertainty" >
                  <precision type="int" >0</precision>
                  <uncertainty type="int" >0</uncertainty>
                 </uncertainty>
                </uncertain_value>
                <uncertainty type="Handle" >
                 <serial_number type="int" >81</serial_number>
                 <value type="Container" >
                  <count type="int" >3</count>
                  <item type="Uncertainty" >
                   <precision type="int" >4</precision>
                   <uncertainty type="int" >0</uncertainty>
                  </item>
                  <item type="Uncertainty" >
                   <precision type="int" >4</precision>
                   <uncertainty type="int" >0</uncertainty>
                  </item>
                  <item type="Uncertainty" >
                   <precision type="int" >4</precision>
                   <uncertainty type="int" >0</uncertainty>
                  </item>
                 </value>
                </uncertainty>
                <adps type="Handle" >
                 <serial_number type="int" >82</serial_number>
                 <value type="AtomicDisplacementParameters" >
                  <uvalues type="Container" >
                   <count type="int" >6</count>
                   <item type="UncertainValue" >
                    <value type="float" >0.038000000000000006</value>
                    <uncertainty type="Uncertainty" >
                     <precision type="int" >1000000</precision>
                     <uncertainty type="int" >0</uncertainty>
                    </uncertainty>
                   </item>
                   <item type="UncertainValue" >
                    <value type="float" >0.038000000000000006</value>
                    <uncertainty type="Uncertainty" >
                     <precision type="int" >1000000</precision>
                     <uncertainty type="int" >0</uncertainty>
                    </uncertainty>
                   </item>
                   <item type="UncertainValue" >
                    <value type="float" >0.037999999999999992</value>
                    <uncertainty type="Uncertainty" >
                     <precision type="int" >1000000</precision>
                     <uncertainty type="int" >0</uncertainty>
                    </uncertainty>
                   </item>
                   <item type="UncertainValue" >
                    <value type="float" >-3.1517131600796144e-18</value>
                    <uncertainty type="Uncertainty" >
                     <precision type="int" >1000000</precision>
                     <uncertainty type="int" >0</uncertainty>
                    </uncertainty>
                   </item>
                   <item type="UncertainValue" >
                    <value type="float" >0.011189378943005273</value>
                    <uncertainty type="Uncertainty" >
                     <precision type="int" >1000000</precision>
                     <uncertainty type="int" >0</uncertainty>
                    </uncertainty>
                   </item>
                   <item type="UncertainValue" >
                    <value type="float" >-3.1517131600796136e-18</value>
                    <uncertainty type="Uncertainty" >
                     <precision type="int" >1000000</precision>
                     <uncertainty type="int" >0</uncertainty>
                    </uncertainty>
                   </item>
                  </uvalues>
                  <type type="AtomicDisplacementParameters::Type" >
                   <enumerator type="int" >1</enumerator>
                  </type>
                  <u_equivalent type="float" >0.037999999999999999</u_equivalent>
                 </value>
                </adps>
               </value>
              </site>
              <annotations type="Annotations" >
               <annotations type="Container" >
                <count type="int" >1</count>
                <item type="Handle" >
                 <serial_number type="int" >83</serial_number>
                 <value type="FileOrdering" >
                  <value type="Handle" >
                   <serial_number type="int" >84</serial_number>
                   <value type="FileOrdering" >
                    <file_order type="int" >12</file_order>
                   </value>
                  </value>
                 </value>
                </item>
               </annotations>
              </annotations>
             </value>
            </item>
            <item type="Handle" >
             <serial_number type="int" >85</serial_number>
             <value type="Atom3d" >
              <element type="Element" >
               <code type="char" >2</code>
              </element>
              <formal_charge type="int" >0</formal_charge>
              <radius type="float" >0.23000000000000001</radius>
              <label type="string" >H5B</label>
              <site type="Handle" >
               <serial_number type="int" >86</serial_number>
               <value type="Site" >
                <orthogonal type="Point" >
                 <coordinates type="Vector" >
                  <vector type="Container" >
                   <count type="int" >3</count>
                   <item type="float" >2.0966985831936467</item>
                   <item type="float" >2.5290061700000006</item>
                   <item type="float" >7.6594106028896967</item>
                  </vector>
                 </coordinates>
                </orthogonal>
                <fractional type="Point" >
                 <coordinates type="Vector" >
                  <vector type="Container" >
                   <count type="int" >3</count>
                   <item type="float" >0.32100000000000001</item>
                   <item type="float" >0.25030000000000002</item>
                   <item type="float" >0.42780000000000001</item>
                  </vector>
                 </coordinates>
                </fractional>
                <uncertain_value type="UncertainValue" >
                 <value type="float" >1</value>
                 <uncertainty type="Uncertainty" >
                  <precision type="int" >0</precision>
                  <uncertainty type="int" >0</uncertainty>
                 </uncertainty>
                </uncertain_value>
                <uncertainty type="Handle" >
                 <serial_number type="int" >87</serial_number>
                 <value type="Container" >
                  <count type="int" >3</count>
                  <item type="Uncertainty" >
                   <precision type="int" >4</precision>
                   <uncertainty type="int" >0</uncertainty>
                  </item>
                  <item type="Uncertainty" >
                   <precision type="int" >4</precision>
                   <uncertainty type="int" >0</uncertainty>
                  </item>
                  <item type="Uncertainty" >
                   <precision type="int" >4</precision>
                   <uncertainty type="int" >0</uncertainty>
                  </item>
                 </value>
                </uncertainty>
                <adps type="Handle" >
                 <serial_number type="int" >88</serial_number>
                 <value type="AtomicDisplacementParameters" >
                  <uvalues type="Container" >
                   <count type="int" >6</count>
                   <item type="UncertainValue" >
                    <value type="float" >0.038000000000000006</value>
                    <uncertainty type="Uncertainty" >
                     <precision type="int" >1000000</precision>
                     <uncertainty type="int" >0</uncertainty>
                    </uncertainty>
                   </item>
                   <item type="UncertainValue" >
                    <value type="float" >0.038000000000000006</value>
                    <uncertainty type="Uncertainty" >
                     <precision type="int" >1000000</precision>
                     <uncertainty type="int" >0</uncertainty>
                    </uncertainty>
                   </item>
                   <item type="UncertainValue" >
                    <value type="float" >0.037999999999999992</value>
                    <uncertainty type="Uncertainty" >
                     <precision type="int" >1000000</precision>
                     <uncertainty type="int" >0</uncertainty>
                    </uncertainty>
                   </item>
                   <item type="UncertainValue" >
                    <value type="float" >-3.1517131600796144e-18</value>
                    <uncertainty type="Uncertainty" >
                     <precision type="int" >1000000</precision>
                     <uncertainty type="int" >0</uncertainty>
                    </uncertainty>
                   </item>
                   <item type="UncertainValue" >
                    <value type="float" >0.011189378943005273</value>
                    <uncertainty type="Uncertainty" >
                     <precision type="int" >1000000</precision>
                     <uncertainty type="int" >0</uncertainty>
                    </uncertainty>
                   </item>
                   <item type="UncertainValue" >
                    <value type="float" >-3.1517131600796136e-18</value>
                    <uncertainty type="Uncertainty" >
                     <precision type="int" >1000000</precision>
                     <uncertainty type="int" >0</uncertainty>
                    </uncertainty>
                   </item>
                  </uvalues>
                  <type type="AtomicDisplacementParameters::Type" >
                   <enumerator type="int" >1</enumerator>
                  </type>
                  <u_equivalent type="float" >0.037999999999999999</u_equivalent>
                 </value>
                </adps>
               </value>
              </site>
              <annotations type="Annotations" >
               <annotations type="Container" >
                <count type="int" >1</count>
                <item type="Handle" >
                 <serial_number type="int" >89</serial_number>
                 <value type="FileOrdering" >
                  <value type="Handle" >
                   <serial_number type="int" >90</serial_number>
                   <value type="FileOrdering" >
                    <file_order type="int" >13</file_order>
                   </value>
                  </value>
                 </value>
                </item>
               </annotations>
              </annotations>
             </value>
            </item>
            <item type="Handle" >
             <serial_number type="int" >91</serial_number>
             <value type="Atom3d" >
              <element type="Element" >
               <code type="char" >2</code>
              </element>
              <formal_charge type="int" >0</formal_charge>
              <radius type="float" >0.23000000000000001</radius>
              <label type="string" >H5C</label>
              <site type="Handle" >
               <serial_number type="int" >92</serial_number>
               <value type="Site" >
                <orthogonal type="Point" >
                 <coordinates type="Vector" >
                  <vector type="Container" >
                   <count type="int" >3</count>
                   <item type="float" >2.15405231483689</item>
                   <item type="float" >3.2908402300000001</item>
                   <item type="float" >6.252141614139977</item>
                  </vector>
                 </coordinates>
                </orthogonal>
                <fractional type="Point" >
                 <coordinates type="Vector" >
                  <vector type="Container" >
                   <count type="int" >3</count>
                   <item type="float" >0.29389999999999999</item>
                   <item type="float" >0.32569999999999999</item>
                   <item type="float" >0.34920000000000001</item>
                  </vector>
                 </coordinates>
                </fractional>
                <uncertain_value type="UncertainValue" >
                 <value type="float" >1</value>
                 <uncertainty type="Uncertainty" >
                  <precision type="int" >0</precision>
                  <uncertainty type="int" >0</uncertainty>
                 </uncertainty>
                </uncertain_value>
                <uncertainty type="Handle" >
                 <serial_number type="int" >93</serial_number>
                 <value type="Container" >
                  <count type="int" >3</count>
                  <item type="Uncertainty" >
                   <precision type="int" >4</precision>
                   <uncertainty type="int" >0</uncertainty>
                  </item>
                  <item type="Uncertainty" >
                   <precision type="int" >4</precision>
                   <uncertainty type="int" >0</uncertainty>
                  </item>
                  <item type="Uncertainty" >
                   <precision type="int" >4</precision>
                   <uncertainty type="int" >0</uncertainty>
                  </item>
                 </value>
                </uncertainty>
                <adps type="Handle" >
                 <serial_number type="int" >94</serial_number>
                 <value type="AtomicDisplacementParameters" >
                  <uvalues type="Container" >
                   <count type="int" >6</count>
                   <item type="UncertainValue" >
                    <value type="float" >0.038000000000000006</value>
                    <uncertainty type="Uncertainty" >
                     <precision type="int" >1000000</precision>
                     <uncertainty type="int" >0</uncertainty>
                    </uncertainty>
                   </item>
                   <item type="UncertainValue" >
                    <value type="float" >0.038000000000000006</value>
                    <uncertainty type="Uncertainty" >
                     <precision type="int" >1000000</precision>
                     <uncertainty type="int" >0</uncertainty>
                    </uncertainty>
                   </item>
                   <item type="UncertainValue" >
                    <value type="float" >0.037999999999999992</value>
                    <uncertainty type="Uncertainty" >
                     <precision type="int" >1000000</precision>
                     <uncertainty type="int" >0</uncertainty>
                    </uncertainty>
                   </item>
                   <item type="UncertainValue" >
                    <value type="float" >-3.1517131600796144e-18</value>
                    <uncertainty type="Uncertainty" >
                     <precision type="int" >1000000</precision>
                     <uncertainty type="int" >0</uncertainty>
                    </uncertainty>
                   </item>
                   <item type="UncertainValue" >
                    <value type="float" >0.011189378943005273</value>
                    <uncertainty type="Uncertainty" >
                     <precision type="int" >1000000</precision>
                     <uncertainty type="int" >0</uncertainty>
                    </uncertainty>
                   </item>
                   <item type="UncertainValue" >
                    <value type="float" >-3.1517131600796136e-18</value>
                    <uncertainty type="Uncertainty" >
                     <precision type="int" >1000000</precision>
                     <uncertainty type="int" >0</uncertainty>
                    </uncertainty>
                   </item>
                  </uvalues>
                  <type type="AtomicDisplacementParameters::Type" >
                   <enumerator type="int" >1</enumerator>
                  </type>
                  <u_equivalent type="float" >0.037999999999999999</u_equivalent>
                 </value>
                </adps>
               </value>
              </site>
              <annotations type="Annotations" >
               <annotations type="Container" >
                <count type="int" >1</count>
                <item type="Handle" >
                 <serial_number type="int" >95</serial_number>
                 <value type="FileOrdering" >
                  <value type="Handle" >
                   <serial_number type="int" >96</serial_number>
                   <value type="FileOrdering" >
                    <file_order type="int" >14</file_order>
                   </value>
                  </value>
                 </value>
                </item>
               </annotations>
              </annotations>
             </value>
            </item>
            <item type="Handle" >
             <serial_number type="int" >97</serial_number>
             <value type="Atom3d" >
              <element type="Element" >
               <code type="char" >1</code>
              </element>
              <formal_charge type="int" >0</formal_charge>
              <radius type="float" >0.68000000000000005</radius>
              <label type="string" >C6</label>
              <site type="Handle" >
               <serial_number type="int" >98</serial_number>
               <value type="Site" >
                <orthogonal type="Point" >
                 <coordinates type="Vector" >
                  <vector type="Container" >
                   <count type="int" >3</count>
                   <item type="float" >2.7132217621632</item>
                   <item type="float" >-0.55207709599999943</item>
                   <item type="float" >6.5817576711741026</item>
                  </vector>
                 </coordinates>
                </orthogonal>
                <fractional type="Point" >
                 <coordinates type="Vector" >
                  <vector type="Container" >
                   <count type="int" >3</count>
                   <item type="float" >0.34149000000000002</item>
                   <item type="float" >-0.054640000000000001</item>
                   <item type="float" >0.36760999999999999</item>
                  </vector>
                 </coordinates>
                </fractional>
                <uncertain_value type="UncertainValue" >
                 <value type="float" >1</value>
                 <uncertainty type="Uncertainty" >
                  <precision type="int" >0</precision>
                  <uncertainty type="int" >0</uncertainty>
                 </uncertainty>
                </uncertain_value>
                <uncertainty type="Handle" >
                 <serial_number type="int" >99</serial_number>
                 <value type="Container" >
                  <count type="int" >3</count>
                  <item type="Uncertainty" >
                   <precision type="int" >5</precision>
                   <uncertainty type="int" >16</uncertainty>
                  </item>
                  <item type="Uncertainty" >
                   <precision type="int" >5</precision>
                   <uncertainty type="int" >19</uncertainty>
                  </item>
                  <item type="Uncertainty" >
                   <precision type="int" >5</precision>
                   <uncertainty type="int" >11</uncertainty>
                  </item>
                 </value>
                </uncertainty>
                <adps type="Handle" >
                 <serial_number type="int" >100</serial_number>
                 <value type="AtomicDisplacementParameters" >
                  <uvalues type="Container" >
                   <count type="int" >6</count>
                   <item type="UncertainValue" >
                    <value type="float" >0.037900000000000003</value>
                    <uncertainty type="Uncertainty" >
                     <precision type="int" >4</precision>
                     <uncertainty type="int" >11</uncertainty>
                    </uncertainty>
                   </item>
                   <item type="UncertainValue" >
                    <value type="float" >0.019300000000000001</value>
                    <uncertainty type="Uncertainty" >
                     <precision type="int" >4</precision>
                     <uncertainty type="int" >9</uncertainty>
                    </uncertainty>
                   </item>
                   <item type="UncertainValue" >
                    <value type="float" >0.027</value>
                    <uncertainty type="Uncertainty" >
                     <precision type="int" >4</precision>
                     <uncertainty type="int" >10</uncertainty>
                    </uncertainty>
                   </item>
                   <item type="UncertainValue" >
                    <value type="float" >-0.00080000000000000004</value>
                    <uncertainty type="Uncertainty" >
                     <precision type="int" >4</precision>
                     <uncertainty type="int" >8</uncertainty>
                    </uncertainty>
                   </item>
                   <item type="UncertainValue" >
                    <value type="float" >0.0155</value>
                    <uncertainty type="Uncertainty" >
                     <precision type="int" >4</precision>
                     <uncertainty type="int" >9</uncertainty>
                    </uncertainty>
                   </item>
                   <item type="UncertainValue" >
                    <value type="float" >0.0033</value>
                    <uncertainty type="Uncertainty" >
                     <precision type="int" >4</precision>
                     <uncertainty type="int" >7</uncertainty>
                    </uncertainty>
                   </item>
                  </uvalues>
                  <type type="AtomicDisplacementParameters::Type" >
                   <enumerator type="int" >0</enumerator>
                  </type>
                  <u_equivalent type="float" >0.026788870190248375</u_equivalent>
                 </value>
                </adps>
               </value>
              </site>
              <annotations type="Annotations" >
               <annotations type="Container" >
                <count type="int" >1</count>
                <item type="Handle" >
                 <serial_number type="int" >101</serial_number>
                 <value type="FileOrdering" >
                  <value type="Handle" >
                   <serial_number type="int" >102</serial_number>
                   <value type="FileOrdering" >
                    <file_order type="int" >15</file_order>
                   </value>
                  </value>
                 </value>
                </item>
               </annotations>
              </annotations>
             </value>
            </item>
            <item type="Handle" >
             <serial_number type="int" >103</serial_number>
             <value type="Atom3d" >
              <element type="Element" >
               <code type="char" >2</code>
              </element>
              <formal_charge type="int" >0</formal_charge>
              <radius type="float" >0.23000000000000001</radius>
              <label type="string" >H6A</label>
              <site type="Handle" >
               <serial_number type="int" >104</serial_number>
               <value type="Site" >
                <orthogonal type="Point" >
                 <coordinates type="Vector" >
                  <vector type="Container" >
                   <count type="int" >3</count>
                   <item type="float" >2.264146467823315</item>
                   <item type="float" >-1.2397485299999995</item>
                   <item type="float" >6.0480338982144444</item>
                  </vector>
                 </coordinates>
                </orthogonal>
                <fractional type="Point" >
                 <coordinates type="Vector" >
                  <vector type="Container" >
                   <count type="int" >3</count>
                   <item type="float" >0.29730000000000001</item>
                   <item type="float" >-0.1227</item>
                   <item type="float" >0.33779999999999999</item>
                  </vector>
                 </coordinates>
                </fractional>
                <uncertain_value type="UncertainValue" >
                 <value type="float" >1</value>
                 <uncertainty type="Uncertainty" >
                  <precision type="int" >0</precision>
                  <uncertainty type="int" >0</uncertainty>
                 </uncertainty>
                </uncertain_value>
                <uncertainty type="Handle" >
                 <serial_number type="int" >105</serial_number>
                 <value type="Container" >
                  <count type="int" >3</count>
                  <item type="Uncertainty" >
                   <precision type="int" >4</precision>
                   <uncertainty type="int" >0</uncertainty>
                  </item>
                  <item type="Uncertainty" >
                   <precision type="int" >4</precision>
                   <uncertainty type="int" >0</uncertainty>
                  </item>
                  <item type="Uncertainty" >
                   <precision type="int" >4</precision>
                   <uncertainty type="int" >0</uncertainty>
                  </item>
                 </value>
                </uncertainty>
                <adps type="Handle" >
                 <serial_number type="int" >106</serial_number>
                 <value type="AtomicDisplacementParameters" >
                  <uvalues type="Container" >
                   <count type="int" >6</count>
                   <item type="UncertainValue" >
                    <value type="float" >0.040000000000000008</value>
                    <uncertainty type="Uncertainty" >
                     <precision type="int" >1000000</precision>
                     <uncertainty type="int" >0</uncertainty>
                    </uncertainty>
                   </item>
                   <item type="UncertainValue" >
                    <value type="float" >0.040000000000000008</value>
                    <uncertainty type="Uncertainty" >
                     <precision type="int" >1000000</precision>
                     <uncertainty type="int" >0</uncertainty>
                    </uncertainty>
                   </item>
                   <item type="UncertainValue" >
                    <value type="float" >0.040000000000000008</value>
                    <uncertainty type="Uncertainty" >
                     <precision type="int" >1000000</precision>
                     <uncertainty type="int" >0</uncertainty>
                    </uncertainty>
                   </item>
                   <item type="UncertainValue" >
                    <value type="float" >-3.3175928000838052e-18</value>
                    <uncertainty type="Uncertainty" >
                     <precision type="int" >1000000</precision>
                     <uncertainty type="int" >0</uncertainty>
                    </uncertainty>
                   </item>
                   <item type="UncertainValue" >
                    <value type="float" >0.011778293624216077</value>
                    <uncertainty type="Uncertainty" >
                     <precision type="int" >1000000</precision>
                     <uncertainty type="int" >0</uncertainty>
                    </uncertainty>
                   </item>
                   <item type="UncertainValue" >
                    <value type="float" >-3.317592800083804e-18</value>
                    <uncertainty type="Uncertainty" >
                     <precision type="int" >1000000</precision>
                     <uncertainty type="int" >0</uncertainty>
                    </uncertainty>
                   </item>
                  </uvalues>
                  <type type="AtomicDisplacementParameters::Type" >
                   <enumerator type="int" >1</enumerator>
                  </type>
                  <u_equivalent type="float" >0.040000000000000001</u_equivalent>
                 </value>
                </adps>
               </value>
              </site>
              <annotations type="Annotations" >
               <annotations type="Container" >
                <count type="int" >1</count>
                <item type="Handle" >
                 <serial_number type="int" >107</serial_number>
                 <value type="FileOrdering" >
                  <value type="Handle" >
                   <serial_number type="int" >108</serial_number>
                   <value type="FileOrdering" >
                    <file_order type="int" >16</file_order>
                   </value>
                  </value>
                 </value>
                </item>
               </annotations>
              </annotations>
             </value>
            </item>
            <item type="Handle" >
             <serial_number type="int" >109</serial_number>
             <value type="Atom3d" >
              <element type="Element" >
               <code type="char" >2</code>
              </element>
              <formal_charge type="int" >0</formal_charge>
              <radius type="float" >0.23000000000000001</radius>
              <label type="string" >H6B</label>
              <site type="Handle" >
               <serial_number type="int" >110</serial_number>
               <value type="Site" >
                <orthogonal type="Point" >
                 <coordinates type="Vector" >
                  <vector type="Container" >
                   <count type="int" >3</count>
                   <item type="float" >2.1527094526117607</item>
                   <item type="float" >-0.31827284999999939</item>
                   <item type="float" >7.3514586104406483</item>
                  </vector>
                 </coordinates>
                </orthogonal>
                <fractional type="Point" >
                 <coordinates type="Vector" >
                  <vector type="Container" >
                   <count type="int" >3</count>
                   <item type="float" >0.31819999999999998</item>
                   <item type="float" >-0.0315</item>
                   <item type="float" >0.41060000000000002</item>
                  </vector>
                 </coordinates>
                </fractional>
                <uncertain_value type="UncertainValue" >
                 <value type="float" >1</value>
                 <uncertainty type="Uncertainty" >
                  <precision type="int" >0</precision>
                  <uncertainty type="int" >0</uncertainty>
                 </uncertainty>
                </uncertain_value>
                <uncertainty type="Handle" >
                 <serial_number type="int" >111</serial_number>
                 <value type="Container" >
                  <count type="int" >3</count>
                  <item type="Uncertainty" >
                   <precision type="int" >4</precision>
                   <uncertainty type="int" >0</uncertainty>
                  </item>
                  <item type="Uncertainty" >
                   <precision type="int" >4</precision>
                   <uncertainty type="int" >0</uncertainty>
                  </item>
                  <item type="Uncertainty" >
                   <precision type="int" >4</precision>
                   <uncertainty type="int" >0</uncertainty>
                  </item>
                 </value>
                </uncertainty>
                <adps type="Handle" >
                 <serial_number type="int" >112</serial_number>
                 <value type="AtomicDisplacementParameters" >
                  <uvalues type="Container" >
                   <count type="int" >6</count>
                   <item type="UncertainValue" >
                    <value type="float" >0.040000000000000008</value>
                    <uncertainty type="Uncertainty" >
                     <precision type="int" >1000000</precision>
                     <uncertainty type="int" >0</uncertainty>
                    </uncertainty>
                   </item>
                   <item type="UncertainValue" >
                    <value type="float" >0.040000000000000008</value>
                    <uncertainty type="Uncertainty" >
                     <precision type="int" >1000000</precision>
                     <uncertainty type="int" >0</uncertainty>
                    </uncertainty>
                   </item>
                   <item type="UncertainValue" >
                    <value type="float" >0.040000000000000008</value>
                    <uncertainty type="Uncertainty" >
                     <precision type="int" >1000000</precision>
                     <uncertainty type="int" >0</uncertainty>
                    </uncertainty>
                   </item>
                   <item type="UncertainValue" >
                    <value type="float" >-3.3175928000838052e-18</value>
                    <uncertainty type="Uncertainty" >
                     <precision type="int" >1000000</precision>
                     <uncertainty type="int" >0</uncertainty>
                    </uncertainty>
                   </item>
                   <item type="UncertainValue" >
                    <value type="float" >0.011778293624216077</value>
                    <uncertainty type="Uncertainty" >
                     <precision type="int" >1000000</precision>
                     <uncertainty type="int" >0</uncertainty>
                    </uncertainty>
                   </item>
                   <item type="UncertainValue" >
                    <value type="float" >-3.317592800083804e-18</value>
                    <uncertainty type="Uncertainty" >
                     <precision type="int" >1000000</precision>
                     <uncertainty type="int" >0</uncertainty>
                    </uncertainty>
                   </item>
                  </uvalues>
                  <type type="AtomicDisplacementParameters::Type" >
                   <enumerator type="int" >1</enumerator>
                  </type>
                  <u_equivalent type="float" >0.040000000000000001</u_equivalent>
                 </value>
                </adps>
               </value>
              </site>
              <annotations type="Annotations" >
               <annotations type="Container" >
                <count type="int" >1</count>
                <item type="Handle" >
                 <serial_number type="int" >113</serial_number>
                 <value type="FileOrdering" >
                  <value type="Handle" >
                   <serial_number type="int" >114</serial_number>
                   <value type="FileOrdering" >
                    <file_order type="int" >17</file_order>
                   </value>
                  </value>
                 </value>
                </item>
               </annotations>
              </annotations>
             </value>
            </item>
            <item type="Handle" >
             <serial_number type="int" >115</serial_number>
             <value type="Atom3d" >
              <element type="Element" >
               <code type="char" >2</code>
              </element>
              <formal_charge type="int" >0</formal_charge>
              <radius type="float" >0.23000000000000001</radius>
              <label type="string" >H6C</label>
              <site type="Handle" >
               <serial_number type="int" >116</serial_number>
               <value type="Site" >
                <orthogonal type="Point" >
                 <coordinates type="Vector" >
                  <vector type="Container" >
                   <count type="int" >3</count>
                   <item type="float" >3.5751425370465459</item>
                   <item type="float" >-0.89520553999999941</item>
                   <item type="float" >6.898482714570827</item>
                  </vector>
                 </coordinates>
                </orthogonal>
                <fractional type="Point" >
                 <coordinates type="Vector" >
                  <vector type="Container" >
                   <count type="int" >3</count>
                   <item type="float" >0.41060000000000002</item>
                   <item type="float" >-0.088599999999999998</item>
                   <item type="float" >0.38529999999999998</item>
                  </vector>
                 </coordinates>
                </fractional>
                <uncertain_value type="UncertainValue" >
                 <value type="float" >1</value>
                 <uncertainty type="Uncertainty" >
                  <precision type="int" >0</precision>
                  <uncertainty type="int" >0</uncertainty>
                 </uncertainty>
                </uncertain_value>
                <uncertainty type="Handle" >
                 <serial_number type="int" >117</serial_number>
                 <value type="Container" >
                  <count type="int" >3</count>
                  <item type="Uncertainty" >
                   <precision type="int" >4</precision>
                   <uncertainty type="int" >0</uncertainty>
                  </item>
                  <item type="Uncertainty" >
                   <precision type="int" >4</precision>
                   <uncertainty type="int" >0</uncertainty>
                  </item>
                  <item type="Uncertainty" >
                   <precision type="int" >4</precision>
                   <uncertainty type="int" >0</uncertainty>
                  </item>
                 </value>
                </uncertainty>
                <adps type="Handle" >
                 <serial_number type="int" >118</serial_number>
                 <value type="AtomicDisplacementParameters" >
                  <uvalues type="Container" >
                   <count type="int" >6</count>
                   <item type="UncertainValue" >
                    <value type="float" >0.040000000000000008</value>
                    <uncertainty type="Uncertainty" >
                     <precision type="int" >1000000</precision>
                     <uncertainty type="int" >0</uncertainty>
                    </uncertainty>
                   </item>
                   <item type="UncertainValue" >
                    <value type="float" >0.040000000000000008</value>
                    <uncertainty type="Uncertainty" >
                     <precision type="int" >1000000</precision>
                     <uncertainty type="int" >0</uncertainty>
                    </uncertainty>
                   </item>
                   <item type="UncertainValue" >
                    <value type="float" >0.040000000000000008</value>
                    <uncertainty type="Uncertainty" >
                     <precision type="int" >1000000</precision>
                     <uncertainty type="int" >0</uncertainty>
                    </uncertainty>
                   </item>
                   <item type="UncertainValue" >
                    <value type="float" >-3.3175928000838052e-18</value>
                    <uncertainty type="Uncertainty" >
                     <precision type="int" >1000000</precision>
                     <uncertainty type="int" >0</uncertainty>
                    </uncertainty>
                   </item>
                   <item type="UncertainValue" >
                    <value type="float" >0.011778293624216077</value>
                    <uncertainty type="Uncertainty" >
                     <precision type="int" >1000000</precision>
                     <uncertainty type="int" >0</uncertainty>
                    </uncertainty>
                   </item>
                   <item type="UncertainValue" >
                    <value type="float" >-3.317592800083804e-18</value>
                    <uncertainty type="Uncertainty" >
                     <precision type="int" >1000000</precision>
                     <uncertainty type="int" >0</uncertainty>
                    </uncertainty>
                   </item>
                  </uvalues>
                  <type type="AtomicDisplacementParameters::Type" >
                   <enumerator type="int" >1</enumerator>
                  </type>
                  <u_equivalent type="float" >0.040000000000000001</u_equivalent>
                 </value>
                </adps>
               </value>
              </site>
              <annotations type="Annotations" >
               <annotations type="Container" >
                <count type="int" >1</count>
                <item type="Handle" >
                 <serial_number type="int" >119</serial_number>
                 <value type="FileOrdering" >
                  <value type="Handle" >
                   <serial_number type="int" >120</serial_number>
                   <value type="FileOrdering" >
                    <file_order type="int" >18</file_order>
                   </value>
                  </value>
                 </value>
                </item>
               </annotations>
              </annotations>
             </value>
            </item>
            <item type="Handle" >
             <serial_number type="int" >121</serial_number>
             <value type="Atom3d" >
              <element type="Element" >
               <code type="char" >1</code>
              </element>
              <formal_charge type="int" >0</formal_charge>
              <radius type="float" >0.68000000000000005</radius>
              <label type="string" >C7</label>
              <site type="Handle" >
               <serial_number type="int" >122</serial_number>
               <value type="Site" >
                <orthogonal type="Point" >
                 <coordinates type="Vector" >
                  <vector type="Container" >
                   <count type="int" >3</count>
                   <item type="float" >1.661274983580356</item>
                   <item type="float" >1.0821276900000003</item>
                   <item type="float" >4.9932983240764557</item>
                  </vector>
                 </coordinates>
                </orthogonal>
                <fractional type="Point" >
                 <coordinates type="Vector" >
                  <vector type="Container" >
                   <count type="int" >3</count>
                   <item type="float" >0.23047000000000001</item>
                   <item type="float" >0.1071</item>
                   <item type="float" >0.27889000000000003</item>
                  </vector>
                 </coordinates>
                </fractional>
                <uncertain_value type="UncertainValue" >
                 <value type="float" >1</value>
                 <uncertainty type="Uncertainty" >
                  <precision type="int" >0</precision>
                  <uncertainty type="int" >0</uncertainty>
                 </uncertainty>
                </uncertain_value>
                <uncertainty type="Handle" >
                 <serial_number type="int" >123</serial_number>
                 <value type="Container" >
                  <count type="int" >3</count>
                  <item type="Uncertainty" >
                   <precision type="int" >5</precision>
                   <uncertainty type="int" >14</uncertainty>
                  </item>
                  <item type="Uncertainty" >
                   <precision type="int" >4</precision>
                   <uncertainty type="int" >2</uncertainty>
                  </item>
                  <item type="Uncertainty" >
                   <precision type="int" >5</precision>
                   <uncertainty type="int" >11</uncertainty>
                  </item>
                 </value>
                </uncertainty>
                <adps type="Handle" >
                 <serial_number type="int" >124</serial_number>
                 <value type="AtomicDisplacementParameters" >
                  <uvalues type="Container" >
                   <count type="int" >6</count>
                   <item type="UncertainValue" >
                    <value type="float" >0.022100000000000002</value>
                    <uncertainty type="Uncertainty" >
                     <precision type="int" >4</precision>
                     <uncertainty type="int" >9</uncertainty>
                    </uncertainty>
                   </item>
                   <item type="UncertainValue" >
                    <value type="float" >0.0263</value>
                    <uncertainty type="Uncertainty" >
                     <precision type="int" >4</precision>
                     <uncertainty type="int" >10</uncertainty>
                    </uncertainty>
                   </item>
                   <item type="UncertainValue" >
                    <value type="float" >0.0269</value>
                    <uncertainty type="Uncertainty" >
                     <precision type="int" >4</precision>
                     <uncertainty type="int" >10</uncertainty>
                    </uncertainty>
                   </item>
                   <item type="UncertainValue" >
                    <value type="float" >-0.00080000000000000004</value>
                    <uncertainty type="Uncertainty" >
                     <precision type="int" >4</precision>
                     <uncertainty type="int" >7</uncertainty>
                    </uncertainty>
                   </item>
                   <item type="UncertainValue" >
                    <value type="float" >0.0079000000000000008</value>
                    <uncertainty type="Uncertainty" >
                     <precision type="int" >4</precision>
                     <uncertainty type="int" >8</uncertainty>
                    </uncertainty>
                   </item>
                   <item type="UncertainValue" >
                    <value type="float" >0.00020000000000000001</value>
                    <uncertainty type="Uncertainty" >
                     <precision type="int" >4</precision>
                     <uncertainty type="int" >8</uncertainty>
                    </uncertainty>
                   </item>
                  </uvalues>
                  <type type="AtomicDisplacementParameters::Type" >
                   <enumerator type="int" >0</enumerator>
                  </type>
                  <u_equivalent type="float" >0.024952594218132645</u_equivalent>
                 </value>
                </adps>
               </value>
              </site>
              <annotations type="Annotations" >
               <annotations type="Container" >
                <count type="int" >1</count>
                <item type="Handle" >
                 <serial_number type="int" >125</serial_number>
                 <value type="FileOrdering" >
                  <value type="Handle" >
                   <serial_number type="int" >126</serial_number>
                   <value type="FileOrdering" >
                    <file_order type="int" >19</file_order>
                   </value>
                  </value>
                 </value>
                </item>
               </annotations>
              </annotations>
             </value>
            </item>
            <item type="Handle" >
             <serial_number type="int" >127</serial_number>
             <value type="Atom3d" >
              <element type="Element" >
               <code type="char" >2</code>
              </element>
              <formal_charge type="int" >0</formal_charge>
              <radius type="float" >0.23000000000000001</radius>
              <label type="string" >H7A</label>
              <site type="Handle" >
               <serial_number type="int" >128</serial_number>
               <value type="Site" >
                <orthogonal type="Point" >
                 <coordinates type="Vector" >
                  <vector type="Container" >
                   <count type="int" >3</count>
                   <item type="float" >1.8384894926375503</item>
                   <item type="float" >1.8732630600000004</item>
                   <item type="float" >4.4420284492214437</item>
                  </vector>
                 </coordinates>
                </orthogonal>
                <fractional type="Point" >
                 <coordinates type="Vector" >
                  <vector type="Container" >
                   <count type="int" >3</count>
                   <item type="float" >0.23100000000000001</item>
                   <item type="float" >0.18540000000000001</item>
                   <item type="float" >0.24809999999999999</item>
                  </vector>
                 </coordinates>
                </fractional>
                <uncertain_value type="UncertainValue" >
                 <value type="float" >1</value>
                 <uncertainty type="Uncertainty" >
                  <precision type="int" >0</precision>
                  <uncertainty type="int" >0</uncertainty>
                 </uncertainty>
                </uncertain_value>
                <uncertainty type="Handle" >
                 <serial_number type="int" >129</serial_number>
                 <value type="Container" >
                  <count type="int" >3</count>
                  <item type="Uncertainty" >
                   <precision type="int" >4</precision>
                   <uncertainty type="int" >0</uncertainty>
                  </item>
                  <item type="Uncertainty" >
                   <precision type="int" >4</precision>
                   <uncertainty type="int" >0</uncertainty>
                  </item>
                  <item type="Uncertainty" >
                   <precision type="int" >4</precision>
                   <uncertainty type="int" >0</uncertainty>
                  </item>
                 </value>
                </uncertainty>
                <adps type="Handle" >
                 <serial_number type="int" >130</serial_number>
                 <value type="AtomicDisplacementParameters" >
                  <uvalues type="Container" >
                   <count type="int" >6</count>
                   <item type="UncertainValue" >
                    <value type="float" >0.037000000000000012</value>
                    <uncertainty type="Uncertainty" >
                     <precision type="int" >1000000</precision>
                     <uncertainty type="int" >0</uncertainty>
                    </uncertainty>
                   </item>
                   <item type="UncertainValue" >
                    <value type="float" >0.037000000000000005</value>
                    <uncertainty type="Uncertainty" >
                     <precision type="int" >1000000</precision>
                     <uncertainty type="int" >0</uncertainty>
                    </uncertainty>
                   </item>
                   <item type="UncertainValue" >
                    <value type="float" >0.036999999999999998</value>
                    <uncertainty type="Uncertainty" >
                     <precision type="int" >1000000</precision>
                     <uncertainty type="int" >0</uncertainty>
                    </uncertainty>
                   </item>
                   <item type="UncertainValue" >
                    <value type="float" >-3.0687733400775197e-18</value>
                    <uncertainty type="Uncertainty" >
                     <precision type="int" >1000000</precision>
                     <uncertainty type="int" >0</uncertainty>
                    </uncertainty>
                   </item>
                   <item type="UncertainValue" >
                    <value type="float" >0.01089492160239987</value>
                    <uncertainty type="Uncertainty" >
                     <precision type="int" >1000000</precision>
                     <uncertainty type="int" >0</uncertainty>
                    </uncertainty>
                   </item>
                   <item type="UncertainValue" >
                    <value type="float" >-3.0687733400775182e-18</value>
                    <uncertainty type="Uncertainty" >
                     <precision type="int" >1000000</precision>
                     <uncertainty type="int" >0</uncertainty>
                    </uncertainty>
                   </item>
                  </uvalues>
                  <type type="AtomicDisplacementParameters::Type" >
                   <enumerator type="int" >1</enumerator>
                  </type>
                  <u_equivalent type="float" >0.036999999999999998</u_equivalent>
                 </value>
                </adps>
               </value>
              </site>
              <annotations type="Annotations" >
               <annotations type="Container" >
                <count type="int" >1</count>
                <item type="Handle" >
                 <serial_number type="int" >131</serial_number>
                 <value type="FileOrdering" >
                  <value type="Handle" >
                   <serial_number type="int" >132</serial_number>
                   <value type="FileOrdering" >
                    <file_order type="int" >20</file_order>
                   </value>
                  </value>
                 </value>
                </item>
               </annotations>
              </annotations>
             </value>
            </item>
            <item type="Handle" >
             <serial_number type="int" >133</serial_number>
             <value type="Atom3d" >
              <element type="Element" >
               <code type="char" >2</code>
              </element>
              <formal_charge type="int" >0</formal_charge>
              <radius type="float" >0.23000000000000001</radius>
              <label type="string" >H7B</label>
              <site type="Handle" >
               <serial_number type="int" >134</serial_number>
               <value type="Site" >
                <orthogonal type="Point" >
                 <coordinates type="Vector" >
                  <vector type="Container" >
                   <count type="int" >3</count>
                   <item type="float" >0.95962693398073107</item>
                   <item type="float" >1.2902680300000005</item>
                   <item type="float" >5.6451897220456324</item>
                  </vector>
                 </coordinates>
                </orthogonal>
                <fractional type="Point" >
                 <coordinates type="Vector" >
                  <vector type="Container" >
                   <count type="int" >3</count>
                   <item type="float" >0.19439999999999999</item>
                   <item type="float" >0.12770000000000001</item>
                   <item type="float" >0.31530000000000002</item>
                  </vector>
                 </coordinates>
                </fractional>
                <uncertain_value type="UncertainValue" >
                 <value type="float" >1</value>
                 <uncertainty type="Uncertainty" >
                  <precision type="int" >0</precision>
                  <uncertainty type="int" >0</uncertainty>
                 </uncertainty>
                </uncertain_value>
                <uncertainty type="Handle" >
                 <serial_number type="int" >135</serial_number>
                 <value type="Container" >
                  <count type="int" >3</count>
                  <item type="Uncertainty" >
                   <precision type="int" >4</precision>
                   <uncertainty type="int" >0</uncertainty>
                  </item>
                  <item type="Uncertainty" >
                   <precision type="int" >4</precision>
                   <uncertainty type="int" >0</uncertainty>
                  </item>
                  <item type="Uncertainty" >
                   <precision type="int" >4</precision>
                   <uncertainty type="int" >0</uncertainty>
                  </item>
                 </value>
                </uncertainty>
                <adps type="Handle" >
                 <serial_number type="int" >136</serial_number>
                 <value type="AtomicDisplacementParameters" >
                  <uvalues type="Container" >
                   <count type="int" >6</count>
                   <item type="UncertainValue" >
                    <value type="float" >0.037000000000000012</value>
                    <uncertainty type="Uncertainty" >
                     <precision type="int" >1000000</precision>
                     <uncertainty type="int" >0</uncertainty>
                    </uncertainty>
                   </item>
                   <item type="UncertainValue" >
                    <value type="float" >0.037000000000000005</value>
                    <uncertainty type="Uncertainty" >
                     <precision type="int" >1000000</precision>
                     <uncertainty type="int" >0</uncertainty>
                    </uncertainty>
                   </item>
                   <item type="UncertainValue" >
                    <value type="float" >0.036999999999999998</value>
                    <uncertainty type="Uncertainty" >
                     <precision type="int" >1000000</precision>
                     <uncertainty type="int" >0</uncertainty>
                    </uncertainty>
                   </item>
                   <item type="UncertainValue" >
                    <value type="float" >-3.0687733400775197e-18</value>
                    <uncertainty type="Uncertainty" >
                     <precision type="int" >1000000</precision>
                     <uncertainty type="int" >0</uncertainty>
                    </uncertainty>
                   </item>
                   <item type="UncertainValue" >
                    <value type="float" >0.01089492160239987</value>
                    <uncertainty type="Uncertainty" >
                     <precision type="int" >1000000</precision>
                     <uncertainty type="int" >0</uncertainty>
                    </uncertainty>
                   </item>
                   <item type="UncertainValue" >
                    <value type="float" >-3.0687733400775182e-18</value>
                    <uncertainty type="Uncertainty" >
                     <precision type="int" >1000000</precision>
                     <uncertainty type="int" >0</uncertainty>
                    </uncertainty>
                   </item>
                  </uvalues>
                  <type type="AtomicDisplacementParameters::Type" >
                   <enumerator type="int" >1</enumerator>
                  </type>
                  <u_equivalent type="float" >0.036999999999999998</u_equivalent>
                 </value>
                </adps>
               </value>
              </site>
              <annotations type="Annotations" >
               <annotations type="Container" >
                <count type="int" >1</count>
                <item type="Handle" >
                 <serial_number type="int" >137</serial_number>
                 <value type="FileOrdering" >
                  <value type="Handle" >
                   <serial_number type="int" >138</serial_number>
                   <value type="FileOrdering" >
                    <file_order type="int" >21</file_order>
                   </value>
                  </value>
                 </value>
                </item>
               </annotations>
              </annotations>
             </value>
            </item>
            <item type="Handle" >
             <serial_number type="int" >139</serial_number>
             <value type="Atom3d" >
              <element type="Element" >
               <code type="char" >2</code>
              </element>
              <formal_charge type="int" >0</formal_charge>
              <radius type="float" >0.23000000000000001</radius>
              <label type="string" >H7C</label>
              <site type="Handle" >
               <serial_number type="int" >140</serial_number>
               <value type="Site" >
                <orthogonal type="Point" >
                 <coordinates type="Vector" >
                  <vector type="Container" >
                   <count type="int" >3</count>
                   <item type="float" >1.3675066918992784</item>
                   <item type="float" >0.34353260000000041</item>
                   <item type="float" >4.4205434264924408</item>
                  </vector>
                 </coordinates>
                </orthogonal>
                <fractional type="Point" >
                 <coordinates type="Vector" >
                  <vector type="Container" >
                   <count type="int" >3</count>
                   <item type="float" >0.1966</item>
                   <item type="float" >0.034000000000000002</item>
                   <item type="float" >0.24690000000000001</item>
                  </vector>
                 </coordinates>
                </fractional>
                <uncertain_value type="UncertainValue" >
                 <value type="float" >1</value>
                 <uncertainty type="Uncertainty" >
                  <precision type="int" >0</precision>
                  <uncertainty type="int" >0</uncertainty>
                 </uncertainty>
                </uncertain_value>
                <uncertainty type="Handle" >
                 <serial_number type="int" >141</serial_number>
                 <value type="Container" >
                  <count type="int" >3</count>
                  <item type="Uncertainty" >
                   <precision type="int" >4</precision>
                   <uncertainty type="int" >0</uncertainty>
                  </item>
                  <item type="Uncertainty" >
                   <precision type="int" >4</precision>
                   <uncertainty type="int" >0</uncertainty>
                  </item>
                  <item type="Uncertainty" >
                   <precision type="int" >4</precision>
                   <uncertainty type="int" >0</uncertainty>
                  </item>
                 </value>
                </uncertainty>
                <adps type="Handle" >
                 <serial_number type="int" >142</serial_number>
                 <value type="AtomicDisplacementParameters" >
                  <uvalues type="Container" >
                   <count type="int" >6</count>
                   <item type="UncertainValue" >
                    <value type="float" >0.037000000000000012</value>
                    <uncertainty type="Uncertainty" >
                     <precision type="int" >1000000</precision>
                     <uncertainty type="int" >0</uncertainty>
                    </uncertainty>
                   </item>
                   <item type="UncertainValue" >
                    <value type="float" >0.037000000000000005</value>
                    <uncertainty type="Uncertainty" >
                     <precision type="int" >1000000</precision>
                     <uncertainty type="int" >0</uncertainty>
                    </uncertainty>
                   </item>
                   <item type="UncertainValue" >
                    <value type="float" >0.036999999999999998</value>
                    <uncertainty type="Uncertainty" >
                     <precision type="int" >1000000</precision>
                     <uncertainty type="int" >0</uncertainty>
                    </uncertainty>
                   </item>
                   <item type="UncertainValue" >
                    <value type="float" >-3.0687733400775197e-18</value>
                    <uncertainty type="Uncertainty" >
                     <precision type="int" >1000000</precision>
                     <uncertainty type="int" >0</uncertainty>
                    </uncertainty>
                   </item>
                   <item type="UncertainValue" >
                    <value type="float" >0.01089492160239987</value>
                    <uncertainty type="Uncertainty" >
                     <precision type="int" >1000000</precision>
                     <uncertainty type="int" >0</uncertainty>
                    </uncertainty>
                   </item>
                   <item type="UncertainValue" >
                    <value type="float" >-3.0687733400775182e-18</value>
                    <uncertainty type="Uncertainty" >
                     <precision type="int" >1000000</precision>
                     <uncertainty type="int" >0</uncertainty>
                    </uncertainty>
                   </item>
                  </uvalues>
                  <type type="AtomicDisplacementParameters::Type" >
                   <enumerator type="int" >1</enumerator>
                  </type>
                  <u_equivalent type="float" >0.036999999999999998</u_equivalent>
                 </value>
                </adps>
               </value>
              </site>
              <annotations type="Annotations" >
               <annotations type="Container" >
                <count type="int" >1</count>
                <item type="Handle" >
                 <serial_number type="int" >143</serial_number>
                 <value type="FileOrdering" >
                  <value type="Handle" >
                   <serial_number type="int" >144</serial_number>
                   <value type="FileOrdering" >
                    <file_order type="int" >22</file_order>
                   </value>
                  </value>
                 </value>
                </item>
               </annotations>
              </annotations>
             </value>
            </item>
            <item type="Handle" >
             <serial_number type="int" >145</serial_number>
             <value type="Atom3d" >
              <element type="Element" >
               <code type="char" >1</code>
              </element>
              <formal_charge type="int" >0</formal_charge>
              <radius type="float" >0.68000000000000005</radius>
              <label type="string" >C8</label>
              <site type="Handle" >
               <serial_number type="int" >146</serial_number>
               <value type="Site" >
                <orthogonal type="Point" >
                 <coordinates type="Vector" >
                  <vector type="Container" >
                   <count type="int" >3</count>
                   <item type="float" >5.6818362253984409</item>
                   <item type="float" >1.6225853010000002</item>
                   <item type="float" >3.3000994911749157</item>
                  </vector>
                 </coordinates>
                </orthogonal>
                <fractional type="Point" >
                 <coordinates type="Vector" >
                  <vector type="Container" >
                   <count type="int" >3</count>
                   <item type="float" >0.48248000000000002</item>
                   <item type="float" >0.16059000000000001</item>
                   <item type="float" >0.18432000000000001</item>
                  </vector>
                 </coordinates>
                </fractional>
                <uncertain_value type="UncertainValue" >
                 <value type="float" >1</value>
                 <uncertainty type="Uncertainty" >
                  <precision type="int" >0</precision>
                  <uncertainty type="int" >0</uncertainty>
                 </uncertainty>
                </uncertain_value>
                <uncertainty type="Handle" >
                 <serial_number type="int" >147</serial_number>
                 <value type="Container" >
                  <count type="int" >3</count>
                  <item type="Uncertainty" >
                   <precision type="int" >5</precision>
                   <uncertainty type="int" >13</uncertainty>
                  </item>
                  <item type="Uncertainty" >
                   <precision type="int" >5</precision>
                   <uncertainty type="int" >17</uncertainty>
                  </item>
                  <item type="Uncertainty" >
                   <precision type="int" >5</precision>
                   <uncertainty type="int" >10</uncertainty>
                  </item>
                 </value>
                </uncertainty>
                <adps type="Handle" >
                 <serial_number type="int" >148</serial_number>
                 <value type="AtomicDisplacementParameters" >
                  <uvalues type="Container" >
                   <count type="int" >6</count>
                   <item type="UncertainValue" >
                    <value type="float" >0.021499999999999998</value>
                    <uncertainty type="Uncertainty" >
                     <precision type="int" >4</precision>
                     <uncertainty type="int" >8</uncertainty>
                    </uncertainty>
                   </item>
                   <item type="UncertainValue" >
                    <value type="float" >0.0166</value>
                    <uncertainty type="Uncertainty" >
                     <precision type="int" >4</precision>
                     <uncertainty type="int" >8</uncertainty>
                    </uncertainty>
                   </item>
                   <item type="UncertainValue" >
                    <value type="float" >0.015800000000000002</value>
                    <uncertainty type="Uncertainty" >
                     <precision type="int" >4</precision>
                     <uncertainty type="int" >8</uncertainty>
                    </uncertainty>
                   </item>
                   <item type="UncertainValue" >
                    <value type="float" >0.00069999999999999999</value>
                    <uncertainty type="Uncertainty" >
                     <precision type="int" >4</precision>
                     <uncertainty type="int" >7</uncertainty>
                    </uncertainty>
                   </item>
                   <item type="UncertainValue" >
                    <value type="float" >0.0058999999999999999</value>
                    <uncertainty type="Uncertainty" >
                     <precision type="int" >4</precision>
                     <uncertainty type="int" >7</uncertainty>
                    </uncertainty>
                   </item>
                   <item type="UncertainValue" >
                    <value type="float" >0</value>
                    <uncertainty type="Uncertainty" >
                     <precision type="int" >4</precision>
                     <uncertainty type="int" >6</uncertainty>
                    </uncertainty>
                   </item>
                  </uvalues>
                  <type type="AtomicDisplacementParameters::Type" >
                   <enumerator type="int" >0</enumerator>
                  </type>
                  <u_equivalent type="float" >0.01787889091206505</u_equivalent>
                 </value>
                </adps>
               </value>
              </site>
              <annotations type="Annotations" >
               <annotations type="Container" >
                <count type="int" >1</count>
                <item type="Handle" >
                 <serial_number type="int" >149</serial_number>
                 <value type="FileOrdering" >
                  <value type="Handle" >
                   <serial_number type="int" >150</serial_number>
                   <value type="FileOrdering" >
                    <file_order type="int" >23</file_order>
                   </value>
                  </value>
                 </value>
                </item>
               </annotations>
              </annotations>
             </value>
            </item>
            <item type="Handle" >
             <serial_number type="int" >151</serial_number>
             <value type="Atom3d" >
              <element type="Element" >
               <code type="char" >1</code>
              </element>
              <formal_charge type="int" >0</formal_charge>
              <radius type="float" >0.68000000000000005</radius>
              <label type="string" >C9</label>
              <site type="Handle" >
               <serial_number type="int" >152</serial_number>
               <value type="Site" >
                <orthogonal type="Point" >
                 <coordinates type="Vector" >
                  <vector type="Container" >
                   <count type="int" >3</count>
                   <item type="float" >7.017830127155408</item>
                   <item type="float" >1.802434721</item>
                   <item type="float" >3.6422484781342939</item>
                  </vector>
                 </coordinates>
                </orthogonal>
                <fractional type="Point" >
                 <coordinates type="Vector" >
                  <vector type="Container" >
                   <count type="int" >3</count>
                   <item type="float" >0.58630000000000004</item>
                   <item type="float" >0.17838999999999999</item>
                   <item type="float" >0.20343</item>
                  </vector>
                 </coordinates>
                </fractional>
                <uncertain_value type="UncertainValue" >
                 <value type="float" >1</value>
                 <uncertainty type="Uncertainty" >
                  <precision type="int" >0</precision>
                  <uncertainty type="int" >0</uncertainty>
                 </uncertainty>
                </uncertain_value>
                <uncertainty type="Handle" >
                 <serial_number type="int" >153</serial_number>
                 <value type="Container" >
                  <count type="int" >3</count>
                  <item type="Uncertainty" >
                   <precision type="int" >5</precision>
                   <uncertainty type="int" >14</uncertainty>
                  </item>
                  <item type="Uncertainty" >
                   <precision type="int" >5</precision>
                   <uncertainty type="int" >18</uncertainty>
                  </item>
                  <item type="Uncertainty" >
                   <precision type="int" >5</precision>
                   <uncertainty type="int" >10</uncertainty>
                  </item>
                 </value>
                </uncertainty>
                <adps type="Handle" >
                 <serial_number type="int" >154</serial_number>
                 <value type="AtomicDisplacementParameters" >
                  <uvalues type="Container" >
                   <count type="int" >6</count>
                   <item type="UncertainValue" >
                    <value type="float" >0.0224</value>
                    <uncertainty type="Uncertainty" >
                     <precision type="int" >4</precision>
                     <uncertainty type="int" >8</uncertainty>
                    </uncertainty>
                   </item>
                   <item type="UncertainValue" >
                    <value type="float" >0.019300000000000001</value>
                    <uncertainty type="Uncertainty" >
                     <precision type="int" >4</precision>
                     <uncertainty type="int" >8</uncertainty>
                    </uncertainty>
                   </item>
                   <item type="UncertainValue" >
                    <value type="float" >0.016500000000000001</value>
                    <uncertainty type="Uncertainty" >
                     <precision type="int" >4</precision>
                     <uncertainty type="int" >8</uncertainty>
                    </uncertainty>
                   </item>
                   <item type="UncertainValue" >
                    <value type="float" >-0.0012999999999999999</value>
                    <uncertainty type="Uncertainty" >
                     <precision type="int" >4</precision>
                     <uncertainty type="int" >7</uncertainty>
                    </uncertainty>
                   </item>
                   <item type="UncertainValue" >
                    <value type="float" >0.0022000000000000001</value>
                    <uncertainty type="Uncertainty" >
                     <precision type="int" >4</precision>
                     <uncertainty type="int" >7</uncertainty>
                    </uncertainty>
                   </item>
                   <item type="UncertainValue" >
                    <value type="float" >0.00020000000000000001</value>
                    <uncertainty type="Uncertainty" >
                     <precision type="int" >4</precision>
                     <uncertainty type="int" >7</uncertainty>
                    </uncertainty>
                   </item>
                  </uvalues>
                  <type type="AtomicDisplacementParameters::Type" >
                   <enumerator type="int" >0</enumerator>
                  </type>
                  <u_equivalent type="float" >0.020158140347535609</u_equivalent>
                 </value>
                </adps>
               </value>
              </site>
              <annotations type="Annotations" >
               <annotations type="Container" >
                <count type="int" >1</count>
                <item type="Handle" >
                 <serial_number type="int" >155</serial_number>
                 <value type="FileOrdering" >
                  <value type="Handle" >
                   <serial_number type="int" >156</serial_number>
                   <value type="FileOrdering" >
                    <file_order type="int" >24</file_order>
                   </value>
                  </value>
                 </value>
                </item>
               </annotations>
              </annotations>
             </value>
            </item>
            <item type="Handle" >
             <serial_number type="int" >157</serial_number>
             <value type="Atom3d" >
              <element type="Element" >
               <code type="char" >2</code>
              </element>
              <formal_charge type="int" >0</formal_charge>
              <radius type="float" >0.23000000000000001</radius>
              <label type="string" >H9</label>
              <site type="Handle" >
               <serial_number type="int" >158</serial_number>
               <value type="Site" >
                <orthogonal type="Point" >
                 <coordinates type="Vector" >
                  <vector type="Container" >
                   <count type="int" >3</count>
                   <item type="float" >7.2609050365749965</item>
                   <item type="float" >1.8843773500000003</item>
                   <item type="float" >4.5566152371094617</item>
                  </vector>
                 </coordinates>
                </orthogonal>
                <fractional type="Point" >
                 <coordinates type="Vector" >
                  <vector type="Container" >
                   <count type="int" >3</count>
                   <item type="float" >0.62409999999999999</item>
                   <item type="float" >0.1865</item>
                   <item type="float" >0.2545</item>
                  </vector>
                 </coordinates>
                </fractional>
                <uncertain_value type="UncertainValue" >
                 <value type="float" >1</value>
                 <uncertainty type="Uncertainty" >
                  <precision type="int" >0</precision>
                  <uncertainty type="int" >0</uncertainty>
                 </uncertainty>
                </uncertain_value>
                <uncertainty type="Handle" >
                 <serial_number type="int" >159</serial_number>
                 <value type="Container" >
                  <count type="int" >3</count>
                  <item type="Uncertainty" >
                   <precision type="int" >4</precision>
                   <uncertainty type="int" >0</uncertainty>
                  </item>
                  <item type="Uncertainty" >
                   <precision type="int" >4</precision>
                   <uncertainty type="int" >0</uncertainty>
                  </item>
                  <item type="Uncertainty" >
                   <precision type="int" >4</precision>
                   <uncertainty type="int" >0</uncertainty>
                  </item>
                 </value>
                </uncertainty>
                <adps type="Handle" >
                 <serial_number type="int" >160</serial_number>
                 <value type="AtomicDisplacementParameters" >
                  <uvalues type="Container" >
                   <count type="int" >6</count>
                   <item type="UncertainValue" >
                    <value type="float" >0.024000000000000004</value>
                    <uncertainty type="Uncertainty" >
                     <precision type="int" >1000000</precision>
                     <uncertainty type="int" >0</uncertainty>
                    </uncertainty>
                   </item>
                   <item type="UncertainValue" >
                    <value type="float" >0.024000000000000004</value>
                    <uncertainty type="Uncertainty" >
                     <precision type="int" >1000000</precision>
                     <uncertainty type="int" >0</uncertainty>
                    </uncertainty>
                   </item>
                   <item type="UncertainValue" >
                    <value type="float" >0.024</value>
                    <uncertainty type="Uncertainty" >
                     <precision type="int" >1000000</precision>
                     <uncertainty type="int" >0</uncertainty>
                    </uncertainty>
                   </item>
                   <item type="UncertainValue" >
                    <value type="float" >-1.990555680050283e-18</value>
                    <uncertainty type="Uncertainty" >
                     <precision type="int" >1000000</precision>
                     <uncertainty type="int" >0</uncertainty>
                    </uncertainty>
                   </item>
                   <item type="UncertainValue" >
                    <value type="float" >0.0070669761745296459</value>
                    <uncertainty type="Uncertainty" >
                     <precision type="int" >1000000</precision>
                     <uncertainty type="int" >0</uncertainty>
                    </uncertainty>
                   </item>
                   <item type="UncertainValue" >
                    <value type="float" >-1.9905556800502823e-18</value>
                    <uncertainty type="Uncertainty" >
                     <precision type="int" >1000000</precision>
                     <uncertainty type="int" >0</uncertainty>
                    </uncertainty>
                   </item>
                  </uvalues>
                  <type type="AtomicDisplacementParameters::Type" >
                   <enumerator type="int" >1</enumerator>
                  </type>
                  <u_equivalent type="float" >0.024</u_equivalent>
                 </value>
                </adps>
               </value>
              </site>
              <annotations type="Annotations" >
               <annotations type="Container" >
                <count type="int" >1</count>
                <item type="Handle" >
                 <serial_number type="int" >161</serial_number>
                 <value type="FileOrdering" >
                  <value type="Handle" >
                   <serial_number type="int" >162</serial_number>
                   <value type="FileOrdering" >
                    <file_order type="int" >25</file_order>
                   </value>
                  </value>
                 </value>
                </item>
               </annotations>
              </annotations>
             </value>
            </item>
            <item type="Handle" >
             <serial_number type="int" >163</serial_number>
             <value type="Atom3d" >
              <element type="Element" >
               <code type="char" >1</code>
              </element>
              <formal_charge type="int" >0</formal_charge>
              <radius type="float" >0.68000000000000005</radius>
              <label type="string" >C10</label>
              <site type="Handle" >
               <serial_number type="int" >164</serial_number>
               <value type="Site" >
                <orthogonal type="Point" >
                 <coordinates type="Vector" >
                  <vector type="Container" >
                   <count type="int" >3</count>
                   <item type="float" >7.9992837955087044</item>
                   <item type="float" >1.8628560430000001</item>
                   <item type="float" >2.6630685672599661</item>
                  </vector>
                 </coordinates>
                </orthogonal>
                <fractional type="Point" >
                 <coordinates type="Vector" >
                  <vector type="Container" >
                   <count type="int" >3</count>
                   <item type="float" >0.63526000000000005</item>
                   <item type="float" >0.18437000000000001</item>
                   <item type="float" >0.14874000000000001</item>
                  </vector>
                 </coordinates>
                </fractional>
                <uncertain_value type="UncertainValue" >
                 <value type="float" >1</value>
                 <uncertainty type="Uncertainty" >
                  <precision type="int" >0</precision>
                  <uncertainty type="int" >0</uncertainty>
                 </uncertainty>
                </uncertain_value>
                <uncertainty type="Handle" >
                 <serial_number type="int" >165</serial_number>
                 <value type="Container" >
                  <count type="int" >3</count>
                  <item type="Uncertainty" >
                   <precision type="int" >5</precision>
                   <uncertainty type="int" >14</uncertainty>
                  </item>
                  <item type="Uncertainty" >
                   <precision type="int" >5</precision>
                   <uncertainty type="int" >17</uncertainty>
                  </item>
                  <item type="Uncertainty" >
                   <precision type="int" >5</precision>
                   <uncertainty type="int" >10</uncertainty>
                  </item>
                 </value>
                </uncertainty>
                <adps type="Handle" >
                 <serial_number type="int" >166</serial_number>
                 <value type="AtomicDisplacementParameters" >
                  <uvalues type="Container" >
                   <count type="int" >6</count>
                   <item type="UncertainValue" >
                    <value type="float" >0.0201</value>
                    <uncertainty type="Uncertainty" >
                     <precision type="int" >4</precision>
                     <uncertainty type="int" >8</uncertainty>
                    </uncertainty>
                   </item>
                   <item type="UncertainValue" >
                    <value type="float" >0.0177</value>
                    <uncertainty type="Uncertainty" >
                     <precision type="int" >4</precision>
                     <uncertainty type="int" >8</uncertainty>
                    </uncertainty>
                   </item>
                   <item type="UncertainValue" >
                    <value type="float" >0.023</value>
                    <uncertainty type="Uncertainty" >
                     <precision type="int" >4</precision>
                     <uncertainty type="int" >9</uncertainty>
                    </uncertainty>
                   </item>
                   <item type="UncertainValue" >
                    <value type="float" >-0.00069999999999999999</value>
                    <uncertainty type="Uncertainty" >
                     <precision type="int" >4</precision>
                     <uncertainty type="int" >7</uncertainty>
                    </uncertainty>
                   </item>
                   <item type="UncertainValue" >
                    <value type="float" >0.0063</value>
                    <uncertainty type="Uncertainty" >
                     <precision type="int" >4</precision>
                     <uncertainty type="int" >7</uncertainty>
                    </uncertainty>
                   </item>
                   <item type="UncertainValue" >
                    <value type="float" >0.00080000000000000004</value>
                    <uncertainty type="Uncertainty" >
                     <precision type="int" >4</precision>
                     <uncertainty type="int" >7</uncertainty>
                    </uncertainty>
                   </item>
                  </uvalues>
                  <type type="AtomicDisplacementParameters::Type" >
                   <enumerator type="int" >0</enumerator>
                  </type>
                  <u_equivalent type="float" >0.020276458471200708</u_equivalent>
                 </value>
                </adps>
               </value>
              </site>
              <annotations type="Annotations" >
               <annotations type="Container" >
                <count type="int" >1</count>
                <item type="Handle" >
                 <serial_number type="int" >167</serial_number>
                 <value type="FileOrdering" >
                  <value type="Handle" >
                   <serial_number type="int" >168</serial_number>
                   <value type="FileOrdering" >
                    <file_order type="int" >26</file_order>
                   </value>
                  </value>
                 </value>
                </item>
               </annotations>
              </annotations>
             </value>
            </item>
            <item type="Handle" >
             <serial_number type="int" >169</serial_number>
             <value type="Atom3d" >
              <element type="Element" >
               <code type="char" >2</code>
              </element>
              <formal_charge type="int" >0</formal_charge>
              <radius type="float" >0.23000000000000001</radius>
              <label type="string" >H10</label>
              <site type="Handle" >
               <serial_number type="int" >170</serial_number>
               <value type="Site" >
                <orthogonal type="Point" >
                 <coordinates type="Vector" >
                  <vector type="Container" >
                   <count type="int" >3</count>
                   <item type="float" >8.908862280220303</item>
                   <item type="float" >1.96419816</item>
                   <item type="float" >2.9165918354622056</item>
                  </vector>
                 </coordinates>
                </orthogonal>
                <fractional type="Point" >
                 <coordinates type="Vector" >
                  <vector type="Container" >
                   <count type="int" >3</count>
                   <item type="float" >0.70640000000000003</item>
                   <item type="float" >0.19439999999999999</item>
                   <item type="float" >0.16289999999999999</item>
                  </vector>
                 </coordinates>
                </fractional>
                <uncertain_value type="UncertainValue" >
                 <value type="float" >1</value>
                 <uncertainty type="Uncertainty" >
                  <precision type="int" >0</precision>
                  <uncertainty type="int" >0</uncertainty>
                 </uncertainty>
                </uncertain_value>
                <uncertainty type="Handle" >
                 <serial_number type="int" >171</serial_number>
                 <value type="Container" >
                  <count type="int" >3</count>
                  <item type="Uncertainty" >
                   <precision type="int" >4</precision>
                   <uncertainty type="int" >0</uncertainty>
                  </item>
                  <item type="Uncertainty" >
                   <precision type="int" >4</precision>
                   <uncertainty type="int" >0</uncertainty>
                  </item>
                  <item type="Uncertainty" >
                   <precision type="int" >4</precision>
                   <uncertainty type="int" >0</uncertainty>
                  </item>
                 </value>
                </uncertainty>
                <adps type="Handle" >
                 <serial_number type="int" >172</serial_number>
                 <value type="AtomicDisplacementParameters" >
                  <uvalues type="Container" >
                   <count type="int" >6</count>
                   <item type="UncertainValue" >
                    <value type="float" >0.024000000000000004</value>
                    <uncertainty type="Uncertainty" >
                     <precision type="int" >1000000</precision>
                     <uncertainty type="int" >0</uncertainty>
                    </uncertainty>
                   </item>
                   <item type="UncertainValue" >
                    <value type="float" >0.024000000000000004</value>
                    <uncertainty type="Uncertainty" >
                     <precision type="int" >1000000</precision>
                     <uncertainty type="int" >0</uncertainty>
                    </uncertainty>
                   </item>
                   <item type="UncertainValue" >
                    <value type="float" >0.024</value>
                    <uncertainty type="Uncertainty" >
                     <precision type="int" >1000000</precision>
                     <uncertainty type="int" >0</uncertainty>
                    </uncertainty>
                   </item>
                   <item type="UncertainValue" >
                    <value type="float" >-1.990555680050283e-18</value>
                    <uncertainty type="Uncertainty" >
                     <precision type="int" >1000000</precision>
                     <uncertainty type="int" >0</uncertainty>
                    </uncertainty>
                   </item>
                   <item type="UncertainValue" >
                    <value type="float" >0.0070669761745296459</value>
                    <uncertainty type="Uncertainty" >
                     <precision type="int" >1000000</precision>
                     <uncertainty type="int" >0</uncertainty>
                    </uncertainty>
                   </item>
                   <item type="UncertainValue" >
                    <value type="float" >-1.9905556800502823e-18</value>
                    <uncertainty type="Uncertainty" >
                     <precision type="int" >1000000</precision>
                     <uncertainty type="int" >0</uncertainty>
                    </uncertainty>
                   </item>
                  </uvalues>
                  <type type="AtomicDisplacementParameters::Type" >
                   <enumerator type="int" >1</enumerator>
                  </type>
                  <u_equivalent type="float" >0.024</u_equivalent>
                 </value>
                </adps>
               </value>
              </site>
              <annotations type="Annotations" >
               <annotations type="Container" >
                <count type="int" >1</count>
                <item type="Handle" >
                 <serial_number type="int" >173</serial_number>
                 <value type="FileOrdering" >
                  <value type="Handle" >
                   <serial_number type="int" >174</serial_number>
                   <value type="FileOrdering" >
                    <file_order type="int" >27</file_order>
                   </value>
                  </value>
                 </value>
                </item>
               </annotations>
              </annotations>
             </value>
            </item>
            <item type="Handle" >
             <serial_number type="int" >175</serial_number>
             <value type="Atom3d" >
              <element type="Element" >
               <code type="char" >1</code>
              </element>
              <formal_charge type="int" >0</formal_charge>
              <radius type="float" >0.68000000000000005</radius>
              <label type="string" >C11</label>
              <site type="Handle" >
               <serial_number type="int" >176</serial_number>
               <value type="Site" >
                <orthogonal type="Point" >
                 <coordinates type="Vector" >
                  <vector type="Container" >
                   <count type="int" >3</count>
                   <item type="float" >7.664865627022234</item>
                   <item type="float" >1.7760635419999997</item>
                   <item type="float" >1.3102283027570545</item>
                  </vector>
                 </coordinates>
                </orthogonal>
                <fractional type="Point" >
                 <coordinates type="Vector" >
                  <vector type="Container" >
                   <count type="int" >3</count>
                   <item type="float" >0.58115000000000006</item>
                   <item type="float" >0.17577999999999999</item>
                   <item type="float" >0.073179999999999995</item>
                  </vector>
                 </coordinates>
                </fractional>
                <uncertain_value type="UncertainValue" >
                 <value type="float" >1</value>
                 <uncertainty type="Uncertainty" >
                  <precision type="int" >0</precision>
                  <uncertainty type="int" >0</uncertainty>
                 </uncertainty>
                </uncertain_value>
                <uncertainty type="Handle" >
                 <serial_number type="int" >177</serial_number>
                 <value type="Container" >
                  <count type="int" >3</count>
                  <item type="Uncertainty" >
                   <precision type="int" >5</precision>
                   <uncertainty type="int" >13</uncertainty>
                  </item>
                  <item type="Uncertainty" >
                   <precision type="int" >5</precision>
                   <uncertainty type="int" >16</uncertainty>
                  </item>
                  <item type="Uncertainty" >
                   <precision type="int" >5</precision>
                   <uncertainty type="int" >10</uncertainty>
                  </item>
                 </value>
                </uncertainty>
                <adps type="Handle" >
                 <serial_number type="int" >178</serial_number>
                 <value type="AtomicDisplacementParameters" >
                  <uvalues type="Container" >
                   <count type="int" >6</count>
                   <item type="UncertainValue" >
                    <value type="float" >0.0183</value>
                    <uncertainty type="Uncertainty" >
                     <precision type="int" >4</precision>
                     <uncertainty type="int" >8</uncertainty>
                    </uncertainty>
                   </item>
                   <item type="UncertainValue" >
                    <value type="float" >0.0126</value>
                    <uncertainty type="Uncertainty" >
                     <precision type="int" >4</precision>
                     <uncertainty type="int" >8</uncertainty>
                    </uncertainty>
                   </item>
                   <item type="UncertainValue" >
                    <value type="float" >0.022599999999999999</value>
                    <uncertainty type="Uncertainty" >
                     <precision type="int" >4</precision>
                     <uncertainty type="int" >9</uncertainty>
                    </uncertainty>
                   </item>
                   <item type="UncertainValue" >
                    <value type="float" >0.001</value>
                    <uncertainty type="Uncertainty" >
                     <precision type="int" >4</precision>
                     <uncertainty type="int" >6</uncertainty>
                    </uncertainty>
                   </item>
                   <item type="UncertainValue" >
                    <value type="float" >0.0061000000000000004</value>
                    <uncertainty type="Uncertainty" >
                     <precision type="int" >4</precision>
                     <uncertainty type="int" >7</uncertainty>
                    </uncertainty>
                   </item>
                   <item type="UncertainValue" >
                    <value type="float" >0.0016000000000000001</value>
                    <uncertainty type="Uncertainty" >
                     <precision type="int" >4</precision>
                     <uncertainty type="int" >6</uncertainty>
                    </uncertainty>
                   </item>
                  </uvalues>
                  <type type="AtomicDisplacementParameters::Type" >
                   <enumerator type="int" >0</enumerator>
                  </type>
                  <u_equivalent type="float" >0.017816493235528499</u_equivalent>
                 </value>
                </adps>
               </value>
              </site>
              <annotations type="Annotations" >
               <annotations type="Container" >
                <count type="int" >1</count>
                <item type="Handle" >
                 <serial_number type="int" >179</serial_number>
                 <value type="FileOrdering" >
                  <value type="Handle" >
                   <serial_number type="int" >180</serial_number>
                   <value type="FileOrdering" >
                    <file_order type="int" >28</file_order>
                   </value>
                  </value>
                 </value>
                </item>
               </annotations>
              </annotations>
             </value>
            </item>
            <item type="Handle" >
             <serial_number type="int" >181</serial_number>
             <value type="Atom3d" >
              <element type="Element" >
               <code type="char" >1</code>
              </element>
              <formal_charge type="int" >0</formal_charge>
              <radius type="float" >0.68000000000000005</radius>
              <label type="string" >C12</label>
              <site type="Handle" >
               <serial_number type="int" >182</serial_number>
               <value type="Site" >
                <orthogonal type="Point" >
                 <coordinates type="Vector" >
                  <vector type="Container" >
                   <count type="int" >3</count>
                   <item type="float" >8.6631871672776075</item>
                   <item type="float" >1.8106188799999998</item>
                   <item type="float" >0.26999511896114214</item>
                  </vector>
                 </coordinates>
                </orthogonal>
                <fractional type="Point" >
                 <coordinates type="Vector" >
                  <vector type="Container" >
                   <count type="int" >3</count>
                   <item type="float" >0.62997000000000003</item>
                   <item type="float" >0.1792</item>
                   <item type="float" >0.01508</item>
                  </vector>
                 </coordinates>
                </fractional>
                <uncertain_value type="UncertainValue" >
                 <value type="float" >1</value>
                 <uncertainty type="Uncertainty" >
                  <precision type="int" >0</precision>
                  <uncertainty type="int" >0</uncertainty>
                 </uncertainty>
                </uncertain_value>
                <uncertainty type="Handle" >
                 <serial_number type="int" >183</serial_number>
                 <value type="Container" >
                  <count type="int" >3</count>
                  <item type="Uncertainty" >
                   <precision type="int" >5</precision>
                   <uncertainty type="int" >14</uncertainty>
                  </item>
                  <item type="Uncertainty" >
                   <precision type="int" >5</precision>
                   <uncertainty type="int" >17</uncertainty>
                  </item>
                  <item type="Uncertainty" >
                   <precision type="int" >5</precision>
                   <uncertainty type="int" >10</uncertainty>
                  </item>
                 </value>
                </uncertainty>
                <adps type="Handle" >
                 <serial_number type="int" >184</serial_number>
                 <value type="AtomicDisplacementParameters" >
                  <uvalues type="Container" >
                   <count type="int" >6</count>
                   <item type="UncertainValue" >
                    <value type="float" >0.0206</value>
                    <uncertainty type="Uncertainty" >
                     <precision type="int" >4</precision>
                     <uncertainty type="int" >8</uncertainty>
                    </uncertainty>
                   </item>
                   <item type="UncertainValue" >
                    <value type="float" >0.016400000000000001</value>
                    <uncertainty type="Uncertainty" >
                     <precision type="int" >4</precision>
                     <uncertainty type="int" >8</uncertainty>
                    </uncertainty>
                   </item>
                   <item type="UncertainValue" >
                    <value type="float" >0.023400000000000001</value>
                    <uncertainty type="Uncertainty" >
                     <precision type="int" >4</precision>
                     <uncertainty type="int" >9</uncertainty>
                    </uncertainty>
                   </item>
                   <item type="UncertainValue" >
                    <value type="float" >0</value>
                    <uncertainty type="Uncertainty" >
                     <precision type="int" >4</precision>
                     <uncertainty type="int" >7</uncertainty>
                    </uncertainty>
                   </item>
                   <item type="UncertainValue" >
                    <value type="float" >0.0071000000000000004</value>
                    <uncertainty type="Uncertainty" >
                     <precision type="int" >4</precision>
                     <uncertainty type="int" >7</uncertainty>
                    </uncertainty>
                   </item>
                   <item type="UncertainValue" >
                    <value type="float" >-0.00029999999999999997</value>
                    <uncertainty type="Uncertainty" >
                     <precision type="int" >4</precision>
                     <uncertainty type="int" >7</uncertainty>
                    </uncertainty>
                   </item>
                  </uvalues>
                  <type type="AtomicDisplacementParameters::Type" >
                   <enumerator type="int" >0</enumerator>
                  </type>
                  <u_equivalent type="float" >0.019999652989924756</u_equivalent>
                 </value>
                </adps>
               </value>
              </site>
              <annotations type="Annotations" >
               <annotations type="Container" >
                <count type="int" >1</count>
                <item type="Handle" >
                 <serial_number type="int" >185</serial_number>
                 <value type="FileOrdering" >
                  <value type="Handle" >
                   <serial_number type="int" >186</serial_number>
                   <value type="FileOrdering" >
                    <file_order type="int" >29</file_order>
                   </value>
                  </value>
                 </value>
                </item>
               </annotations>
              </annotations>
             </value>
            </item>
            <item type="Handle" >
             <serial_number type="int" >187</serial_number>
             <value type="Atom3d" >
              <element type="Element" >
               <code type="char" >2</code>
              </element>
              <formal_charge type="int" >0</formal_charge>
              <radius type="float" >0.23000000000000001</radius>
              <label type="string" >H12</label>
              <site type="Handle" >
               <serial_number type="int" >188</serial_number>
               <value type="Site" >
                <orthogonal type="Point" >
                 <coordinates type="Vector" >
                  <vector type="Container" >
                   <count type="int" >3</count>
                   <item type="float" >9.5786491374724179</item>
                   <item type="float" >1.8904396899999998</item>
                   <item type="float" >0.50847887125307945</item>
                  </vector>
                 </coordinates>
                </orthogonal>
                <fractional type="Point" >
                 <coordinates type="Vector" >
                  <vector type="Container" >
                   <count type="int" >3</count>
                   <item type="float" >0.70120000000000005</item>
                   <item type="float" >0.18709999999999999</item>
                   <item type="float" >0.028400000000000002</item>
                  </vector>
                 </coordinates>
                </fractional>
                <uncertain_value type="UncertainValue" >
                 <value type="float" >1</value>
                 <uncertainty type="Uncertainty" >
                  <precision type="int" >0</precision>
                  <uncertainty type="int" >0</uncertainty>
                 </uncertainty>
                </uncertain_value>
                <uncertainty type="Handle" >
                 <serial_number type="int" >189</serial_number>
                 <value type="Container" >
                  <count type="int" >3</count>
                  <item type="Uncertainty" >
                   <precision type="int" >4</precision>
                   <uncertainty type="int" >0</uncertainty>
                  </item>
                  <item type="Uncertainty" >
                   <precision type="int" >4</precision>
                   <uncertainty type="int" >0</uncertainty>
                  </item>
                  <item type="Uncertainty" >
                   <precision type="int" >4</precision>
                   <uncertainty type="int" >0</uncertainty>
                  </item>
                 </value>
                </uncertainty>
                <adps type="Handle" >
                 <serial_number type="int" >190</serial_number>
                 <value type="AtomicDisplacementParameters" >
                  <uvalues type="Container" >
                   <count type="int" >6</count>
                   <item type="UncertainValue" >
                    <value type="float" >0.024000000000000004</value>
                    <uncertainty type="Uncertainty" >
                     <precision type="int" >1000000</precision>
                     <uncertainty type="int" >0</uncertainty>
                    </uncertainty>
                   </item>
                   <item type="UncertainValue" >
                    <value type="float" >0.024000000000000004</value>
                    <uncertainty type="Uncertainty" >
                     <precision type="int" >1000000</precision>
                     <uncertainty type="int" >0</uncertainty>
                    </uncertainty>
                   </item>
                   <item type="UncertainValue" >
                    <value type="float" >0.024</value>
                    <uncertainty type="Uncertainty" >
                     <precision type="int" >1000000</precision>
                     <uncertainty type="int" >0</uncertainty>
                    </uncertainty>
                   </item>
                   <item type="UncertainValue" >
                    <value type="float" >-1.990555680050283e-18</value>
                    <uncertainty type="Uncertainty" >
                     <precision type="int" >1000000</precision>
                     <uncertainty type="int" >0</uncertainty>
                    </uncertainty>
                   </item>
                   <item type="UncertainValue" >
                    <value type="float" >0.0070669761745296459</value>
                    <uncertainty type="Uncertainty" >
                     <precision type="int" >1000000</precision>
                     <uncertainty type="int" >0</uncertainty>
                    </uncertainty>
                   </item>
                   <item type="UncertainValue" >
                    <value type="float" >-1.9905556800502823e-18</value>
                    <uncertainty type="Uncertainty" >
                     <precision type="int" >1000000</precision>
                     <uncertainty type="int" >0</uncertainty>
                    </uncertainty>
                   </item>
                  </uvalues>
                  <type type="AtomicDisplacementParameters::Type" >
                   <enumerator type="int" >1</enumerator>
                  </type>
                  <u_equivalent type="float" >0.024</u_equivalent>
                 </value>
                </adps>
               </value>
              </site>
              <annotations type="Annotations" >
               <annotations type="Container" >
                <count type="int" >1</count>
                <item type="Handle" >
                 <serial_number type="int" >191</serial_number>
                 <value type="FileOrdering" >
                  <value type="Handle" >
                   <serial_number type="int" >192</serial_number>
                   <value type="FileOrdering" >
                    <file_order type="int" >30</file_order>
                   </value>
                  </value>
                 </value>
                </item>
               </annotations>
              </annotations>
             </value>
            </item>
            <item type="Handle" >
             <serial_number type="int" >193</serial_number>
             <value type="Atom3d" >
              <element type="Element" >
               <code type="char" >1</code>
              </element>
              <formal_charge type="int" >0</formal_charge>
              <radius type="float" >0.68000000000000005</radius>
              <label type="string" >C13</label>
              <site type="Handle" >
               <serial_number type="int" >194</serial_number>
               <value type="Site" >
                <orthogonal type="Point" >
                 <coordinates type="Vector" >
                  <vector type="Container" >
                   <count type="int" >3</count>
                   <item type="float" >8.3233418244337898</item>
                   <item type="float" >1.731303265</item>
                   <item type="float" >-1.0350409699697367</item>
                  </vector>
                 </coordinates>
                </orthogonal>
                <fractional type="Point" >
                 <coordinates type="Vector" >
                  <vector type="Container" >
                   <count type="int" >3</count>
                   <item type="float" >0.57652999999999999</item>
                   <item type="float" >0.17135</item>
                   <item type="float" >-0.05781</item>
                  </vector>
                 </coordinates>
                </fractional>
                <uncertain_value type="UncertainValue" >
                 <value type="float" >1</value>
                 <uncertainty type="Uncertainty" >
                  <precision type="int" >0</precision>
                  <uncertainty type="int" >0</uncertainty>
                 </uncertainty>
                </uncertain_value>
                <uncertainty type="Handle" >
                 <serial_number type="int" >195</serial_number>
                 <value type="Container" >
                  <count type="int" >3</count>
                  <item type="Uncertainty" >
                   <precision type="int" >5</precision>
                   <uncertainty type="int" >14</uncertainty>
                  </item>
                  <item type="Uncertainty" >
                   <precision type="int" >5</precision>
                   <uncertainty type="int" >17</uncertainty>
                  </item>
                  <item type="Uncertainty" >
                   <precision type="int" >5</precision>
                   <uncertainty type="int" >10</uncertainty>
                  </item>
                 </value>
                </uncertainty>
                <adps type="Handle" >
                 <serial_number type="int" >196</serial_number>
                 <value type="AtomicDisplacementParameters" >
                  <uvalues type="Container" >
                   <count type="int" >6</count>
                   <item type="UncertainValue" >
                    <value type="float" >0.025700000000000001</value>
                    <uncertainty type="Uncertainty" >
                     <precision type="int" >4</precision>
                     <uncertainty type="int" >9</uncertainty>
                    </uncertainty>
                   </item>
                   <item type="UncertainValue" >
                    <value type="float" >0.015599999999999999</value>
                    <uncertainty type="Uncertainty" >
                     <precision type="int" >4</precision>
                     <uncertainty type="int" >8</uncertainty>
                    </uncertainty>
                   </item>
                   <item type="UncertainValue" >
                    <value type="float" >0.023</value>
                    <uncertainty type="Uncertainty" >
                     <precision type="int" >4</precision>
                     <uncertainty type="int" >9</uncertainty>
                    </uncertainty>
                   </item>
                   <item type="UncertainValue" >
                    <value type="float" >0.00050000000000000001</value>
                    <uncertainty type="Uncertainty" >
                     <precision type="int" >4</precision>
                     <uncertainty type="int" >7</uncertainty>
                    </uncertainty>
                   </item>
                   <item type="UncertainValue" >
                    <value type="float" >0.011299999999999999</value>
                    <uncertainty type="Uncertainty" >
                     <precision type="int" >4</precision>
                     <uncertainty type="int" >7</uncertainty>
                    </uncertainty>
                   </item>
                   <item type="UncertainValue" >
                    <value type="float" >0.00080000000000000004</value>
                    <uncertainty type="Uncertainty" >
                     <precision type="int" >4</precision>
                     <uncertainty type="int" >7</uncertainty>
                    </uncertainty>
                   </item>
                  </uvalues>
                  <type type="AtomicDisplacementParameters::Type" >
                   <enumerator type="int" >0</enumerator>
                  </type>
                  <u_equivalent type="float" >0.020545633074753527</u_equivalent>
                 </value>
                </adps>
               </value>
              </site>
              <annotations type="Annotations" >
               <annotations type="Container" >
                <count type="int" >1</count>
                <item type="Handle" >
                 <serial_number type="int" >197</serial_number>
                 <value type="FileOrdering" >
                  <value type="Handle" >
                   <serial_number type="int" >198</serial_number>
                   <value type="FileOrdering" >
                    <file_order type="int" >31</file_order>
                   </value>
                  </value>
                 </value>
                </item>
               </annotations>
              </annotations>
             </value>
            </item>
            <item type="Handle" >
             <serial_number type="int" >199</serial_number>
             <value type="Atom3d" >
              <element type="Element" >
               <code type="char" >2</code>
              </element>
              <formal_charge type="int" >0</formal_charge>
              <radius type="float" >0.23000000000000001</radius>
              <label type="string" >H13</label>
              <site type="Handle" >
               <serial_number type="int" >200</serial_number>
               <value type="Site" >
                <orthogonal type="Point" >
                 <coordinates type="Vector" >
                  <vector type="Container" >
                   <count type="int" >3</count>
                   <item type="float" >9.004587041676583</item>
                   <item type="float" >1.7439331399999998</item>
                   <item type="float" >-1.6973167955912651</item>
                  </vector>
                 </coordinates>
                </orthogonal>
                <fractional type="Point" >
                 <coordinates type="Vector" >
                  <vector type="Container" >
                   <count type="int" >3</count>
                   <item type="float" >0.6109</item>
                   <item type="float" >0.1726</item>
                   <item type="float" >-0.094799999999999995</item>
                  </vector>
                 </coordinates>
                </fractional>
                <uncertain_value type="UncertainValue" >
                 <value type="float" >1</value>
                 <uncertainty type="Uncertainty" >
                  <precision type="int" >0</precision>
                  <uncertainty type="int" >0</uncertainty>
                 </uncertainty>
                </uncertain_value>
                <uncertainty type="Handle" >
                 <serial_number type="int" >201</serial_number>
                 <value type="Container" >
                  <count type="int" >3</count>
                  <item type="Uncertainty" >
                   <precision type="int" >4</precision>
                   <uncertainty type="int" >0</uncertainty>
                  </item>
                  <item type="Uncertainty" >
                   <precision type="int" >4</precision>
                   <uncertainty type="int" >0</uncertainty>
                  </item>
                  <item type="Uncertainty" >
                   <precision type="int" >4</precision>
                   <uncertainty type="int" >0</uncertainty>
                  </item>
                 </value>
                </uncertainty>
                <adps type="Handle" >
                 <serial_number type="int" >202</serial_number>
                 <value type="AtomicDisplacementParameters" >
                  <uvalues type="Container" >
                   <count type="int" >6</count>
                   <item type="UncertainValue" >
                    <value type="float" >0.025000000000000005</value>
                    <uncertainty type="Uncertainty" >
                     <precision type="int" >1000000</precision>
                     <uncertainty type="int" >0</uncertainty>
                    </uncertainty>
                   </item>
                   <item type="UncertainValue" >
                    <value type="float" >0.025000000000000001</value>
                    <uncertainty type="Uncertainty" >
                     <precision type="int" >1000000</precision>
                     <uncertainty type="int" >0</uncertainty>
                    </uncertainty>
                   </item>
                   <item type="UncertainValue" >
                    <value type="float" >0.025000000000000001</value>
                    <uncertainty type="Uncertainty" >
                     <precision type="int" >1000000</precision>
                     <uncertainty type="int" >0</uncertainty>
                    </uncertainty>
                   </item>
                   <item type="UncertainValue" >
                    <value type="float" >-2.0734955000523784e-18</value>
                    <uncertainty type="Uncertainty" >
                     <precision type="int" >1000000</precision>
                     <uncertainty type="int" >0</uncertainty>
                    </uncertainty>
                   </item>
                   <item type="UncertainValue" >
                    <value type="float" >0.0073614335151350489</value>
                    <uncertainty type="Uncertainty" >
                     <precision type="int" >1000000</precision>
                     <uncertainty type="int" >0</uncertainty>
                    </uncertainty>
                   </item>
                   <item type="UncertainValue" >
                    <value type="float" >-2.0734955000523777e-18</value>
                    <uncertainty type="Uncertainty" >
                     <precision type="int" >1000000</precision>
                     <uncertainty type="int" >0</uncertainty>
                    </uncertainty>
                   </item>
                  </uvalues>
                  <type type="AtomicDisplacementParameters::Type" >
                   <enumerator type="int" >1</enumerator>
                  </type>
                  <u_equivalent type="float" >0.025000000000000001</u_equivalent>
                 </value>
                </adps>
               </value>
              </site>
              <annotations type="Annotations" >
               <annotations type="Container" >
                <count type="int" >1</count>
                <item type="Handle" >
                 <serial_number type="int" >203</serial_number>
                 <value type="FileOrdering" >
                  <value type="Handle" >
                   <serial_number type="int" >204</serial_number>
                   <value type="FileOrdering" >
                    <file_order type="int" >32</file_order>
                   </value>
                  </value>
                 </value>
                </item>
               </annotations>
              </annotations>
             </value>
            </item>
            <item type="Handle" >
             <serial_number type="int" >205</serial_number>
             <value type="Atom3d" >
              <element type="Element" >
               <code type="char" >1</code>
              </element>
              <formal_charge type="int" >0</formal_charge>
              <radius type="float" >0.68000000000000005</radius>
              <label type="string" >C14</label>
              <site type="Handle" >
               <serial_number type="int" >206</serial_number>
               <value type="Site" >
                <orthogonal type="Point" >
                 <coordinates type="Vector" >
                  <vector type="Container" >
                   <count type="int" >3</count>
                   <item type="float" >6.9411814965481407</item>
                   <item type="float" >1.6270310169999997</item>
                   <item type="float" >-1.4391384391310746</item>
                  </vector>
                 </coordinates>
                </orthogonal>
                <fractional type="Point" >
                 <coordinates type="Vector" >
                  <vector type="Container" >
                   <count type="int" >3</count>
                   <item type="float" >0.46800999999999998</item>
                   <item type="float" >0.16103000000000001</item>
                   <item type="float" >-0.080379999999999993</item>
                  </vector>
                 </coordinates>
                </fractional>
                <uncertain_value type="UncertainValue" >
                 <value type="float" >1</value>
                 <uncertainty type="Uncertainty" >
                  <precision type="int" >0</precision>
                  <uncertainty type="int" >0</uncertainty>
                 </uncertainty>
                </uncertain_value>
                <uncertainty type="Handle" >
                 <serial_number type="int" >207</serial_number>
                 <value type="Container" >
                  <count type="int" >3</count>
                  <item type="Uncertainty" >
                   <precision type="int" >5</precision>
                   <uncertainty type="int" >14</uncertainty>
                  </item>
                  <item type="Uncertainty" >
                   <precision type="int" >5</precision>
                   <uncertainty type="int" >17</uncertainty>
                  </item>
                  <item type="Uncertainty" >
                   <precision type="int" >5</precision>
                   <uncertainty type="int" >10</uncertainty>
                  </item>
                 </value>
                </uncertainty>
                <adps type="Handle" >
                 <serial_number type="int" >208</serial_number>
                 <value type="AtomicDisplacementParameters" >
                  <uvalues type="Container" >
                   <count type="int" >6</count>
                   <item type="UncertainValue" >
                    <value type="float" >0.0263</value>
                    <uncertainty type="Uncertainty" >
                     <precision type="int" >4</precision>
                     <uncertainty type="int" >9</uncertainty>
                    </uncertainty>
                   </item>
                   <item type="UncertainValue" >
                    <value type="float" >0.013100000000000001</value>
                    <uncertainty type="Uncertainty" >
                     <precision type="int" >4</precision>
                     <uncertainty type="int" >8</uncertainty>
                    </uncertainty>
                   </item>
                   <item type="UncertainValue" >
                    <value type="float" >0.017899999999999999</value>
                    <uncertainty type="Uncertainty" >
                     <precision type="int" >4</precision>
                     <uncertainty type="int" >9</uncertainty>
                    </uncertainty>
                   </item>
                   <item type="UncertainValue" >
                    <value type="float" >0.0018</value>
                    <uncertainty type="Uncertainty" >
                     <precision type="int" >4</precision>
                     <uncertainty type="int" >7</uncertainty>
                    </uncertainty>
                   </item>
                   <item type="UncertainValue" >
                    <value type="float" >0.0070000000000000001</value>
                    <uncertainty type="Uncertainty" >
                     <precision type="int" >4</precision>
                     <uncertainty type="int" >7</uncertainty>
                    </uncertainty>
                   </item>
                   <item type="UncertainValue" >
                    <value type="float" >0.00050000000000000001</value>
                    <uncertainty type="Uncertainty" >
                     <precision type="int" >4</precision>
                     <uncertainty type="int" >6</uncertainty>
                    </uncertainty>
                   </item>
                  </uvalues>
                  <type type="AtomicDisplacementParameters::Type" >
                   <enumerator type="int" >0</enumerator>
                  </type>
                  <u_equivalent type="float" >0.018994142905990028</u_equivalent>
                 </value>
                </adps>
               </value>
              </site>
              <annotations type="Annotations" >
               <annotations type="Container" >
                <count type="int" >1</count>
                <item type="Handle" >
                 <serial_number type="int" >209</serial_number>
                 <value type="FileOrdering" >
                  <value type="Handle" >
                   <serial_number type="int" >210</serial_number>
                   <value type="FileOrdering" >
                    <file_order type="int" >33</file_order>
                   </value>
                  </value>
                 </value>
                </item>
               </annotations>
              </annotations>
             </value>
            </item>
            <item type="Handle" >
             <serial_number type="int" >211</serial_number>
             <value type="Atom3d" >
              <element type="Element" >
               <code type="char" >1</code>
              </element>
              <formal_charge type="int" >0</formal_charge>
              <radius type="float" >0.68000000000000005</radius>
              <label type="string" >C15</label>
              <site type="Handle" >
               <serial_number type="int" >212</serial_number>
               <value type="Site" >
                <orthogonal type="Point" >
                 <coordinates type="Vector" >
                  <vector type="Container" >
                   <count type="int" >3</count>
                   <item type="float" >6.5706498642646958</item>
                   <item type="float" >1.5624670959999998</item>
                   <item type="float" >-2.7860703223835102</item>
                  </vector>
                 </coordinates>
                </orthogonal>
                <fractional type="Point" >
                 <coordinates type="Vector" >
                  <vector type="Container" >
                   <count type="int" >3</count>
                   <item type="float" >0.41143000000000002</item>
                   <item type="float" >0.15464</item>
                   <item type="float" >-0.15561</item>
                  </vector>
                 </coordinates>
                </fractional>
                <uncertain_value type="UncertainValue" >
                 <value type="float" >1</value>
                 <uncertainty type="Uncertainty" >
                  <precision type="int" >0</precision>
                  <uncertainty type="int" >0</uncertainty>
                 </uncertainty>
                </uncertain_value>
                <uncertainty type="Handle" >
                 <serial_number type="int" >213</serial_number>
                 <value type="Container" >
                  <count type="int" >3</count>
                  <item type="Uncertainty" >
                   <precision type="int" >5</precision>
                   <uncertainty type="int" >15</uncertainty>
                  </item>
                  <item type="Uncertainty" >
                   <precision type="int" >5</precision>
                   <uncertainty type="int" >18</uncertainty>
                  </item>
                  <item type="Uncertainty" >
                   <precision type="int" >5</precision>
                   <uncertainty type="int" >10</uncertainty>
                  </item>
                 </value>
                </uncertainty>
                <adps type="Handle" >
                 <serial_number type="int" >214</serial_number>
                 <value type="AtomicDisplacementParameters" >
                  <uvalues type="Container" >
                   <count type="int" >6</count>
                   <item type="UncertainValue" >
                    <value type="float" >0.032199999999999999</value>
                    <uncertainty type="Uncertainty" >
                     <precision type="int" >4</precision>
                     <uncertainty type="int" >10</uncertainty>
                    </uncertainty>
                   </item>
                   <item type="UncertainValue" >
                    <value type="float" >0.017999999999999999</value>
                    <uncertainty type="Uncertainty" >
                     <precision type="int" >4</precision>
                     <uncertainty type="int" >8</uncertainty>
                    </uncertainty>
                   </item>
                   <item type="UncertainValue" >
                    <value type="float" >0.017100000000000001</value>
                    <uncertainty type="Uncertainty" >
                     <precision type="int" >4</precision>
                     <uncertainty type="int" >9</uncertainty>
                    </uncertainty>
                   </item>
                   <item type="UncertainValue" >
                    <value type="float" >0.0018</value>
                    <uncertainty type="Uncertainty" >
                     <precision type="int" >4</precision>
                     <uncertainty type="int" >7</uncertainty>
                    </uncertainty>
                   </item>
                   <item type="UncertainValue" >
                    <value type="float" >0.0080999999999999996</value>
                    <uncertainty type="Uncertainty" >
                     <precision type="int" >4</precision>
                     <uncertainty type="int" >7</uncertainty>
                    </uncertainty>
                   </item>
                   <item type="UncertainValue" >
                    <value type="float" >0.001</value>
                    <uncertainty type="Uncertainty" >
                     <precision type="int" >4</precision>
                     <uncertainty type="int" >7</uncertainty>
                    </uncertainty>
                   </item>
                  </uvalues>
                  <type type="AtomicDisplacementParameters::Type" >
                   <enumerator type="int" >0</enumerator>
                  </type>
                  <u_equivalent type="float" >0.022252432929897707</u_equivalent>
                 </value>
                </adps>
               </value>
              </site>
              <annotations type="Annotations" >
               <annotations type="Container" >
                <count type="int" >1</count>
                <item type="Handle" >
                 <serial_number type="int" >215</serial_number>
                 <value type="FileOrdering" >
                  <value type="Handle" >
                   <serial_number type="int" >216</serial_number>
                   <value type="FileOrdering" >
                    <file_order type="int" >34</file_order>
                   </value>
                  </value>
                 </value>
                </item>
               </annotations>
              </annotations>
             </value>
            </item>
            <item type="Handle" >
             <serial_number type="int" >217</serial_number>
             <value type="Atom3d" >
              <element type="Element" >
               <code type="char" >2</code>
              </element>
              <formal_charge type="int" >0</formal_charge>
              <radius type="float" >0.23000000000000001</radius>
              <label type="string" >H15</label>
              <site type="Handle" >
               <serial_number type="int" >218</serial_number>
               <value type="Site" >
                <orthogonal type="Point" >
                 <coordinates type="Vector" >
                  <vector type="Container" >
                   <count type="int" >3</count>
                   <item type="float" >7.2390961410768311</item>
                   <item type="float" >1.5883330799999997</item>
                   <item type="float" >-3.4608790779302905</item>
                  </vector>
                 </coordinates>
                </orthogonal>
                <fractional type="Point" >
                 <coordinates type="Vector" >
                  <vector type="Container" >
                   <count type="int" >3</count>
                   <item type="float" >0.4446</item>
                   <item type="float" >0.15720000000000001</item>
                   <item type="float" >-0.1933</item>
                  </vector>
                 </coordinates>
                </fractional>
                <uncertain_value type="UncertainValue" >
                 <value type="float" >1</value>
                 <uncertainty type="Uncertainty" >
                  <precision type="int" >0</precision>
                  <uncertainty type="int" >0</uncertainty>
                 </uncertainty>
                </uncertain_value>
                <uncertainty type="Handle" >
                 <serial_number type="int" >219</serial_number>
                 <value type="Container" >
                  <count type="int" >3</count>
                  <item type="Uncertainty" >
                   <precision type="int" >4</precision>
                   <uncertainty type="int" >0</uncertainty>
                  </item>
                  <item type="Uncertainty" >
                   <precision type="int" >4</precision>
                   <uncertainty type="int" >0</uncertainty>
                  </item>
                  <item type="Uncertainty" >
                   <precision type="int" >4</precision>
                   <uncertainty type="int" >0</uncertainty>
                  </item>
                 </value>
                </uncertainty>
                <adps type="Handle" >
                 <serial_number type="int" >220</serial_number>
                 <value type="AtomicDisplacementParameters" >
                  <uvalues type="Container" >
                   <count type="int" >6</count>
                   <item type="UncertainValue" >
                    <value type="float" >0.027000000000000003</value>
                    <uncertainty type="Uncertainty" >
                     <precision type="int" >1000000</precision>
                     <uncertainty type="int" >0</uncertainty>
                    </uncertainty>
                   </item>
                   <item type="UncertainValue" >
                    <value type="float" >0.027</value>
                    <uncertainty type="Uncertainty" >
                     <precision type="int" >1000000</precision>
                     <uncertainty type="int" >0</uncertainty>
                    </uncertainty>
                   </item>
                   <item type="UncertainValue" >
                    <value type="float" >0.026999999999999993</value>
                    <uncertainty type="Uncertainty" >
                     <precision type="int" >1000000</precision>
                     <uncertainty type="int" >0</uncertainty>
                    </uncertainty>
                   </item>
                   <item type="UncertainValue" >
                    <value type="float" >-2.2393751400565688e-18</value>
                    <uncertainty type="Uncertainty" >
                     <precision type="int" >1000000</precision>
                     <uncertainty type="int" >0</uncertainty>
                    </uncertainty>
                   </item>
                   <item type="UncertainValue" >
                    <value type="float" >0.0079503481963458522</value>
                    <uncertainty type="Uncertainty" >
                     <precision type="int" >1000000</precision>
                     <uncertainty type="int" >0</uncertainty>
                    </uncertainty>
                   </item>
                   <item type="UncertainValue" >
                    <value type="float" >-2.2393751400565677e-18</value>
                    <uncertainty type="Uncertainty" >
                     <precision type="int" >1000000</precision>
                     <uncertainty type="int" >0</uncertainty>
                    </uncertainty>
                   </item>
                  </uvalues>
                  <type type="AtomicDisplacementParameters::Type" >
                   <enumerator type="int" >1</enumerator>
                  </type>
                  <u_equivalent type="float" >0.027</u_equivalent>
                 </value>
                </adps>
               </value>
              </site>
              <annotations type="Annotations" >
               <annotations type="Container" >
                <count type="int" >1</count>
                <item type="Handle" >
                 <serial_number type="int" >221</serial_number>
                 <value type="FileOrdering" >
                  <value type="Handle" >
                   <serial_number type="int" >222</serial_number>
                   <value type="FileOrdering" >
                    <file_order type="int" >35</file_order>
                   </value>
                  </value>
                 </value>
                </item>
               </annotations>
              </annotations>
             </value>
            </item>
            <item type="Handle" >
             <serial_number type="int" >223</serial_number>
             <value type="Atom3d" >
              <element type="Element" >
               <code type="char" >1</code>
              </element>
              <formal_charge type="int" >0</formal_charge>
              <radius type="float" >0.68000000000000005</radius>
              <label type="string" >C16</label>
              <site type="Handle" >
               <serial_number type="int" >224</serial_number>
               <value type="Site" >
                <orthogonal type="Point" >
                 <coordinates type="Vector" >
                  <vector type="Container" >
                   <count type="int" >3</count>
                   <item type="float" >5.2364598260278523</item>
                   <item type="float" >1.4605187449999999</item>
                   <item type="float" >-3.1421845741167407</item>
                  </vector>
                 </coordinates>
                </orthogonal>
                <fractional type="Point" >
                 <coordinates type="Vector" >
                  <vector type="Container" >
                   <count type="int" >3</count>
                   <item type="float" >0.30742999999999998</item>
                   <item type="float" >0.14455000000000001</item>
                   <item type="float" >-0.17549999999999999</item>
                  </vector>
                 </coordinates>
                </fractional>
                <uncertain_value type="UncertainValue" >
                 <value type="float" >1</value>
                 <uncertainty type="Uncertainty" >
                  <precision type="int" >0</precision>
                  <uncertainty type="int" >0</uncertainty>
                 </uncertainty>
                </uncertain_value>
                <uncertainty type="Handle" >
                 <serial_number type="int" >225</serial_number>
                 <value type="Container" >
                  <count type="int" >3</count>
                  <item type="Uncertainty" >
                   <precision type="int" >5</precision>
                   <uncertainty type="int" >15</uncertainty>
                  </item>
                  <item type="Uncertainty" >
                   <precision type="int" >5</precision>
                   <uncertainty type="int" >19</uncertainty>
                  </item>
                  <item type="Uncertainty" >
                   <precision type="int" >5</precision>
                   <uncertainty type="int" >11</uncertainty>
                  </item>
                 </value>
                </uncertainty>
                <adps type="Handle" >
                 <serial_number type="int" >226</serial_number>
                 <value type="AtomicDisplacementParameters" >
                  <uvalues type="Container" >
                   <count type="int" >6</count>
                   <item type="UncertainValue" >
                    <value type="float" >0.032199999999999999</value>
                    <uncertainty type="Uncertainty" >
                     <precision type="int" >4</precision>
                     <uncertainty type="int" >10</uncertainty>
                    </uncertainty>
                   </item>
                   <item type="UncertainValue" >
                    <value type="float" >0.0206</value>
                    <uncertainty type="Uncertainty" >
                     <precision type="int" >4</precision>
                     <uncertainty type="int" >9</uncertainty>
                    </uncertainty>
                   </item>
                   <item type="UncertainValue" >
                    <value type="float" >0.016899999999999998</value>
                    <uncertainty type="Uncertainty" >
                     <precision type="int" >4</precision>
                     <uncertainty type="int" >9</uncertainty>
                    </uncertainty>
                   </item>
                   <item type="UncertainValue" >
                    <value type="float" >0.0025000000000000001</value>
                    <uncertainty type="Uncertainty" >
                     <precision type="int" >4</precision>
                     <uncertainty type="int" >8</uncertainty>
                    </uncertainty>
                   </item>
                   <item type="UncertainValue" >
                    <value type="float" >0.0022000000000000001</value>
                    <uncertainty type="Uncertainty" >
                     <precision type="int" >4</precision>
                     <uncertainty type="int" >7</uncertainty>
                    </uncertainty>
                   </item>
                   <item type="UncertainValue" >
                    <value type="float" >0.00029999999999999997</value>
                    <uncertainty type="Uncertainty" >
                     <precision type="int" >4</precision>
                     <uncertainty type="int" >7</uncertainty>
                    </uncertainty>
                   </item>
                  </uvalues>
                  <type type="AtomicDisplacementParameters::Type" >
                   <enumerator type="int" >0</enumerator>
                  </type>
                  <u_equivalent type="float" >0.024314258177633625</u_equivalent>
                 </value>
                </adps>
               </value>
              </site>
              <annotations type="Annotations" >
               <annotations type="Container" >
                <count type="int" >1</count>
                <item type="Handle" >
                 <serial_number type="int" >227</serial_number>
                 <value type="FileOrdering" >
                  <value type="Handle" >
                   <serial_number type="int" >228</serial_number>
                   <value type="FileOrdering" >
                    <file_order type="int" >36</file_order>
                   </value>
                  </value>
                 </value>
                </item>
               </annotations>
              </annotations>
             </value>
            </item>
            <item type="Handle" >
             <serial_number type="int" >229</serial_number>
             <value type="Atom3d" >
              <element type="Element" >
               <code type="char" >2</code>
              </element>
              <formal_charge type="int" >0</formal_charge>
              <radius type="float" >0.23000000000000001</radius>
              <label type="string" >H16</label>
              <site type="Handle" >
               <serial_number type="int" >230</serial_number>
               <value type="Site" >
                <orthogonal type="Point" >
                 <coordinates type="Vector" >
                  <vector type="Container" >
                   <count type="int" >3</count>
                   <item type="float" >4.9984023604667627</item>
                   <item type="float" >1.4276810699999996</item>
                   <item type="float" >-4.0606692957816346</item>
                  </vector>
                 </coordinates>
                </orthogonal>
                <fractional type="Point" >
                 <coordinates type="Vector" >
                  <vector type="Container" >
                   <count type="int" >3</count>
                   <item type="float" >0.26989999999999997</item>
                   <item type="float" >0.14130000000000001</item>
                   <item type="float" >-0.2268</item>
                  </vector>
                 </coordinates>
                </fractional>
                <uncertain_value type="UncertainValue" >
                 <value type="float" >1</value>
                 <uncertainty type="Uncertainty" >
                  <precision type="int" >0</precision>
                  <uncertainty type="int" >0</uncertainty>
                 </uncertainty>
                </uncertain_value>
                <uncertainty type="Handle" >
                 <serial_number type="int" >231</serial_number>
                 <value type="Container" >
                  <count type="int" >3</count>
                  <item type="Uncertainty" >
                   <precision type="int" >4</precision>
                   <uncertainty type="int" >0</uncertainty>
                  </item>
                  <item type="Uncertainty" >
                   <precision type="int" >4</precision>
                   <uncertainty type="int" >0</uncertainty>
                  </item>
                  <item type="Uncertainty" >
                   <precision type="int" >4</precision>
                   <uncertainty type="int" >0</uncertainty>
                  </item>
                 </value>
                </uncertainty>
                <adps type="Handle" >
                 <serial_number type="int" >232</serial_number>
                 <value type="AtomicDisplacementParameters" >
                  <uvalues type="Container" >
                   <count type="int" >6</count>
                   <item type="UncertainValue" >
                    <value type="float" >0.029000000000000008</value>
                    <uncertainty type="Uncertainty" >
                     <precision type="int" >1000000</precision>
                     <uncertainty type="int" >0</uncertainty>
                    </uncertainty>
                   </item>
                   <item type="UncertainValue" >
                    <value type="float" >0.029000000000000008</value>
                    <uncertainty type="Uncertainty" >
                     <precision type="int" >1000000</precision>
                     <uncertainty type="int" >0</uncertainty>
                    </uncertainty>
                   </item>
                   <item type="UncertainValue" >
                    <value type="float" >0.028999999999999998</value>
                    <uncertainty type="Uncertainty" >
                     <precision type="int" >1000000</precision>
                     <uncertainty type="int" >0</uncertainty>
                    </uncertainty>
                   </item>
                   <item type="UncertainValue" >
                    <value type="float" >-2.4052547800607589e-18</value>
                    <uncertainty type="Uncertainty" >
                     <precision type="int" >1000000</precision>
                     <uncertainty type="int" >0</uncertainty>
                    </uncertainty>
                   </item>
                   <item type="UncertainValue" >
                    <value type="float" >0.0085392628775566564</value>
                    <uncertainty type="Uncertainty" >
                     <precision type="int" >1000000</precision>
                     <uncertainty type="int" >0</uncertainty>
                    </uncertainty>
                   </item>
                   <item type="UncertainValue" >
                    <value type="float" >-2.4052547800607581e-18</value>
                    <uncertainty type="Uncertainty" >
                     <precision type="int" >1000000</precision>
                     <uncertainty type="int" >0</uncertainty>
                    </uncertainty>
                   </item>
                  </uvalues>
                  <type type="AtomicDisplacementParameters::Type" >
                   <enumerator type="int" >1</enumerator>
                  </type>
                  <u_equivalent type="float" >0.029000000000000001</u_equivalent>
                 </value>
                </adps>
               </value>
              </site>
              <annotations type="Annotations" >
               <annotations type="Container" >
                <count type="int" >1</count>
                <item type="Handle" >
                 <serial_number type="int" >233</serial_number>
                 <value type="FileOrdering" >
                  <value type="Handle" >
                   <serial_number type="int" >234</serial_number>
                   <value type="FileOrdering" >
                    <file_order type="int" >37</file_order>
                   </value>
                  </value>
                 </value>
                </item>
               </annotations>
              </annotations>
             </value>
            </item>
            <item type="Handle" >
             <serial_number type="int" >235</serial_number>
             <value type="Atom3d" >
              <element type="Element" >
               <code type="char" >1</code>
              </element>
              <formal_charge type="int" >0</formal_charge>
              <radius type="float" >0.68000000000000005</radius>
              <label type="string" >C17</label>
              <site type="Handle" >
               <serial_number type="int" >236</serial_number>
               <value type="Site" >
                <orthogonal type="Point" >
                 <coordinates type="Vector" >
                  <vector type="Container" >
                   <count type="int" >3</count>
                   <item type="float" >4.2400446672992693</item>
                   <item type="float" >1.4054524899999996</item>
                   <item type="float" >-2.1739262164629896</item>
                  </vector>
                 </coordinates>
                </orthogonal>
                <fractional type="Point" >
                 <coordinates type="Vector" >
                  <vector type="Container" >
                   <count type="int" >3</count>
                   <item type="float" >0.25714999999999999</item>
                   <item type="float" >0.1391</item>
                   <item type="float" >-0.12142</item>
                  </vector>
                 </coordinates>
                </fractional>
                <uncertain_value type="UncertainValue" >
                 <value type="float" >1</value>
                 <uncertainty type="Uncertainty" >
                  <precision type="int" >0</precision>
                  <uncertainty type="int" >0</uncertainty>
                 </uncertainty>
                </uncertain_value>
                <uncertainty type="Handle" >
                 <serial_number type="int" >237</serial_number>
                 <value type="Container" >
                  <count type="int" >3</count>
                  <item type="Uncertainty" >
                   <precision type="int" >5</precision>
                   <uncertainty type="int" >15</uncertainty>
                  </item>
                  <item type="Uncertainty" >
                   <precision type="int" >5</precision>
                   <uncertainty type="int" >18</uncertainty>
                  </item>
                  <item type="Uncertainty" >
                   <precision type="int" >5</precision>
                   <uncertainty type="int" >10</uncertainty>
                  </item>
                 </value>
                </uncertainty>
                <adps type="Handle" >
                 <serial_number type="int" >238</serial_number>
                 <value type="AtomicDisplacementParameters" >
                  <uvalues type="Container" >
                   <count type="int" >6</count>
                   <item type="UncertainValue" >
                    <value type="float" >0.023</value>
                    <uncertainty type="Uncertainty" >
                     <precision type="int" >4</precision>
                     <uncertainty type="int" >9</uncertainty>
                    </uncertainty>
                   </item>
                   <item type="UncertainValue" >
                    <value type="float" >0.020799999999999999</value>
                    <uncertainty type="Uncertainty" >
                     <precision type="int" >4</precision>
                     <uncertainty type="int" >9</uncertainty>
                    </uncertainty>
                   </item>
                   <item type="UncertainValue" >
                    <value type="float" >0.0224</value>
                    <uncertainty type="Uncertainty" >
                     <precision type="int" >4</precision>
                     <uncertainty type="int" >9</uncertainty>
                    </uncertainty>
                   </item>
                   <item type="UncertainValue" >
                    <value type="float" >0.0023999999999999998</value>
                    <uncertainty type="Uncertainty" >
                     <precision type="int" >4</precision>
                     <uncertainty type="int" >7</uncertainty>
                    </uncertainty>
                   </item>
                   <item type="UncertainValue" >
                    <value type="float" >0.00069999999999999999</value>
                    <uncertainty type="Uncertainty" >
                     <precision type="int" >4</precision>
                     <uncertainty type="int" >7</uncertainty>
                    </uncertainty>
                   </item>
                   <item type="UncertainValue" >
                    <value type="float" >-0.00040000000000000002</value>
                    <uncertainty type="Uncertainty" >
                     <precision type="int" >4</precision>
                     <uncertainty type="int" >7</uncertainty>
                    </uncertainty>
                   </item>
                  </uvalues>
                  <type type="AtomicDisplacementParameters::Type" >
                   <enumerator type="int" >0</enumerator>
                  </type>
                  <u_equivalent type="float" >0.023352915141326147</u_equivalent>
                 </value>
                </adps>
               </value>
              </site>
              <annotations type="Annotations" >
               <annotations type="Container" >
                <count type="int" >1</count>
                <item type="Handle" >
                 <serial_number type="int" >239</serial_number>
                 <value type="FileOrdering" >
                  <value type="Handle" >
                   <serial_number type="int" >240</serial_number>
                   <value type="FileOrdering" >
                    <file_order type="int" >38</file_order>
                   </value>
                  </value>
                 </value>
                </item>
               </annotations>
              </annotations>
             </value>
            </item>
            <item type="Handle" >
             <serial_number type="int" >241</serial_number>
             <value type="Atom3d" >
              <element type="Element" >
               <code type="char" >2</code>
              </element>
              <formal_charge type="int" >0</formal_charge>
              <radius type="float" >0.23000000000000001</radius>
              <label type="string" >H17</label>
              <site type="Handle" >
               <serial_number type="int" >242</serial_number>
               <value type="Site" >
                <orthogonal type="Point" >
                 <coordinates type="Vector" >
                  <vector type="Container" >
                   <count type="int" >3</count>
                   <item type="float" >3.3304192162677526</item>
                   <item type="float" >1.3327044099999996</item>
                   <item type="float" >-2.4367596611811306</item>
                  </vector>
                 </coordinates>
                </orthogonal>
                <fractional type="Point" >
                 <coordinates type="Vector" >
                  <vector type="Container" >
                   <count type="int" >3</count>
                   <item type="float" >0.18579999999999999</item>
                   <item type="float" >0.13189999999999999</item>
                   <item type="float" >-0.1361</item>
                  </vector>
                 </coordinates>
                </fractional>
                <uncertain_value type="UncertainValue" >
                 <value type="float" >1</value>
                 <uncertainty type="Uncertainty" >
                  <precision type="int" >0</precision>
                  <uncertainty type="int" >0</uncertainty>
                 </uncertainty>
                </uncertain_value>
                <uncertainty type="Handle" >
                 <serial_number type="int" >243</serial_number>
                 <value type="Container" >
                  <count type="int" >3</count>
                  <item type="Uncertainty" >
                   <precision type="int" >4</precision>
                   <uncertainty type="int" >0</uncertainty>
                  </item>
                  <item type="Uncertainty" >
                   <precision type="int" >4</precision>
                   <uncertainty type="int" >0</uncertainty>
                  </item>
                  <item type="Uncertainty" >
                   <precision type="int" >4</precision>
                   <uncertainty type="int" >0</uncertainty>
                  </item>
                 </value>
                </uncertainty>
                <adps type="Handle" >
                 <serial_number type="int" >244</serial_number>
                 <value type="AtomicDisplacementParameters" >
                  <uvalues type="Container" >
                   <count type="int" >6</count>
                   <item type="UncertainValue" >
                    <value type="float" >0.028000000000000011</value>
                    <uncertainty type="Uncertainty" >
                     <precision type="int" >1000000</precision>
                     <uncertainty type="int" >0</uncertainty>
                    </uncertainty>
                   </item>
                   <item type="UncertainValue" >
                    <value type="float" >0.028000000000000008</value>
                    <uncertainty type="Uncertainty" >
                     <precision type="int" >1000000</precision>
                     <uncertainty type="int" >0</uncertainty>
                    </uncertainty>
                   </item>
                   <item type="UncertainValue" >
                    <value type="float" >0.028000000000000001</value>
                    <uncertainty type="Uncertainty" >
                     <precision type="int" >1000000</precision>
                     <uncertainty type="int" >0</uncertainty>
                    </uncertainty>
                   </item>
                   <item type="UncertainValue" >
                    <value type="float" >-2.3223149600586635e-18</value>
                    <uncertainty type="Uncertainty" >
                     <precision type="int" >1000000</precision>
                     <uncertainty type="int" >0</uncertainty>
                    </uncertainty>
                   </item>
                   <item type="UncertainValue" >
                    <value type="float" >0.0082448055369512534</value>
                    <uncertainty type="Uncertainty" >
                     <precision type="int" >1000000</precision>
                     <uncertainty type="int" >0</uncertainty>
                    </uncertainty>
                   </item>
                   <item type="UncertainValue" >
                    <value type="float" >-2.3223149600586627e-18</value>
                    <uncertainty type="Uncertainty" >
                     <precision type="int" >1000000</precision>
                     <uncertainty type="int" >0</uncertainty>
                    </uncertainty>
                   </item>
                  </uvalues>
                  <type type="AtomicDisplacementParameters::Type" >
                   <enumerator type="int" >1</enumerator>
                  </type>
                  <u_equivalent type="float" >0.028000000000000001</u_equivalent>
                 </value>
                </adps>
               </value>
              </site>
              <annotations type="Annotations" >
               <annotations type="Container" >
                <count type="int" >1</count>
                <item type="Handle" >
                 <serial_number type="int" >245</serial_number>
                 <value type="FileOrdering" >
                  <value type="Handle" >
                   <serial_number type="int" >246</serial_number>
                   <value type="FileOrdering" >
                    <file_order type="int" >39</file_order>
                   </value>
                  </value>
                 </value>
                </item>
               </annotations>
              </annotations>
             </value>
            </item>
            <item type="Handle" >
             <serial_number type="int" >247</serial_number>
             <value type="Atom3d" >
              <element type="Element" >
               <code type="char" >1</code>
              </element>
              <formal_charge type="int" >0</formal_charge>
              <radius type="float" >0.68000000000000005</radius>
              <label type="string" >C18</label>
              <site type="Handle" >
               <serial_number type="int" >248</serial_number>
               <value type="Site" >
                <orthogonal type="Point" >
                 <coordinates type="Vector" >
                  <vector type="Container" >
                   <count type="int" >3</count>
                   <item type="float" >4.5683724240933534</item>
                   <item type="float" >1.4560730289999999</item>
                   <item type="float" >-0.81213385915632685</item>
                  </vector>
                 </coordinates>
                </orthogonal>
                <fractional type="Point" >
                 <coordinates type="Vector" >
                  <vector type="Container" >
                   <count type="int" >3</count>
                   <item type="float" >0.31102000000000002</item>
                   <item type="float" >0.14410999999999999</item>
                   <item type="float" >-0.045359999999999998</item>
                  </vector>
                 </coordinates>
                </fractional>
                <uncertain_value type="UncertainValue" >
                 <value type="float" >1</value>
                 <uncertainty type="Uncertainty" >
                  <precision type="int" >0</precision>
                  <uncertainty type="int" >0</uncertainty>
                 </uncertainty>
                </uncertain_value>
                <uncertainty type="Handle" >
                 <serial_number type="int" >249</serial_number>
                 <value type="Container" >
                  <count type="int" >3</count>
                  <item type="Uncertainty" >
                   <precision type="int" >5</precision>
                   <uncertainty type="int" >14</uncertainty>
                  </item>
                  <item type="Uncertainty" >
                   <precision type="int" >5</precision>
                   <uncertainty type="int" >17</uncertainty>
                  </item>
                  <item type="Uncertainty" >
                   <precision type="int" >5</precision>
                   <uncertainty type="int" >10</uncertainty>
                  </item>
                 </value>
                </uncertainty>
                <adps type="Handle" >
                 <serial_number type="int" >250</serial_number>
                 <value type="AtomicDisplacementParameters" >
                  <uvalues type="Container" >
                   <count type="int" >6</count>
                   <item type="UncertainValue" >
                    <value type="float" >0.023199999999999998</value>
                    <uncertainty type="Uncertainty" >
                     <precision type="int" >4</precision>
                     <uncertainty type="int" >9</uncertainty>
                    </uncertainty>
                   </item>
                   <item type="UncertainValue" >
                    <value type="float" >0.016199999999999999</value>
                    <uncertainty type="Uncertainty" >
                     <precision type="int" >4</precision>
                     <uncertainty type="int" >8</uncertainty>
                    </uncertainty>
                   </item>
                   <item type="UncertainValue" >
                    <value type="float" >0.0201</value>
                    <uncertainty type="Uncertainty" >
                     <precision type="int" >4</precision>
                     <uncertainty type="int" >9</uncertainty>
                    </uncertainty>
                   </item>
                   <item type="UncertainValue" >
                    <value type="float" >0.0016000000000000001</value>
                    <uncertainty type="Uncertainty" >
                     <precision type="int" >4</precision>
                     <uncertainty type="int" >7</uncertainty>
                    </uncertainty>
                   </item>
                   <item type="UncertainValue" >
                    <value type="float" >0.0045999999999999999</value>
                    <uncertainty type="Uncertainty" >
                     <precision type="int" >4</precision>
                     <uncertainty type="int" >7</uncertainty>
                    </uncertainty>
                   </item>
                   <item type="UncertainValue" >
                    <value type="float" >-0.00089999999999999998</value>
                    <uncertainty type="Uncertainty" >
                     <precision type="int" >4</precision>
                     <uncertainty type="int" >6</uncertainty>
                    </uncertainty>
                   </item>
                  </uvalues>
                  <type type="AtomicDisplacementParameters::Type" >
                   <enumerator type="int" >0</enumerator>
                  </type>
                  <u_equivalent type="float" >0.020214854653168527</u_equivalent>
                 </value>
                </adps>
               </value>
              </site>
              <annotations type="Annotations" >
               <annotations type="Container" >
                <count type="int" >1</count>
                <item type="Handle" >
                 <serial_number type="int" >251</serial_number>
                 <value type="FileOrdering" >
                  <value type="Handle" >
                   <serial_number type="int" >252</serial_number>
                   <value type="FileOrdering" >
                    <file_order type="int" >40</file_order>
                   </value>
                  </value>
                 </value>
                </item>
               </annotations>
              </annotations>
             </value>
            </item>
            <item type="Handle" >
             <serial_number type="int" >253</serial_number>
             <value type="Atom3d" >
              <element type="Element" >
               <code type="char" >1</code>
              </element>
              <formal_charge type="int" >0</formal_charge>
              <radius type="float" >0.68000000000000005</radius>
              <label type="string" >C19</label>
              <site type="Handle" >
               <serial_number type="int" >254</serial_number>
               <value type="Site" >
                <orthogonal type="Point" >
                 <coordinates type="Vector" >
                  <vector type="Container" >
                   <count type="int" >3</count>
                   <item type="float" >3.5802264555857355</item>
                   <item type="float" >1.3722106589999998</item>
                   <item type="float" >0.22075860854050949</item>
                  </vector>
                 </coordinates>
                </orthogonal>
                <fractional type="Point" >
                 <coordinates type="Vector" >
                  <vector type="Container" >
                   <count type="int" >3</count>
                   <item type="float" >0.26277</item>
                   <item type="float" >0.13580999999999999</item>
                   <item type="float" >0.012330000000000001</item>
                  </vector>
                 </coordinates>
                </fractional>
                <uncertain_value type="UncertainValue" >
                 <value type="float" >1</value>
                 <uncertainty type="Uncertainty" >
                  <precision type="int" >0</precision>
                  <uncertainty type="int" >0</uncertainty>
                 </uncertainty>
                </uncertain_value>
                <uncertainty type="Handle" >
                 <serial_number type="int" >255</serial_number>
                 <value type="Container" >
                  <count type="int" >3</count>
                  <item type="Uncertainty" >
                   <precision type="int" >5</precision>
                   <uncertainty type="int" >14</uncertainty>
                  </item>
                  <item type="Uncertainty" >
                   <precision type="int" >5</precision>
                   <uncertainty type="int" >18</uncertainty>
                  </item>
                  <item type="Uncertainty" >
                   <precision type="int" >5</precision>
                   <uncertainty type="int" >10</uncertainty>
                  </item>
                 </value>
                </uncertainty>
                <adps type="Handle" >
                 <serial_number type="int" >256</serial_number>
                 <value type="AtomicDisplacementParameters" >
                  <uvalues type="Container" >
                   <count type="int" >6</count>
                   <item type="UncertainValue" >
                    <value type="float" >0.019199999999999998</value>
                    <uncertainty type="Uncertainty" >
                     <precision type="int" >4</precision>
                     <uncertainty type="int" >8</uncertainty>
                    </uncertainty>
                   </item>
                   <item type="UncertainValue" >
                    <value type="float" >0.021399999999999999</value>
                    <uncertainty type="Uncertainty" >
                     <precision type="int" >4</precision>
                     <uncertainty type="int" >9</uncertainty>
                    </uncertainty>
                   </item>
                   <item type="UncertainValue" >
                    <value type="float" >0.021999999999999999</value>
                    <uncertainty type="Uncertainty" >
                     <precision type="int" >4</precision>
                     <uncertainty type="int" >9</uncertainty>
                    </uncertainty>
                   </item>
                   <item type="UncertainValue" >
                    <value type="float" >0.0022000000000000001</value>
                    <uncertainty type="Uncertainty" >
                     <precision type="int" >4</precision>
                     <uncertainty type="int" >7</uncertainty>
                    </uncertainty>
                   </item>
                   <item type="UncertainValue" >
                    <value type="float" >0.0016999999999999999</value>
                    <uncertainty type="Uncertainty" >
                     <precision type="int" >4</precision>
                     <uncertainty type="int" >7</uncertainty>
                    </uncertainty>
                   </item>
                   <item type="UncertainValue" >
                    <value type="float" >0.00080000000000000004</value>
                    <uncertainty type="Uncertainty" >
                     <precision type="int" >4</precision>
                     <uncertainty type="int" >7</uncertainty>
                    </uncertainty>
                   </item>
                  </uvalues>
                  <type type="AtomicDisplacementParameters::Type" >
                   <enumerator type="int" >0</enumerator>
                  </type>
                  <u_equivalent type="float" >0.021805062461763364</u_equivalent>
                 </value>
                </adps>
               </value>
              </site>
              <annotations type="Annotations" >
               <annotations type="Container" >
                <count type="int" >1</count>
                <item type="Handle" >
                 <serial_number type="int" >257</serial_number>
                 <value type="FileOrdering" >
                  <value type="Handle" >
                   <serial_number type="int" >258</serial_number>
                   <value type="FileOrdering" >
                    <file_order type="int" >41</file_order>
                   </value>
                  </value>
                 </value>
                </item>
               </annotations>
              </annotations>
             </value>
            </item>
            <item type="Handle" >
             <serial_number type="int" >259</serial_number>
             <value type="Atom3d" >
              <element type="Element" >
               <code type="char" >2</code>
              </element>
              <formal_charge type="int" >0</formal_charge>
              <radius type="float" >0.23000000000000001</radius>
              <label type="string" >H19</label>
              <site type="Handle" >
               <serial_number type="int" >260</serial_number>
               <value type="Site" >
                <orthogonal type="Point" >
                 <coordinates type="Vector" >
                  <vector type="Container" >
                   <count type="int" >3</count>
                   <item type="float" >2.6653676192617293</item>
                   <item type="float" >1.2872368600000001</item>
                   <item type="float" >-0.021485022729003354</item>
                  </vector>
                 </coordinates>
                </orthogonal>
                <fractional type="Point" >
                 <coordinates type="Vector" >
                  <vector type="Container" >
                   <count type="int" >3</count>
                   <item type="float" >0.1915</item>
                   <item type="float" >0.12740000000000001</item>
                   <item type="float" >-0.0011999999999999999</item>
                  </vector>
                 </coordinates>
                </fractional>
                <uncertain_value type="UncertainValue" >
                 <value type="float" >1</value>
                 <uncertainty type="Uncertainty" >
                  <precision type="int" >0</precision>
                  <uncertainty type="int" >0</uncertainty>
                 </uncertainty>
                </uncertain_value>
                <uncertainty type="Handle" >
                 <serial_number type="int" >261</serial_number>
                 <value type="Container" >
                  <count type="int" >3</count>
                  <item type="Uncertainty" >
                   <precision type="int" >4</precision>
                   <uncertainty type="int" >0</uncertainty>
                  </item>
                  <item type="Uncertainty" >
                   <precision type="int" >4</precision>
                   <uncertainty type="int" >0</uncertainty>
                  </item>
                  <item type="Uncertainty" >
                   <precision type="int" >4</precision>
                   <uncertainty type="int" >0</uncertainty>
                  </item>
                 </value>
                </uncertainty>
                <adps type="Handle" >
                 <serial_number type="int" >262</serial_number>
                 <value type="AtomicDisplacementParameters" >
                  <uvalues type="Container" >
                   <count type="int" >6</count>
                   <item type="UncertainValue" >
                    <value type="float" >0.026000000000000002</value>
                    <uncertainty type="Uncertainty" >
                     <precision type="int" >1000000</precision>
                     <uncertainty type="int" >0</uncertainty>
                    </uncertainty>
                   </item>
                   <item type="UncertainValue" >
                    <value type="float" >0.026000000000000006</value>
                    <uncertainty type="Uncertainty" >
                     <precision type="int" >1000000</precision>
                     <uncertainty type="int" >0</uncertainty>
                    </uncertainty>
                   </item>
                   <item type="UncertainValue" >
                    <value type="float" >0.025999999999999999</value>
                    <uncertainty type="Uncertainty" >
                     <precision type="int" >1000000</precision>
                     <uncertainty type="int" >0</uncertainty>
                    </uncertainty>
                   </item>
                   <item type="UncertainValue" >
                    <value type="float" >-2.1564353200544731e-18</value>
                    <uncertainty type="Uncertainty" >
                     <precision type="int" >1000000</precision>
                     <uncertainty type="int" >0</uncertainty>
                    </uncertainty>
                   </item>
                   <item type="UncertainValue" >
                    <value type="float" >0.007655890855740451</value>
                    <uncertainty type="Uncertainty" >
                     <precision type="int" >1000000</precision>
                     <uncertainty type="int" >0</uncertainty>
                    </uncertainty>
                   </item>
                   <item type="UncertainValue" >
                    <value type="float" >-2.1564353200544723e-18</value>
                    <uncertainty type="Uncertainty" >
                     <precision type="int" >1000000</precision>
                     <uncertainty type="int" >0</uncertainty>
                    </uncertainty>
                   </item>
                  </uvalues>
                  <type type="AtomicDisplacementParameters::Type" >
                   <enumerator type="int" >1</enumerator>
                  </type>
                  <u_equivalent type="float" >0.025999999999999999</u_equivalent>
                 </value>
                </adps>
               </value>
              </site>
              <annotations type="Annotations" >
               <annotations type="Container" >
                <count type="int" >1</count>
                <item type="Handle" >
                 <serial_number type="int" >263</serial_number>
                 <value type="FileOrdering" >
                  <value type="Handle" >
                   <serial_number type="int" >264</serial_number>
                   <value type="FileOrdering" >
                    <file_order type="int" >42</file_order>
                   </value>
                  </value>
                 </value>
                </item>
               </annotations>
              </annotations>
             </value>
            </item>
            <item type="Handle" >
             <serial_number type="int" >265</serial_number>
             <value type="Atom3d" >
              <element type="Element" >
               <code type="char" >1</code>
              </element>
              <formal_charge type="int" >0</formal_charge>
              <radius type="float" >0.68000000000000005</radius>
              <label type="string" >C20</label>
              <site type="Handle" >
               <serial_number type="int" >266</serial_number>
               <value type="Site" >
                <orthogonal type="Point" >
                 <coordinates type="Vector" >
                  <vector type="Container" >
                   <count type="int" >3</count>
                   <item type="float" >3.9135878406571867</item>
                   <item type="float" >1.4105044400000002</item>
                   <item type="float" >1.5324192461461643</item>
                  </vector>
                 </coordinates>
                </orthogonal>
                <fractional type="Point" >
                 <coordinates type="Vector" >
                  <vector type="Container" >
                   <count type="int" >3</count>
                   <item type="float" >0.31589</item>
                   <item type="float" >0.1396</item>
                   <item type="float" >0.085589999999999999</item>
                  </vector>
                 </coordinates>
                </fractional>
                <uncertain_value type="UncertainValue" >
                 <value type="float" >1</value>
                 <uncertainty type="Uncertainty" >
                  <precision type="int" >0</precision>
                  <uncertainty type="int" >0</uncertainty>
                 </uncertainty>
                </uncertain_value>
                <uncertainty type="Handle" >
                 <serial_number type="int" >267</serial_number>
                 <value type="Container" >
                  <count type="int" >3</count>
                  <item type="Uncertainty" >
                   <precision type="int" >5</precision>
                   <uncertainty type="int" >13</uncertainty>
                  </item>
                  <item type="Uncertainty" >
                   <precision type="int" >5</precision>
                   <uncertainty type="int" >18</uncertainty>
                  </item>
                  <item type="Uncertainty" >
                   <precision type="int" >5</precision>
                   <uncertainty type="int" >10</uncertainty>
                  </item>
                 </value>
                </uncertainty>
                <adps type="Handle" >
                 <serial_number type="int" >268</serial_number>
                 <value type="AtomicDisplacementParameters" >
                  <uvalues type="Container" >
                   <count type="int" >6</count>
                   <item type="UncertainValue" >
                    <value type="float" >0.020199999999999999</value>
                    <uncertainty type="Uncertainty" >
                     <precision type="int" >4</precision>
                     <uncertainty type="int" >8</uncertainty>
                    </uncertainty>
                   </item>
                   <item type="UncertainValue" >
                    <value type="float" >0.020899999999999998</value>
                    <uncertainty type="Uncertainty" >
                     <precision type="int" >4</precision>
                     <uncertainty type="int" >9</uncertainty>
                    </uncertainty>
                   </item>
                   <item type="UncertainValue" >
                    <value type="float" >0.020299999999999999</value>
                    <uncertainty type="Uncertainty" >
                     <precision type="int" >4</precision>
                     <uncertainty type="int" >9</uncertainty>
                    </uncertainty>
                   </item>
                   <item type="UncertainValue" >
                    <value type="float" >0.0023</value>
                    <uncertainty type="Uncertainty" >
                     <precision type="int" >4</precision>
                     <uncertainty type="int" >7</uncertainty>
                    </uncertainty>
                   </item>
                   <item type="UncertainValue" >
                    <value type="float" >0.0064999999999999997</value>
                    <uncertainty type="Uncertainty" >
                     <precision type="int" >4</precision>
                     <uncertainty type="int" >7</uncertainty>
                    </uncertainty>
                   </item>
                   <item type="UncertainValue" >
                    <value type="float" >-0.00080000000000000004</value>
                    <uncertainty type="Uncertainty" >
                     <precision type="int" >4</precision>
                     <uncertainty type="int" >7</uncertainty>
                    </uncertainty>
                   </item>
                  </uvalues>
                  <type type="AtomicDisplacementParameters::Type" >
                   <enumerator type="int" >0</enumerator>
                  </type>
                  <u_equivalent type="float" >0.020351191786826792</u_equivalent>
                 </value>
                </adps>
               </value>
              </site>
              <annotations type="Annotations" >
               <annotations type="Container" >
                <count type="int" >1</count>
                <item type="Handle" >
                 <serial_number type="int" >269</serial_number>
                 <value type="FileOrdering" >
                  <value type="Handle" >
                   <serial_number type="int" >270</serial_number>
                   <value type="FileOrdering" >
                    <file_order type="int" >43</file_order>
                   </value>
                  </value>
                 </value>
                </item>
               </annotations>
              </annotations>
             </value>
            </item>
            <item type="Handle" >
             <serial_number type="int" >271</serial_number>
             <value type="Atom3d" >
              <element type="Element" >
               <code type="char" >2</code>
              </element>
              <formal_charge type="int" >0</formal_charge>
              <radius type="float" >0.23000000000000001</radius>
              <label type="string" >H20</label>
              <site type="Handle" >
               <serial_number type="int" >272</serial_number>
               <value type="Site" >
                <orthogonal type="Point" >
                 <coordinates type="Vector" >
                  <vector type="Container" >
                   <count type="int" >3</count>
                   <item type="float" >3.2308328352421292</item>
                   <item type="float" >1.3407875300000003</item>
                   <item type="float" >2.1896818997975922</item>
                  </vector>
                 </coordinates>
                </orthogonal>
                <fractional type="Point" >
                 <coordinates type="Vector" >
                  <vector type="Container" >
                   <count type="int" >3</count>
                   <item type="float" >0.28129999999999999</item>
                   <item type="float" >0.13270000000000001</item>
                   <item type="float" >0.12230000000000001</item>
                  </vector>
                 </coordinates>
                </fractional>
                <uncertain_value type="UncertainValue" >
                 <value type="float" >1</value>
                 <uncertainty type="Uncertainty" >
                  <precision type="int" >0</precision>
                  <uncertainty type="int" >0</uncertainty>
                 </uncertainty>
                </uncertain_value>
                <uncertainty type="Handle" >
                 <serial_number type="int" >273</serial_number>
                 <value type="Container" >
                  <count type="int" >3</count>
                  <item type="Uncertainty" >
                   <precision type="int" >4</precision>
                   <uncertainty type="int" >0</uncertainty>
                  </item>
                  <item type="Uncertainty" >
                   <precision type="int" >4</precision>
                   <uncertainty type="int" >0</uncertainty>
                  </item>
                  <item type="Uncertainty" >
                   <precision type="int" >4</precision>
                   <uncertainty type="int" >0</uncertainty>
                  </item>
                 </value>
                </uncertainty>
                <adps type="Handle" >
                 <serial_number type="int" >274</serial_number>
                 <value type="AtomicDisplacementParameters" >
                  <uvalues type="Container" >
                   <count type="int" >6</count>
                   <item type="UncertainValue" >
                    <value type="float" >0.024000000000000004</value>
                    <uncertainty type="Uncertainty" >
                     <precision type="int" >1000000</precision>
                     <uncertainty type="int" >0</uncertainty>
                    </uncertainty>
                   </item>
                   <item type="UncertainValue" >
                    <value type="float" >0.024000000000000004</value>
                    <uncertainty type="Uncertainty" >
                     <precision type="int" >1000000</precision>
                     <uncertainty type="int" >0</uncertainty>
                    </uncertainty>
                   </item>
                   <item type="UncertainValue" >
                    <value type="float" >0.024</value>
                    <uncertainty type="Uncertainty" >
                     <precision type="int" >1000000</precision>
                     <uncertainty type="int" >0</uncertainty>
                    </uncertainty>
                   </item>
                   <item type="UncertainValue" >
                    <value type="float" >-1.990555680050283e-18</value>
                    <uncertainty type="Uncertainty" >
                     <precision type="int" >1000000</precision>
                     <uncertainty type="int" >0</uncertainty>
                    </uncertainty>
                   </item>
                   <item type="UncertainValue" >
                    <value type="float" >0.0070669761745296459</value>
                    <uncertainty type="Uncertainty" >
                     <precision type="int" >1000000</precision>
                     <uncertainty type="int" >0</uncertainty>
                    </uncertainty>
                   </item>
                   <item type="UncertainValue" >
                    <value type="float" >-1.9905556800502823e-18</value>
                    <uncertainty type="Uncertainty" >
                     <precision type="int" >1000000</precision>
                     <uncertainty type="int" >0</uncertainty>
                    </uncertainty>
                   </item>
                  </uvalues>
                  <type type="AtomicDisplacementParameters::Type" >
                   <enumerator type="int" >1</enumerator>
                  </type>
                  <u_equivalent type="float" >0.024</u_equivalent>
                 </value>
                </adps>
               </value>
              </site>
              <annotations type="Annotations" >
               <annotations type="Container" >
                <count type="int" >1</count>
                <item type="Handle" >
                 <serial_number type="int" >275</serial_number>
                 <value type="FileOrdering" >
                  <value type="Handle" >
                   <serial_number type="int" >276</serial_number>
                   <value type="FileOrdering" >
                    <file_order type="int" >44</file_order>
                   </value>
                  </value>
                 </value>
                </item>
               </annotations>
              </annotations>
             </value>
            </item>
            <item type="Handle" >
             <serial_number type="int" >277</serial_number>
             <value type="Atom3d" >
              <element type="Element" >
               <code type="char" >1</code>
              </element>
              <formal_charge type="int" >0</formal_charge>
              <radius type="float" >0.68000000000000005</radius>
              <label type="string" >C21</label>
              <site type="Handle" >
               <serial_number type="int" >278</serial_number>
               <value type="Site" >
                <orthogonal type="Point" >
                 <coordinates type="Vector" >
                  <vector type="Container" >
                   <count type="int" >3</count>
                   <item type="float" >5.2841934469488843</item>
                   <item type="float" >1.5549902100000002</item>
                   <item type="float" >1.9483334778084542</item>
                  </vector>
                 </coordinates>
                </orthogonal>
                <fractional type="Point" >
                 <coordinates type="Vector" >
                  <vector type="Container" >
                   <count type="int" >3</count>
                   <item type="float" >0.42383999999999999</item>
                   <item type="float" >0.15390000000000001</item>
                   <item type="float" >0.10882</item>
                  </vector>
                 </coordinates>
                </fractional>
                <uncertain_value type="UncertainValue" >
                 <value type="float" >1</value>
                 <uncertainty type="Uncertainty" >
                  <precision type="int" >0</precision>
                  <uncertainty type="int" >0</uncertainty>
                 </uncertainty>
                </uncertain_value>
                <uncertainty type="Handle" >
                 <serial_number type="int" >279</serial_number>
                 <value type="Container" >
                  <count type="int" >3</count>
                  <item type="Uncertainty" >
                   <precision type="int" >5</precision>
                   <uncertainty type="int" >13</uncertainty>
                  </item>
                  <item type="Uncertainty" >
                   <precision type="int" >5</precision>
                   <uncertainty type="int" >16</uncertainty>
                  </item>
                  <item type="Uncertainty" >
                   <precision type="int" >5</precision>
                   <uncertainty type="int" >9</uncertainty>
                  </item>
                 </value>
                </uncertainty>
                <adps type="Handle" >
                 <serial_number type="int" >280</serial_number>
                 <value type="AtomicDisplacementParameters" >
                  <uvalues type="Container" >
                   <count type="int" >6</count>
                   <item type="UncertainValue" >
                    <value type="float" >0.017600000000000001</value>
                    <uncertainty type="Uncertainty" >
                     <precision type="int" >4</precision>
                     <uncertainty type="int" >8</uncertainty>
                    </uncertainty>
                   </item>
                   <item type="UncertainValue" >
                    <value type="float" >0.013599999999999999</value>
                    <uncertainty type="Uncertainty" >
                     <precision type="int" >4</precision>
                     <uncertainty type="int" >7</uncertainty>
                    </uncertainty>
                   </item>
                   <item type="UncertainValue" >
                    <value type="float" >0.016</value>
                    <uncertainty type="Uncertainty" >
                     <precision type="int" >4</precision>
                     <uncertainty type="int" >8</uncertainty>
                    </uncertainty>
                   </item>
                   <item type="UncertainValue" >
                    <value type="float" >0.001</value>
                    <uncertainty type="Uncertainty" >
                     <precision type="int" >4</precision>
                     <uncertainty type="int" >6</uncertainty>
                    </uncertainty>
                   </item>
                   <item type="UncertainValue" >
                    <value type="float" >0.0038</value>
                    <uncertainty type="Uncertainty" >
                     <precision type="int" >4</precision>
                     <uncertainty type="int" >6</uncertainty>
                    </uncertainty>
                   </item>
                   <item type="UncertainValue" >
                    <value type="float" >-0.00029999999999999997</value>
                    <uncertainty type="Uncertainty" >
                     <precision type="int" >4</precision>
                     <uncertainty type="int" >6</uncertainty>
                    </uncertainty>
                   </item>
                  </uvalues>
                  <type type="AtomicDisplacementParameters::Type" >
                   <enumerator type="int" >0</enumerator>
                  </type>
                  <u_equivalent type="float" >0.015979846058804356</u_equivalent>
                 </value>
                </adps>
               </value>
              </site>
              <annotations type="Annotations" >
               <annotations type="Container" >
                <count type="int" >1</count>
                <item type="Handle" >
                 <serial_number type="int" >281</serial_number>
                 <value type="FileOrdering" >
                  <value type="Handle" >
                   <serial_number type="int" >282</serial_number>
                   <value type="FileOrdering" >
                    <file_order type="int" >45</file_order>
                   </value>
                  </value>
                 </value>
                </item>
               </annotations>
              </annotations>
             </value>
            </item>
            <item type="Handle" >
             <serial_number type="int" >283</serial_number>
             <value type="Atom3d" >
              <element type="Element" >
               <code type="char" >1</code>
              </element>
              <formal_charge type="int" >0</formal_charge>
              <radius type="float" >0.68000000000000005</radius>
              <label type="string" >C22</label>
              <site type="Handle" >
               <serial_number type="int" >284</serial_number>
               <value type="Site" >
                <orthogonal type="Point" >
                 <coordinates type="Vector" >
                  <vector type="Container" >
                   <count type="int" >3</count>
                   <item type="float" >6.295223086434711</item>
                   <item type="float" >1.6406712819999998</item>
                   <item type="float" >0.94390866522754746</item>
                  </vector>
                 </coordinates>
                </orthogonal>
                <fractional type="Point" >
                 <coordinates type="Vector" >
                  <vector type="Container" >
                   <count type="int" >3</count>
                   <item type="float" >0.47437000000000001</item>
                   <item type="float" >0.16238</item>
                   <item type="float" >0.052720000000000003</item>
                  </vector>
                 </coordinates>
                </fractional>
                <uncertain_value type="UncertainValue" >
                 <value type="float" >1</value>
                 <uncertainty type="Uncertainty" >
                  <precision type="int" >0</precision>
                  <uncertainty type="int" >0</uncertainty>
                 </uncertainty>
                </uncertain_value>
                <uncertainty type="Handle" >
                 <serial_number type="int" >285</serial_number>
                 <value type="Container" >
                  <count type="int" >3</count>
                  <item type="Uncertainty" >
                   <precision type="int" >5</precision>
                   <uncertainty type="int" >13</uncertainty>
                  </item>
                  <item type="Uncertainty" >
                   <precision type="int" >5</precision>
                   <uncertainty type="int" >16</uncertainty>
                  </item>
                  <item type="Uncertainty" >
                   <precision type="int" >5</precision>
                   <uncertainty type="int" >10</uncertainty>
                  </item>
                 </value>
                </uncertainty>
                <adps type="Handle" >
                 <serial_number type="int" >286</serial_number>
                 <value type="AtomicDisplacementParameters" >
                  <uvalues type="Container" >
                   <count type="int" >6</count>
                   <item type="UncertainValue" >
                    <value type="float" >0.020199999999999999</value>
                    <uncertainty type="Uncertainty" >
                     <precision type="int" >4</precision>
                     <uncertainty type="int" >8</uncertainty>
                    </uncertainty>
                   </item>
                   <item type="UncertainValue" >
                    <value type="float" >0.0126</value>
                    <uncertainty type="Uncertainty" >
                     <precision type="int" >4</precision>
                     <uncertainty type="int" >7</uncertainty>
                    </uncertainty>
                   </item>
                   <item type="UncertainValue" >
                    <value type="float" >0.017899999999999999</value>
                    <uncertainty type="Uncertainty" >
                     <precision type="int" >4</precision>
                     <uncertainty type="int" >8</uncertainty>
                    </uncertainty>
                   </item>
                   <item type="UncertainValue" >
                    <value type="float" >0.0015</value>
                    <uncertainty type="Uncertainty" >
                     <precision type="int" >4</precision>
                     <uncertainty type="int" >6</uncertainty>
                    </uncertainty>
                   </item>
                   <item type="UncertainValue" >
                    <value type="float" >0.0054999999999999997</value>
                    <uncertainty type="Uncertainty" >
                     <precision type="int" >4</precision>
                     <uncertainty type="int" >7</uncertainty>
                    </uncertainty>
                   </item>
                   <item type="UncertainValue" >
                    <value type="float" >0.00020000000000000001</value>
                    <uncertainty type="Uncertainty" >
                     <precision type="int" >4</precision>
                     <uncertainty type="int" >6</uncertainty>
                    </uncertainty>
                   </item>
                  </uvalues>
                  <type type="AtomicDisplacementParameters::Type" >
                   <enumerator type="int" >0</enumerator>
                  </type>
                  <u_equivalent type="float" >0.016923517242992819</u_equivalent>
                 </value>
                </adps>
               </value>
              </site>
              <annotations type="Annotations" >
               <annotations type="Container" >
                <count type="int" >1</count>
                <item type="Handle" >
                 <serial_number type="int" >287</serial_number>
                 <value type="FileOrdering" >
                  <value type="Handle" >
                   <serial_number type="int" >288</serial_number>
                   <value type="FileOrdering" >
                    <file_order type="int" >46</file_order>
                   </value>
                  </value>
                 </value>
                </item>
               </annotations>
              </annotations>
             </value>
            </item>
            <item type="Handle" >
             <serial_number type="int" >289</serial_number>
             <value type="Atom3d" >
              <element type="Element" >
               <code type="char" >1</code>
              </element>
              <formal_charge type="int" >0</formal_charge>
              <radius type="float" >0.68000000000000005</radius>
              <label type="string" >C23</label>
              <site type="Handle" >
               <serial_number type="int" >290</serial_number>
               <value type="Site" >
                <orthogonal type="Point" >
                 <coordinates type="Vector" >
                  <vector type="Container" >
                   <count type="int" >3</count>
                   <item type="float" >5.9360648790377057</item>
                   <item type="float" >1.5803509989999998</item>
                   <item type="float" >-0.43542979397446802</item>
                  </vector>
                 </coordinates>
                </orthogonal>
                <fractional type="Point" >
                 <coordinates type="Vector" >
                  <vector type="Container" >
                   <count type="int" >3</count>
                   <item type="float" >0.41788999999999998</item>
                   <item type="float" >0.15640999999999999</item>
                   <item type="float" >-0.024320000000000001</item>
                  </vector>
                 </coordinates>
                </fractional>
                <uncertain_value type="UncertainValue" >
                 <value type="float" >1</value>
                 <uncertainty type="Uncertainty" >
                  <precision type="int" >0</precision>
                  <uncertainty type="int" >0</uncertainty>
                 </uncertainty>
                </uncertain_value>
                <uncertainty type="Handle" >
                 <serial_number type="int" >291</serial_number>
                 <value type="Container" >
                  <count type="int" >3</count>
                  <item type="Uncertainty" >
                   <precision type="int" >5</precision>
                   <uncertainty type="int" >13</uncertainty>
                  </item>
                  <item type="Uncertainty" >
                   <precision type="int" >5</precision>
                   <uncertainty type="int" >16</uncertainty>
                  </item>
                  <item type="Uncertainty" >
                   <precision type="int" >5</precision>
                   <uncertainty type="int" >10</uncertainty>
                  </item>
                 </value>
                </uncertainty>
                <adps type="Handle" >
                 <serial_number type="int" >292</serial_number>
                 <value type="AtomicDisplacementParameters" >
                  <uvalues type="Container" >
                   <count type="int" >6</count>
                   <item type="UncertainValue" >
                    <value type="float" >0.0235</value>
                    <uncertainty type="Uncertainty" >
                     <precision type="int" >4</precision>
                     <uncertainty type="int" >8</uncertainty>
                    </uncertainty>
                   </item>
                   <item type="UncertainValue" >
                    <value type="float" >0.0129</value>
                    <uncertainty type="Uncertainty" >
                     <precision type="int" >4</precision>
                     <uncertainty type="int" >8</uncertainty>
                    </uncertainty>
                   </item>
                   <item type="UncertainValue" >
                    <value type="float" >0.017000000000000001</value>
                    <uncertainty type="Uncertainty" >
                     <precision type="int" >4</precision>
                     <uncertainty type="int" >8</uncertainty>
                    </uncertainty>
                   </item>
                   <item type="UncertainValue" >
                    <value type="float" >0.0020999999999999999</value>
                    <uncertainty type="Uncertainty" >
                     <precision type="int" >4</precision>
                     <uncertainty type="int" >6</uncertainty>
                    </uncertainty>
                   </item>
                   <item type="UncertainValue" >
                    <value type="float" >0.0050000000000000001</value>
                    <uncertainty type="Uncertainty" >
                     <precision type="int" >4</precision>
                     <uncertainty type="int" >7</uncertainty>
                    </uncertainty>
                   </item>
                   <item type="UncertainValue" >
                    <value type="float" >0.00080000000000000004</value>
                    <uncertainty type="Uncertainty" >
                     <precision type="int" >4</precision>
                     <uncertainty type="int" >6</uncertainty>
                    </uncertainty>
                   </item>
                  </uvalues>
                  <type type="AtomicDisplacementParameters::Type" >
                   <enumerator type="int" >0</enumerator>
                  </type>
                  <u_equivalent type="float" >0.018006937244443761</u_equivalent>
                 </value>
                </adps>
               </value>
              </site>
              <annotations type="Annotations" >
               <annotations type="Container" >
                <count type="int" >1</count>
                <item type="Handle" >
                 <serial_number type="int" >293</serial_number>
                 <value type="FileOrdering" >
                  <value type="Handle" >
                   <serial_number type="int" >294</serial_number>
                   <value type="FileOrdering" >
                    <file_order type="int" >47</file_order>
                   </value>
                  </value>
                 </value>
                </item>
               </annotations>
              </annotations>
             </value>
            </item>
            <item type="Handle" >
             <serial_number type="int" >295</serial_number>
             <value type="Atom3d" >
              <element type="Element" >
               <code type="char" >1</code>
              </element>
              <formal_charge type="int" >0</formal_charge>
              <radius type="float" >0.68000000000000005</radius>
              <label type="string" >C24</label>
              <site type="Handle" >
               <serial_number type="int" >296</serial_number>
               <value type="Site" >
                <orthogonal type="Point" >
                 <coordinates type="Vector" >
                  <vector type="Container" >
                   <count type="int" >3</count>
                   <item type="float" >8.6022721184572202</item>
                   <item type="float" >5.2435199439999991</item>
                   <item type="float" >1.875821526098068</item>
                  </vector>
                 </coordinates>
                </orthogonal>
                <fractional type="Point" >
                 <coordinates type="Vector" >
                  <vector type="Container" >
                   <count type="int" >3</count>
                   <item type="float" >0.66122000000000003</item>
                   <item type="float" >0.51895999999999998</item>
                   <item type="float" >0.10477</item>
                  </vector>
                 </coordinates>
                </fractional>
                <uncertain_value type="UncertainValue" >
                 <value type="float" >1</value>
                 <uncertainty type="Uncertainty" >
                  <precision type="int" >0</precision>
                  <uncertainty type="int" >0</uncertainty>
                 </uncertainty>
                </uncertain_value>
                <uncertainty type="Handle" >
                 <serial_number type="int" >297</serial_number>
                 <value type="Container" >
                  <count type="int" >3</count>
                  <item type="Uncertainty" >
                   <precision type="int" >5</precision>
                   <uncertainty type="int" >15</uncertainty>
                  </item>
                  <item type="Uncertainty" >
                   <precision type="int" >5</precision>
                   <uncertainty type="int" >18</uncertainty>
                  </item>
                  <item type="Uncertainty" >
                   <precision type="int" >5</precision>
                   <uncertainty type="int" >11</uncertainty>
                  </item>
                 </value>
                </uncertainty>
                <adps type="Handle" >
                 <serial_number type="int" >298</serial_number>
                 <value type="AtomicDisplacementParameters" >
                  <uvalues type="Container" >
                   <count type="int" >6</count>
                   <item type="UncertainValue" >
                    <value type="float" >0.0269</value>
                    <uncertainty type="Uncertainty" >
                     <precision type="int" >4</precision>
                     <uncertainty type="int" >9</uncertainty>
                    </uncertainty>
                   </item>
                   <item type="UncertainValue" >
                    <value type="float" >0.015599999999999999</value>
                    <uncertainty type="Uncertainty" >
                     <precision type="int" >4</precision>
                     <uncertainty type="int" >8</uncertainty>
                    </uncertainty>
                   </item>
                   <item type="UncertainValue" >
                    <value type="float" >0.0281</value>
                    <uncertainty type="Uncertainty" >
                     <precision type="int" >4</precision>
                     <uncertainty type="int" >10</uncertainty>
                    </uncertainty>
                   </item>
                   <item type="UncertainValue" >
                    <value type="float" >0.0025000000000000001</value>
                    <uncertainty type="Uncertainty" >
                     <precision type="int" >4</precision>
                     <uncertainty type="int" >7</uncertainty>
                    </uncertainty>
                   </item>
                   <item type="UncertainValue" >
                    <value type="float" >0.00050000000000000001</value>
                    <uncertainty type="Uncertainty" >
                     <precision type="int" >4</precision>
                     <uncertainty type="int" >8</uncertainty>
                    </uncertainty>
                   </item>
                   <item type="UncertainValue" >
                    <value type="float" >-0.00029999999999999997</value>
                    <uncertainty type="Uncertainty" >
                     <precision type="int" >4</precision>
                     <uncertainty type="int" >7</uncertainty>
                    </uncertainty>
                   </item>
                  </uvalues>
                  <type type="AtomicDisplacementParameters::Type" >
                   <enumerator type="int" >0</enumerator>
                  </type>
                  <u_equivalent type="float" >0.025166367264656223</u_equivalent>
                 </value>
                </adps>
               </value>
              </site>
              <annotations type="Annotations" >
               <annotations type="Container" >
                <count type="int" >1</count>
                <item type="Handle" >
                 <serial_number type="int" >299</serial_number>
                 <value type="FileOrdering" >
                  <value type="Handle" >
                   <serial_number type="int" >300</serial_number>
                   <value type="FileOrdering" >
                    <file_order type="int" >48</file_order>
                   </value>
                  </value>
                 </value>
                </item>
               </annotations>
              </annotations>
             </value>
            </item>
            <item type="Handle" >
             <serial_number type="int" >301</serial_number>
             <value type="Atom3d" >
              <element type="Element" >
               <code type="char" >1</code>
              </element>
              <formal_charge type="int" >0</formal_charge>
              <radius type="float" >0.68000000000000005</radius>
              <label type="string" >C25</label>
              <site type="Handle" >
               <serial_number type="int" >302</serial_number>
               <value type="Site" >
                <orthogonal type="Point" >
                 <coordinates type="Vector" >
                  <vector type="Container" >
                   <count type="int" >3</count>
                   <item type="float" >7.3421464532087901</item>
                   <item type="float" >5.2149259069999996</item>
                   <item type="float" >2.4797297066391377</item>
                  </vector>
                 </coordinates>
                </orthogonal>
                <fractional type="Point" >
                 <coordinates type="Vector" >
                  <vector type="Container" >
                   <count type="int" >3</count>
                   <item type="float" >0.58386000000000005</item>
                   <item type="float" >0.51612999999999998</item>
                   <item type="float" >0.13850000000000001</item>
                  </vector>
                 </coordinates>
                </fractional>
                <uncertain_value type="UncertainValue" >
                 <value type="float" >1</value>
                 <uncertainty type="Uncertainty" >
                  <precision type="int" >0</precision>
                  <uncertainty type="int" >0</uncertainty>
                 </uncertainty>
                </uncertain_value>
                <uncertainty type="Handle" >
                 <serial_number type="int" >303</serial_number>
                 <value type="Container" >
                  <count type="int" >3</count>
                  <item type="Uncertainty" >
                   <precision type="int" >5</precision>
                   <uncertainty type="int" >16</uncertainty>
                  </item>
                  <item type="Uncertainty" >
                   <precision type="int" >5</precision>
                   <uncertainty type="int" >19</uncertainty>
                  </item>
                  <item type="Uncertainty" >
                   <precision type="int" >5</precision>
                   <uncertainty type="int" >11</uncertainty>
                  </item>
                 </value>
                </uncertainty>
                <adps type="Handle" >
                 <serial_number type="int" >304</serial_number>
                 <value type="AtomicDisplacementParameters" >
                  <uvalues type="Container" >
                   <count type="int" >6</count>
                   <item type="UncertainValue" >
                    <value type="float" >0.038899999999999997</value>
                    <uncertainty type="Uncertainty" >
                     <precision type="int" >4</precision>
                     <uncertainty type="int" >11</uncertainty>
                    </uncertainty>
                   </item>
                   <item type="UncertainValue" >
                    <value type="float" >0.019199999999999998</value>
                    <uncertainty type="Uncertainty" >
                     <precision type="int" >4</precision>
                     <uncertainty type="int" >9</uncertainty>
                    </uncertainty>
                   </item>
                   <item type="UncertainValue" >
                    <value type="float" >0.0178</value>
                    <uncertainty type="Uncertainty" >
                     <precision type="int" >4</precision>
                     <uncertainty type="int" >9</uncertainty>
                    </uncertainty>
                   </item>
                   <item type="UncertainValue" >
                    <value type="float" >0.0058999999999999999</value>
                    <uncertainty type="Uncertainty" >
                     <precision type="int" >4</precision>
                     <uncertainty type="int" >8</uncertainty>
                    </uncertainty>
                   </item>
                   <item type="UncertainValue" >
                    <value type="float" >0.0051000000000000004</value>
                    <uncertainty type="Uncertainty" >
                     <precision type="int" >4</precision>
                     <uncertainty type="int" >8</uncertainty>
                    </uncertainty>
                   </item>
                   <item type="UncertainValue" >
                    <value type="float" >-0.0011999999999999999</value>
                    <uncertainty type="Uncertainty" >
                     <precision type="int" >4</precision>
                     <uncertainty type="int" >7</uncertainty>
                    </uncertainty>
                   </item>
                  </uvalues>
                  <type type="AtomicDisplacementParameters::Type" >
                   <enumerator type="int" >0</enumerator>
                  </type>
                  <u_equivalent type="float" >0.025998100832980531</u_equivalent>
                 </value>
                </adps>
               </value>
              </site>
              <annotations type="Annotations" >
               <annotations type="Container" >
                <count type="int" >1</count>
                <item type="Handle" >
                 <serial_number type="int" >305</serial_number>
                 <value type="FileOrdering" >
                  <value type="Handle" >
                   <serial_number type="int" >306</serial_number>
                   <value type="FileOrdering" >
                    <file_order type="int" >49</file_order>
                   </value>
                  </value>
                 </value>
                </item>
               </annotations>
              </annotations>
             </value>
            </item>
            <item type="Handle" >
             <serial_number type="int" >307</serial_number>
             <value type="Atom3d" >
              <element type="Element" >
               <code type="char" >1</code>
              </element>
              <formal_charge type="int" >0</formal_charge>
              <radius type="float" >0.68000000000000005</radius>
              <label type="string" >C26</label>
              <site type="Handle" >
               <serial_number type="int" >308</serial_number>
               <value type="Site" >
                <orthogonal type="Point" >
                 <coordinates type="Vector" >
                  <vector type="Container" >
                   <count type="int" >3</count>
                   <item type="float" >6.2258240571416676</item>
                   <item type="float" >5.1001456030000005</item>
                   <item type="float" >1.7211293624492436</item>
                  </vector>
                 </coordinates>
                </orthogonal>
                <fractional type="Point" >
                 <coordinates type="Vector" >
                  <vector type="Container" >
                   <count type="int" >3</count>
                   <item type="float" >0.48662</item>
                   <item type="float" >0.50477000000000005</item>
                   <item type="float" >0.096129999999999993</item>
                  </vector>
                 </coordinates>
                </fractional>
                <uncertain_value type="UncertainValue" >
                 <value type="float" >1</value>
                 <uncertainty type="Uncertainty" >
                  <precision type="int" >0</precision>
                  <uncertainty type="int" >0</uncertainty>
                 </uncertainty>
                </uncertain_value>
                <uncertainty type="Handle" >
                 <serial_number type="int" >309</serial_number>
                 <value type="Container" >
                  <count type="int" >3</count>
                  <item type="Uncertainty" >
                   <precision type="int" >5</precision>
                   <uncertainty type="int" >15</uncertainty>
                  </item>
                  <item type="Uncertainty" >
                   <precision type="int" >5</precision>
                   <uncertainty type="int" >18</uncertainty>
                  </item>
                  <item type="Uncertainty" >
                   <precision type="int" >5</precision>
                   <uncertainty type="int" >11</uncertainty>
                  </item>
                 </value>
                </uncertainty>
                <adps type="Handle" >
                 <serial_number type="int" >310</serial_number>
                 <value type="AtomicDisplacementParameters" >
                  <uvalues type="Container" >
                   <count type="int" >6</count>
                   <item type="UncertainValue" >
                    <value type="float" >0.032800000000000003</value>
                    <uncertainty type="Uncertainty" >
                     <precision type="int" >4</precision>
                     <uncertainty type="int" >10</uncertainty>
                    </uncertainty>
                   </item>
                   <item type="UncertainValue" >
                    <value type="float" >0.0184</value>
                    <uncertainty type="Uncertainty" >
                     <precision type="int" >4</precision>
                     <uncertainty type="int" >9</uncertainty>
                    </uncertainty>
                   </item>
                   <item type="UncertainValue" >
                    <value type="float" >0.021999999999999999</value>
                    <uncertainty type="Uncertainty" >
                     <precision type="int" >4</precision>
                     <uncertainty type="int" >9</uncertainty>
                    </uncertainty>
                   </item>
                   <item type="UncertainValue" >
                    <value type="float" >0.0057000000000000002</value>
                    <uncertainty type="Uncertainty" >
                     <precision type="int" >4</precision>
                     <uncertainty type="int" >7</uncertainty>
                    </uncertainty>
                   </item>
                   <item type="UncertainValue" >
                    <value type="float" >0.0124</value>
                    <uncertainty type="Uncertainty" >
                     <precision type="int" >4</precision>
                     <uncertainty type="int" >8</uncertainty>
                    </uncertainty>
                   </item>
                   <item type="UncertainValue" >
                    <value type="float" >0.002</value>
                    <uncertainty type="Uncertainty" >
                     <precision type="int" >4</precision>
                     <uncertainty type="int" >7</uncertainty>
                    </uncertainty>
                   </item>
                  </uvalues>
                  <type type="AtomicDisplacementParameters::Type" >
                   <enumerator type="int" >0</enumerator>
                  </type>
                  <u_equivalent type="float" >0.023468901970893043</u_equivalent>
                 </value>
                </adps>
               </value>
              </site>
              <annotations type="Annotations" >
               <annotations type="Container" >
                <count type="int" >1</count>
                <item type="Handle" >
                 <serial_number type="int" >311</serial_number>
                 <value type="FileOrdering" >
                  <value type="Handle" >
                   <serial_number type="int" >312</serial_number>
                   <value type="FileOrdering" >
                    <file_order type="int" >50</file_order>
                   </value>
                  </value>
                 </value>
                </item>
               </annotations>
              </annotations>
             </value>
            </item>
            <item type="Handle" >
             <serial_number type="int" >313</serial_number>
             <value type="Atom3d" >
              <element type="Element" >
               <code type="char" >1</code>
              </element>
              <formal_charge type="int" >0</formal_charge>
              <radius type="float" >0.68000000000000005</radius>
              <label type="string" >C27</label>
              <site type="Handle" >
               <serial_number type="int" >314</serial_number>
               <value type="Site" >
                <orthogonal type="Point" >
                 <coordinates type="Vector" >
                  <vector type="Container" >
                   <count type="int" >3</count>
                   <item type="float" >6.2962478366434089</item>
                   <item type="float" >5.0304286929999993</item>
                   <item type="float" >0.30974241100979838</item>
                  </vector>
                 </coordinates>
                </orthogonal>
                <fractional type="Point" >
                 <coordinates type="Vector" >
                  <vector type="Container" >
                   <count type="int" >3</count>
                   <item type="float" >0.46037</item>
                   <item type="float" >0.49786999999999998</item>
                   <item type="float" >0.017299999999999999</item>
                  </vector>
                 </coordinates>
                </fractional>
                <uncertain_value type="UncertainValue" >
                 <value type="float" >1</value>
                 <uncertainty type="Uncertainty" >
                  <precision type="int" >0</precision>
                  <uncertainty type="int" >0</uncertainty>
                 </uncertainty>
                </uncertain_value>
                <uncertainty type="Handle" >
                 <serial_number type="int" >315</serial_number>
                 <value type="Container" >
                  <count type="int" >3</count>
                  <item type="Uncertainty" >
                   <precision type="int" >5</precision>
                   <uncertainty type="int" >14</uncertainty>
                  </item>
                  <item type="Uncertainty" >
                   <precision type="int" >5</precision>
                   <uncertainty type="int" >17</uncertainty>
                  </item>
                  <item type="Uncertainty" >
                   <precision type="int" >5</precision>
                   <uncertainty type="int" >10</uncertainty>
                  </item>
                 </value>
                </uncertainty>
                <adps type="Handle" >
                 <serial_number type="int" >316</serial_number>
                 <value type="AtomicDisplacementParameters" >
                  <uvalues type="Container" >
                   <count type="int" >6</count>
                   <item type="UncertainValue" >
                    <value type="float" >0.024500000000000001</value>
                    <uncertainty type="Uncertainty" >
                     <precision type="int" >4</precision>
                     <uncertainty type="int" >9</uncertainty>
                    </uncertainty>
                   </item>
                   <item type="UncertainValue" >
                    <value type="float" >0.0144</value>
                    <uncertainty type="Uncertainty" >
                     <precision type="int" >4</precision>
                     <uncertainty type="int" >8</uncertainty>
                    </uncertainty>
                   </item>
                   <item type="UncertainValue" >
                    <value type="float" >0.023800000000000002</value>
                    <uncertainty type="Uncertainty" >
                     <precision type="int" >4</precision>
                     <uncertainty type="int" >9</uncertainty>
                    </uncertainty>
                   </item>
                   <item type="UncertainValue" >
                    <value type="float" >0.0027000000000000001</value>
                    <uncertainty type="Uncertainty" >
                     <precision type="int" >4</precision>
                     <uncertainty type="int" >7</uncertainty>
                    </uncertainty>
                   </item>
                   <item type="UncertainValue" >
                    <value type="float" >0.0103</value>
                    <uncertainty type="Uncertainty" >
                     <precision type="int" >4</precision>
                     <uncertainty type="int" >7</uncertainty>
                    </uncertainty>
                   </item>
                   <item type="UncertainValue" >
                    <value type="float" >0.00080000000000000004</value>
                    <uncertainty type="Uncertainty" >
                     <precision type="int" >4</precision>
                     <uncertainty type="int" >7</uncertainty>
                    </uncertainty>
                   </item>
                  </uvalues>
                  <type type="AtomicDisplacementParameters::Type" >
                   <enumerator type="int" >0</enumerator>
                  </type>
                  <u_equivalent type="float" >0.020214582942049888</u_equivalent>
                 </value>
                </adps>
               </value>
              </site>
              <annotations type="Annotations" >
               <annotations type="Container" >
                <count type="int" >1</count>
                <item type="Handle" >
                 <serial_number type="int" >317</serial_number>
                 <value type="FileOrdering" >
                  <value type="Handle" >
                   <serial_number type="int" >318</serial_number>
                   <value type="FileOrdering" >
                    <file_order type="int" >51</file_order>
                   </value>
                  </value>
                 </value>
                </item>
               </annotations>
              </annotations>
             </value>
            </item>
            <item type="Handle" >
             <serial_number type="int" >319</serial_number>
             <value type="Atom3d" >
              <element type="Element" >
               <code type="char" >1</code>
              </element>
              <formal_charge type="int" >0</formal_charge>
              <radius type="float" >0.68000000000000005</radius>
              <label type="string" >C28</label>
              <site type="Handle" >
               <serial_number type="int" >320</serial_number>
               <value type="Site" >
                <orthogonal type="Point" >
                 <coordinates type="Vector" >
                  <vector type="Container" >
                   <count type="int" >3</count>
                   <item type="float" >5.1620239239431198</item>
                   <item type="float" >4.9337343699999998</item>
                   <item type="float" >-0.52548784758020706</item>
                  </vector>
                 </coordinates>
                </orthogonal>
                <fractional type="Point" >
                 <coordinates type="Vector" >
                  <vector type="Container" >
                   <count type="int" >3</count>
                   <item type="float" >0.36014000000000002</item>
                   <item type="float" >0.48830000000000001</item>
                   <item type="float" >-0.029350000000000001</item>
                  </vector>
                 </coordinates>
                </fractional>
                <uncertain_value type="UncertainValue" >
                 <value type="float" >1</value>
                 <uncertainty type="Uncertainty" >
                  <precision type="int" >0</precision>
                  <uncertainty type="int" >0</uncertainty>
                 </uncertainty>
                </uncertain_value>
                <uncertainty type="Handle" >
                 <serial_number type="int" >321</serial_number>
                 <value type="Container" >
                  <count type="int" >3</count>
                  <item type="Uncertainty" >
                   <precision type="int" >5</precision>
                   <uncertainty type="int" >14</uncertainty>
                  </item>
                  <item type="Uncertainty" >
                   <precision type="int" >5</precision>
                   <uncertainty type="int" >18</uncertainty>
                  </item>
                  <item type="Uncertainty" >
                   <precision type="int" >5</precision>
                   <uncertainty type="int" >11</uncertainty>
                  </item>
                 </value>
                </uncertainty>
                <adps type="Handle" >
                 <serial_number type="int" >322</serial_number>
                 <value type="AtomicDisplacementParameters" >
                  <uvalues type="Container" >
                   <count type="int" >6</count>
                   <item type="UncertainValue" >
                    <value type="float" >0.023699999999999999</value>
                    <uncertainty type="Uncertainty" >
                     <precision type="int" >4</precision>
                     <uncertainty type="int" >9</uncertainty>
                    </uncertainty>
                   </item>
                   <item type="UncertainValue" >
                    <value type="float" >0.018499999999999999</value>
                    <uncertainty type="Uncertainty" >
                     <precision type="int" >4</precision>
                     <uncertainty type="int" >9</uncertainty>
                    </uncertainty>
                   </item>
                   <item type="UncertainValue" >
                    <value type="float" >0.028799999999999999</value>
                    <uncertainty type="Uncertainty" >
                     <precision type="int" >4</precision>
                     <uncertainty type="int" >10</uncertainty>
                    </uncertainty>
                   </item>
                   <item type="UncertainValue" >
                    <value type="float" >0.0033</value>
                    <uncertainty type="Uncertainty" >
                     <precision type="int" >4</precision>
                     <uncertainty type="int" >7</uncertainty>
                    </uncertainty>
                   </item>
                   <item type="UncertainValue" >
                    <value type="float" >0.0106</value>
                    <uncertainty type="Uncertainty" >
                     <precision type="int" >4</precision>
                     <uncertainty type="int" >8</uncertainty>
                    </uncertainty>
                   </item>
                   <item type="UncertainValue" >
                    <value type="float" >0.0023</value>
                    <uncertainty type="Uncertainty" >
                     <precision type="int" >4</precision>
                     <uncertainty type="int" >7</uncertainty>
                    </uncertainty>
                   </item>
                  </uvalues>
                  <type type="AtomicDisplacementParameters::Type" >
                   <enumerator type="int" >0</enumerator>
                  </type>
                  <u_equivalent type="float" >0.023049678447233518</u_equivalent>
                 </value>
                </adps>
               </value>
              </site>
              <annotations type="Annotations" >
               <annotations type="Container" >
                <count type="int" >1</count>
                <item type="Handle" >
                 <serial_number type="int" >323</serial_number>
                 <value type="FileOrdering" >
                  <value type="Handle" >
                   <serial_number type="int" >324</serial_number>
                   <value type="FileOrdering" >
                    <file_order type="int" >52</file_order>
                   </value>
                  </value>
                 </value>
                </item>
               </annotations>
              </annotations>
             </value>
            </item>
            <item type="Handle" >
             <serial_number type="int" >325</serial_number>
             <value type="Atom3d" >
              <element type="Element" >
               <code type="char" >32</code>
              </element>
              <formal_charge type="int" >0</formal_charge>
              <radius type="float" >0.64000000000000001</radius>
              <label type="string" >F1</label>
              <site type="Handle" >
               <serial_number type="int" >326</serial_number>
               <value type="Site" >
                <orthogonal type="Point" >
                 <coordinates type="Vector" >
                  <vector type="Container" >
                   <count type="int" >3</count>
                   <item type="float" >9.6876264713302884</item>
                   <item type="float" >5.3215220519999997</item>
                   <item type="float" >2.6578763534337901</item>
                  </vector>
                 </coordinates>
                </orthogonal>
                <fractional type="Point" >
                 <coordinates type="Vector" >
                  <vector type="Container" >
                   <count type="int" >3</count>
                   <item type="float" >0.75675000000000003</item>
                   <item type="float" >0.52668000000000004</item>
                   <item type="float" >0.14845</item>
                  </vector>
                 </coordinates>
                </fractional>
                <uncertain_value type="UncertainValue" >
                 <value type="float" >1</value>
                 <uncertainty type="Uncertainty" >
                  <precision type="int" >0</precision>
                  <uncertainty type="int" >0</uncertainty>
                 </uncertainty>
                </uncertain_value>
                <uncertainty type="Handle" >
                 <serial_number type="int" >327</serial_number>
                 <value type="Container" >
                  <count type="int" >3</count>
                  <item type="Uncertainty" >
                   <precision type="int" >5</precision>
                   <uncertainty type="int" >9</uncertainty>
                  </item>
                  <item type="Uncertainty" >
                   <precision type="int" >5</precision>
                   <uncertainty type="int" >12</uncertainty>
                  </item>
                  <item type="Uncertainty" >
                   <precision type="int" >5</precision>
                   <uncertainty type="int" >7</uncertainty>
                  </item>
                 </value>
                </uncertainty>
                <adps type="Handle" >
                 <serial_number type="int" >328</serial_number>
                 <value type="AtomicDisplacementParameters" >
                  <uvalues type="Container" >
                   <count type="int" >6</count>
                   <item type="UncertainValue" >
                    <value type="float" >0.0286</value>
                    <uncertainty type="Uncertainty" >
                     <precision type="int" >4</precision>
                     <uncertainty type="int" >6</uncertainty>
                    </uncertainty>
                   </item>
                   <item type="UncertainValue" >
                    <value type="float" >0.0304</value>
                    <uncertainty type="Uncertainty" >
                     <precision type="int" >4</precision>
                     <uncertainty type="int" >6</uncertainty>
                    </uncertainty>
                   </item>
                   <item type="UncertainValue" >
                    <value type="float" >0.036200000000000003</value>
                    <uncertainty type="Uncertainty" >
                     <precision type="int" >4</precision>
                     <uncertainty type="int" >7</uncertainty>
                    </uncertainty>
                   </item>
                   <item type="UncertainValue" >
                    <value type="float" >0.0033999999999999998</value>
                    <uncertainty type="Uncertainty" >
                     <precision type="int" >4</precision>
                     <uncertainty type="int" >5</uncertainty>
                    </uncertainty>
                   </item>
                   <item type="UncertainValue" >
                    <value type="float" >-0.0050000000000000001</value>
                    <uncertainty type="Uncertainty" >
                     <precision type="int" >4</precision>
                     <uncertainty type="int" >5</uncertainty>
                    </uncertainty>
                   </item>
                   <item type="UncertainValue" >
                    <value type="float" >-0.002</value>
                    <uncertainty type="Uncertainty" >
                     <precision type="int" >4</precision>
                     <uncertainty type="int" >5</uncertainty>
                    </uncertainty>
                   </item>
                  </uvalues>
                  <type type="AtomicDisplacementParameters::Type" >
                   <enumerator type="int" >0</enumerator>
                  </type>
                  <u_equivalent type="float" >0.034858671334901496</u_equivalent>
                 </value>
                </adps>
               </value>
              </site>
              <annotations type="Annotations" >
               <annotations type="Container" >
                <count type="int" >1</count>
                <item type="Handle" >
                 <serial_number type="int" >329</serial_number>
                 <value type="FileOrdering" >
                  <value type="Handle" >
                   <serial_number type="int" >330</serial_number>
                   <value type="FileOrdering" >
                    <file_order type="int" >53</file_order>
                   </value>
                  </value>
                 </value>
                </item>
               </annotations>
              </annotations>
             </value>
            </item>
            <item type="Handle" >
             <serial_number type="int" >331</serial_number>
             <value type="Atom3d" >
              <element type="Element" >
               <code type="char" >32</code>
              </element>
              <formal_charge type="int" >0</formal_charge>
              <radius type="float" >0.64000000000000001</radius>
              <label type="string" >F2</label>
              <site type="Handle" >
               <serial_number type="int" >332</serial_number>
               <value type="Site" >
                <orthogonal type="Point" >
                 <coordinates type="Vector" >
                  <vector type="Container" >
                   <count type="int" >3</count>
                   <item type="float" >7.2610977450984908</item>
                   <item type="float" >5.3031329539999996</item>
                   <item type="float" >3.8152029111027708</item>
                  </vector>
                 </coordinates>
                </orthogonal>
                <fractional type="Point" >
                 <coordinates type="Vector" >
                  <vector type="Container" >
                   <count type="int" >3</count>
                   <item type="float" >0.60765999999999998</item>
                   <item type="float" >0.52485999999999999</item>
                   <item type="float" >0.21309</item>
                  </vector>
                 </coordinates>
                </fractional>
                <uncertain_value type="UncertainValue" >
                 <value type="float" >1</value>
                 <uncertainty type="Uncertainty" >
                  <precision type="int" >0</precision>
                  <uncertainty type="int" >0</uncertainty>
                 </uncertainty>
                </uncertain_value>
                <uncertainty type="Handle" >
                 <serial_number type="int" >333</serial_number>
                 <value type="Container" >
                  <count type="int" >3</count>
                  <item type="Uncertainty" >
                   <precision type="int" >5</precision>
                   <uncertainty type="int" >10</uncertainty>
                  </item>
                  <item type="Uncertainty" >
                   <precision type="int" >5</precision>
                   <uncertainty type="int" >12</uncertainty>
                  </item>
                  <item type="Uncertainty" >
                   <precision type="int" >5</precision>
                   <uncertainty type="int" >6</uncertainty>
                  </item>
                 </value>
                </uncertainty>
                <adps type="Handle" >
                 <serial_number type="int" >334</serial_number>
                 <value type="AtomicDisplacementParameters" >
                  <uvalues type="Container" >
                   <count type="int" >6</count>
                   <item type="UncertainValue" >
                    <value type="float" >0.052499999999999998</value>
                    <uncertainty type="Uncertainty" >
                     <precision type="int" >4</precision>
                     <uncertainty type="int" >8</uncertainty>
                    </uncertainty>
                   </item>
                   <item type="UncertainValue" >
                    <value type="float" >0.032800000000000003</value>
                    <uncertainty type="Uncertainty" >
                     <precision type="int" >4</precision>
                     <uncertainty type="int" >7</uncertainty>
                    </uncertainty>
                   </item>
                   <item type="UncertainValue" >
                    <value type="float" >0.017500000000000002</value>
                    <uncertainty type="Uncertainty" >
                     <precision type="int" >4</precision>
                     <uncertainty type="int" >6</uncertainty>
                    </uncertainty>
                   </item>
                   <item type="UncertainValue" >
                    <value type="float" >0.0089999999999999993</value>
                    <uncertainty type="Uncertainty" >
                     <precision type="int" >4</precision>
                     <uncertainty type="int" >6</uncertainty>
                    </uncertainty>
                   </item>
                   <item type="UncertainValue" >
                    <value type="float" >0.0044999999999999997</value>
                    <uncertainty type="Uncertainty" >
                     <precision type="int" >4</precision>
                     <uncertainty type="int" >5</uncertainty>
                    </uncertainty>
                   </item>
                   <item type="UncertainValue" >
                    <value type="float" >-0.00069999999999999999</value>
                    <uncertainty type="Uncertainty" >
                     <precision type="int" >4</precision>
                     <uncertainty type="int" >5</uncertainty>
                    </uncertainty>
                   </item>
                  </uvalues>
                  <type type="AtomicDisplacementParameters::Type" >
                   <enumerator type="int" >0</enumerator>
                  </type>
                  <u_equivalent type="float" >0.035514618016710693</u_equivalent>
                 </value>
                </adps>
               </value>
              </site>
              <annotations type="Annotations" >
               <annotations type="Container" >
                <count type="int" >1</count>
                <item type="Handle" >
                 <serial_number type="int" >335</serial_number>
                 <value type="FileOrdering" >
                  <value type="Handle" >
                   <serial_number type="int" >336</serial_number>
                   <value type="FileOrdering" >
                    <file_order type="int" >54</file_order>
                   </value>
                  </value>
                 </value>
                </item>
               </annotations>
              </annotations>
             </value>
            </item>
            <item type="Handle" >
             <serial_number type="int" >337</serial_number>
             <value type="Atom3d" >
              <element type="Element" >
               <code type="char" >32</code>
              </element>
              <formal_charge type="int" >0</formal_charge>
              <radius type="float" >0.64000000000000001</radius>
              <label type="string" >F3</label>
              <site type="Handle" >
               <serial_number type="int" >338</serial_number>
               <value type="Site" >
                <orthogonal type="Point" >
                 <coordinates type="Vector" >
                  <vector type="Container" >
                   <count type="int" >3</count>
                   <item type="float" >5.0322717281331757</item>
                   <item type="float" >5.0737744240000007</item>
                   <item type="float" >2.3320201753772394</item>
                  </vector>
                 </coordinates>
                </orthogonal>
                <fractional type="Point" >
                 <coordinates type="Vector" >
                  <vector type="Container" >
                   <count type="int" >3</count>
                   <item type="float" >0.41421000000000002</item>
                   <item type="float" >0.50216000000000005</item>
                   <item type="float" >0.13025</item>
                  </vector>
                 </coordinates>
                </fractional>
                <uncertain_value type="UncertainValue" >
                 <value type="float" >1</value>
                 <uncertainty type="Uncertainty" >
                  <precision type="int" >0</precision>
                  <uncertainty type="int" >0</uncertainty>
                 </uncertainty>
                </uncertain_value>
                <uncertainty type="Handle" >
                 <serial_number type="int" >339</serial_number>
                 <value type="Container" >
                  <count type="int" >3</count>
                  <item type="Uncertainty" >
                   <precision type="int" >5</precision>
                   <uncertainty type="int" >10</uncertainty>
                  </item>
                  <item type="Uncertainty" >
                   <precision type="int" >5</precision>
                   <uncertainty type="int" >13</uncertainty>
                  </item>
                  <item type="Uncertainty" >
                   <precision type="int" >5</precision>
                   <uncertainty type="int" >7</uncertainty>
                  </item>
                 </value>
                </uncertainty>
                <adps type="Handle" >
                 <serial_number type="int" >340</serial_number>
                 <value type="AtomicDisplacementParameters" >
                  <uvalues type="Container" >
                   <count type="int" >6</count>
                   <item type="UncertainValue" >
                    <value type="float" >0.042900000000000001</value>
                    <uncertainty type="Uncertainty" >
                     <precision type="int" >4</precision>
                     <uncertainty type="int" >7</uncertainty>
                    </uncertainty>
                   </item>
                   <item type="UncertainValue" >
                    <value type="float" >0.039699999999999999</value>
                    <uncertainty type="Uncertainty" >
                     <precision type="int" >4</precision>
                     <uncertainty type="int" >7</uncertainty>
                    </uncertainty>
                   </item>
                   <item type="UncertainValue" >
                    <value type="float" >0.028500000000000001</value>
                    <uncertainty type="Uncertainty" >
                     <precision type="int" >4</precision>
                     <uncertainty type="int" >7</uncertainty>
                    </uncertainty>
                   </item>
                   <item type="UncertainValue" >
                    <value type="float" >0.0095999999999999992</value>
                    <uncertainty type="Uncertainty" >
                     <precision type="int" >4</precision>
                     <uncertainty type="int" >6</uncertainty>
                    </uncertainty>
                   </item>
                   <item type="UncertainValue" >
                    <value type="float" >0.0223</value>
                    <uncertainty type="Uncertainty" >
                     <precision type="int" >4</precision>
                     <uncertainty type="int" >6</uncertainty>
                    </uncertainty>
                   </item>
                   <item type="UncertainValue" >
                    <value type="float" >0.0043</value>
                    <uncertainty type="Uncertainty" >
                     <precision type="int" >4</precision>
                     <uncertainty type="int" >5</uncertainty>
                    </uncertainty>
                   </item>
                  </uvalues>
                  <type type="AtomicDisplacementParameters::Type" >
                   <enumerator type="int" >0</enumerator>
                  </type>
                  <u_equivalent type="float" >0.034499631229669481</u_equivalent>
                 </value>
                </adps>
               </value>
              </site>
              <annotations type="Annotations" >
               <annotations type="Container" >
                <count type="int" >1</count>
                <item type="Handle" >
                 <serial_number type="int" >341</serial_number>
                 <value type="FileOrdering" >
                  <value type="Handle" >
                   <serial_number type="int" >342</serial_number>
                   <value type="FileOrdering" >
                    <file_order type="int" >55</file_order>
                   </value>
                  </value>
                 </value>
                </item>
               </annotations>
              </annotations>
             </value>
            </item>
            <item type="Handle" >
             <serial_number type="int" >343</serial_number>
             <value type="Atom3d" >
              <element type="Element" >
               <code type="char" >32</code>
              </element>
              <formal_charge type="int" >0</formal_charge>
              <radius type="float" >0.64000000000000001</radius>
              <label type="string" >F4</label>
              <site type="Handle" >
               <serial_number type="int" >344</serial_number>
               <value type="Site" >
                <orthogonal type="Point" >
                 <coordinates type="Vector" >
                  <vector type="Container" >
                   <count type="int" >3</count>
                   <item type="float" >3.9278640119692394</item>
                   <item type="float" >4.9210034559999993</item>
                   <item type="float" >-0.00089520928037513988</item>
                  </vector>
                 </coordinates>
                </orthogonal>
                <fractional type="Point" >
                 <coordinates type="Vector" >
                  <vector type="Container" >
                   <count type="int" >3</count>
                   <item type="float" >0.28288999999999997</item>
                   <item type="float" >0.48703999999999997</item>
                   <item type="float" >-5.0000000000000002e-05</item>
                  </vector>
                 </coordinates>
                </fractional>
                <uncertain_value type="UncertainValue" >
                 <value type="float" >1</value>
                 <uncertainty type="Uncertainty" >
                  <precision type="int" >0</precision>
                  <uncertainty type="int" >0</uncertainty>
                 </uncertainty>
                </uncertain_value>
                <uncertainty type="Handle" >
                 <serial_number type="int" >345</serial_number>
                 <value type="Container" >
                  <count type="int" >3</count>
                  <item type="Uncertainty" >
                   <precision type="int" >5</precision>
                   <uncertainty type="int" >9</uncertainty>
                  </item>
                  <item type="Uncertainty" >
                   <precision type="int" >5</precision>
                   <uncertainty type="int" >13</uncertainty>
                  </item>
                  <item type="Uncertainty" >
                   <precision type="int" >5</precision>
                   <uncertainty type="int" >7</uncertainty>
                  </item>
                 </value>
                </uncertainty>
                <adps type="Handle" >
                 <serial_number type="int" >346</serial_number>
                 <value type="AtomicDisplacementParameters" >
                  <uvalues type="Container" >
                   <count type="int" >6</count>
                   <item type="UncertainValue" >
                    <value type="float" >0.026800000000000001</value>
                    <uncertainty type="Uncertainty" >
                     <precision type="int" >4</precision>
                     <uncertainty type="int" >6</uncertainty>
                    </uncertainty>
                   </item>
                   <item type="UncertainValue" >
                    <value type="float" >0.037199999999999997</value>
                    <uncertainty type="Uncertainty" >
                     <precision type="int" >4</precision>
                     <uncertainty type="int" >7</uncertainty>
                    </uncertainty>
                   </item>
                   <item type="UncertainValue" >
                    <value type="float" >0.041700000000000001</value>
                    <uncertainty type="Uncertainty" >
                     <precision type="int" >4</precision>
                     <uncertainty type="int" >7</uncertainty>
                    </uncertainty>
                   </item>
                   <item type="UncertainValue" >
                    <value type="float" >0.002</value>
                    <uncertainty type="Uncertainty" >
                     <precision type="int" >4</precision>
                     <uncertainty type="int" >5</uncertainty>
                    </uncertainty>
                   </item>
                   <item type="UncertainValue" >
                    <value type="float" >0.0166</value>
                    <uncertainty type="Uncertainty" >
                     <precision type="int" >4</precision>
                     <uncertainty type="int" >5</uncertainty>
                    </uncertainty>
                   </item>
                   <item type="UncertainValue" >
                    <value type="float" >0.0035000000000000001</value>
                    <uncertainty type="Uncertainty" >
                     <precision type="int" >4</precision>
                     <uncertainty type="int" >6</uncertainty>
                    </uncertainty>
                   </item>
                  </uvalues>
                  <type type="AtomicDisplacementParameters::Type" >
                   <enumerator type="int" >0</enumerator>
                  </type>
                  <u_equivalent type="float" >0.03383302523914164</u_equivalent>
                 </value>
                </adps>
               </value>
              </site>
              <annotations type="Annotations" >
               <annotations type="Container" >
                <count type="int" >1</count>
                <item type="Handle" >
                 <serial_number type="int" >347</serial_number>
                 <value type="FileOrdering" >
                  <value type="Handle" >
                   <serial_number type="int" >348</serial_number>
                   <value type="FileOrdering" >
                    <file_order type="int" >56</file_order>
                   </value>
                  </value>
                 </value>
                </item>
               </annotations>
              </annotations>
             </value>
            </item>
            <item type="Handle" >
             <serial_number type="int" >349</serial_number>
             <value type="Atom3d" >
              <element type="Element" >
               <code type="char" >1</code>
              </element>
              <formal_charge type="int" >0</formal_charge>
              <radius type="float" >0.68000000000000005</radius>
              <label type="string" >C24</label>
              <site type="Handle" >
               <serial_number type="int" >350</serial_number>
               <value type="Site" >
                <orthogonal type="Point" >
                 <coordinates type="Vector" >
                  <vector type="Container" >
                   <count type="int" >3</count>
                   <item type="float" >5.2815278815427806</item>
                   <item type="float" >4.8603800560000003</item>
                   <item type="float" >-1.875821526098068</item>
                  </vector>
                 </coordinates>
                </orthogonal>
                <fractional type="Point" >
                 <coordinates type="Vector" >
                  <vector type="Container" >
                   <count type="int" >3</count>
                   <item type="float" >0.33877999999999997</item>
                   <item type="float" >0.48104000000000002</item>
                   <item type="float" >-0.10477</item>
                  </vector>
                 </coordinates>
                </fractional>
                <uncertain_value type="UncertainValue" >
                 <value type="float" >1</value>
                 <uncertainty type="Uncertainty" >
                  <precision type="int" >0</precision>
                  <uncertainty type="int" >0</uncertainty>
                 </uncertainty>
                </uncertain_value>
                <uncertainty type="Handle" >
                 <serial_number type="int" >351</serial_number>
                 <value type="Container" >
                  <count type="int" >3</count>
                  <item type="Uncertainty" >
                   <precision type="int" >5</precision>
                   <uncertainty type="int" >15</uncertainty>
                  </item>
                  <item type="Uncertainty" >
                   <precision type="int" >5</precision>
                   <uncertainty type="int" >18</uncertainty>
                  </item>
                  <item type="Uncertainty" >
                   <precision type="int" >5</precision>
                   <uncertainty type="int" >11</uncertainty>
                  </item>
                 </value>
                </uncertainty>
                <adps type="Handle" >
                 <serial_number type="int" >352</serial_number>
                 <value type="AtomicDisplacementParameters" >
                  <uvalues type="Container" >
                   <count type="int" >6</count>
                   <item type="UncertainValue" >
                    <value type="float" >0.0269</value>
                    <uncertainty type="Uncertainty" >
                     <precision type="int" >1000000</precision>
                     <uncertainty type="int" >0</uncertainty>
                    </uncertainty>
                   </item>
                   <item type="UncertainValue" >
                    <value type="float" >0.015599999999999999</value>
                    <uncertainty type="Uncertainty" >
                     <precision type="int" >1000000</precision>
                     <uncertainty type="int" >0</uncertainty>
                    </uncertainty>
                   </item>
                   <item type="UncertainValue" >
                    <value type="float" >0.028100000000000003</value>
                    <uncertainty type="Uncertainty" >
                     <precision type="int" >1000000</precision>
                     <uncertainty type="int" >0</uncertainty>
                    </uncertainty>
                   </item>
                   <item type="UncertainValue" >
                    <value type="float" >0.0025000000000000005</value>
                    <uncertainty type="Uncertainty" >
                     <precision type="int" >1000000</precision>
                     <uncertainty type="int" >0</uncertainty>
                    </uncertainty>
                   </item>
                   <item type="UncertainValue" >
                    <value type="float" >0.00050000000000000012</value>
                    <uncertainty type="Uncertainty" >
                     <precision type="int" >1000000</precision>
                     <uncertainty type="int" >0</uncertainty>
                    </uncertainty>
                   </item>
                   <item type="UncertainValue" >
                    <value type="float" >-0.00030000000000000003</value>
                    <uncertainty type="Uncertainty" >
                     <precision type="int" >1000000</precision>
                     <uncertainty type="int" >0</uncertainty>
                    </uncertainty>
                   </item>
                  </uvalues>
                  <type type="AtomicDisplacementParameters::Type" >
                   <enumerator type="int" >0</enumerator>
                  </type>
                  <u_equivalent type="float" >0.025166367264656223</u_equivalent>
                 </value>
                </adps>
               </value>
              </site>
              <annotations type="Annotations" >
               <annotations type="Container" >
                <count type="int" >1</count>
                <item type="Handle" >
                 <serial_number type="int" >353</serial_number>
                 <value type="FileOrdering" >
                  <value type="Handle" >
                   <serial_number type="int" >354</serial_number>
                   <value type="FileOrdering" >
                    <file_order type="int" >48</file_order>
                   </value>
                  </value>
                 </value>
                </item>
               </annotations>
              </annotations>
             </value>
            </item>
            <item type="Handle" >
             <serial_number type="int" >355</serial_number>
             <value type="Atom3d" >
              <element type="Element" >
               <code type="char" >1</code>
              </element>
              <formal_charge type="int" >0</formal_charge>
              <radius type="float" >0.68000000000000005</radius>
              <label type="string" >C25</label>
              <site type="Handle" >
               <serial_number type="int" >356</serial_number>
               <value type="Site" >
                <orthogonal type="Point" >
                 <coordinates type="Vector" >
                  <vector type="Container" >
                   <count type="int" >3</count>
                   <item type="float" >6.5416535467912107</item>
                   <item type="float" >4.8889740929999999</item>
                   <item type="float" >-2.4797297066391377</item>
                  </vector>
                 </coordinates>
                </orthogonal>
                <fractional type="Point" >
                 <coordinates type="Vector" >
                  <vector type="Container" >
                   <count type="int" >3</count>
                   <item type="float" >0.41613999999999995</item>
                   <item type="float" >0.48387000000000002</item>
                   <item type="float" >-0.13850000000000001</item>
                  </vector>
                 </coordinates>
                </fractional>
                <uncertain_value type="UncertainValue" >
                 <value type="float" >1</value>
                 <uncertainty type="Uncertainty" >
                  <precision type="int" >0</precision>
                  <uncertainty type="int" >0</uncertainty>
                 </uncertainty>
                </uncertain_value>
                <uncertainty type="Handle" >
                 <serial_number type="int" >357</serial_number>
                 <value type="Container" >
                  <count type="int" >3</count>
                  <item type="Uncertainty" >
                   <precision type="int" >5</precision>
                   <uncertainty type="int" >16</uncertainty>
                  </item>
                  <item type="Uncertainty" >
                   <precision type="int" >5</precision>
                   <uncertainty type="int" >19</uncertainty>
                  </item>
                  <item type="Uncertainty" >
                   <precision type="int" >5</precision>
                   <uncertainty type="int" >11</uncertainty>
                  </item>
                 </value>
                </uncertainty>
                <adps type="Handle" >
                 <serial_number type="int" >358</serial_number>
                 <value type="AtomicDisplacementParameters" >
                  <uvalues type="Container" >
                   <count type="int" >6</count>
                   <item type="UncertainValue" >
                    <value type="float" >0.038899999999999997</value>
                    <uncertainty type="Uncertainty" >
                     <precision type="int" >1000000</precision>
                     <uncertainty type="int" >0</uncertainty>
                    </uncertainty>
                   </item>
                   <item type="UncertainValue" >
                    <value type="float" >0.019200000000000002</value>
                    <uncertainty type="Uncertainty" >
                     <precision type="int" >1000000</precision>
                     <uncertainty type="int" >0</uncertainty>
                    </uncertainty>
                   </item>
                   <item type="UncertainValue" >
                    <value type="float" >0.0178</value>
                    <uncertainty type="Uncertainty" >
                     <precision type="int" >1000000</precision>
                     <uncertainty type="int" >0</uncertainty>
                    </uncertainty>
                   </item>
                   <item type="UncertainValue" >
                    <value type="float" >0.0058999999999999999</value>
                    <uncertainty type="Uncertainty" >
                     <precision type="int" >1000000</precision>
                     <uncertainty type="int" >0</uncertainty>
                    </uncertainty>
                   </item>
                   <item type="UncertainValue" >
                    <value type="float" >0.0051000000000000004</value>
                    <uncertainty type="Uncertainty" >
                     <precision type="int" >1000000</precision>
                     <uncertainty type="int" >0</uncertainty>
                    </uncertainty>
                   </item>
                   <item type="UncertainValue" >
                    <value type="float" >-0.0012000000000000001</value>
                    <uncertainty type="Uncertainty" >
                     <precision type="int" >1000000</precision>
                     <uncertainty type="int" >0</uncertainty>
                    </uncertainty>
                   </item>
                  </uvalues>
                  <type type="AtomicDisplacementParameters::Type" >
                   <enumerator type="int" >0</enumerator>
                  </type>
                  <u_equivalent type="float" >0.025998100832980531</u_equivalent>
                 </value>
                </adps>
               </value>
              </site>
              <annotations type="Annotations" >
               <annotations type="Container" >
                <count type="int" >1</count>
                <item type="Handle" >
                 <serial_number type="int" >359</serial_number>
                 <value type="FileOrdering" >
                  <value type="Handle" >
                   <serial_number type="int" >360</serial_number>
                   <value type="FileOrdering" >
                    <file_order type="int" >49</file_order>
                   </value>
                  </value>
                 </value>
                </item>
               </annotations>
              </annotations>
             </value>
            </item>
            <item type="Handle" >
             <serial_number type="int" >361</serial_number>
             <value type="Atom3d" >
              <element type="Element" >
               <code type="char" >1</code>
              </element>
              <formal_charge type="int" >0</formal_charge>
              <radius type="float" >0.68000000000000005</radius>
              <label type="string" >C26</label>
              <site type="Handle" >
               <serial_number type="int" >362</serial_number>
               <value type="Site" >
                <orthogonal type="Point" >
                 <coordinates type="Vector" >
                  <vector type="Container" >
                   <count type="int" >3</count>
                   <item type="float" >7.6579759428583332</item>
                   <item type="float" >5.0037543969999989</item>
                   <item type="float" >-1.7211293624492436</item>
                  </vector>
                 </coordinates>
                </orthogonal>
                <fractional type="Point" >
                 <coordinates type="Vector" >
                  <vector type="Container" >
                   <count type="int" >3</count>
                   <item type="float" >0.51337999999999995</item>
                   <item type="float" >0.49522999999999995</item>
                   <item type="float" >-0.096129999999999993</item>
                  </vector>
                 </coordinates>
                </fractional>
                <uncertain_value type="UncertainValue" >
                 <value type="float" >1</value>
                 <uncertainty type="Uncertainty" >
                  <precision type="int" >0</precision>
                  <uncertainty type="int" >0</uncertainty>
                 </uncertainty>
                </uncertain_value>
                <uncertainty type="Handle" >
                 <serial_number type="int" >363</serial_number>
                 <value type="Container" >
                  <count type="int" >3</count>
                  <item type="Uncertainty" >
                   <precision type="int" >5</precision>
                   <uncertainty type="int" >15</uncertainty>
                  </item>
                  <item type="Uncertainty" >
                   <precision type="int" >5</precision>
                   <uncertainty type="int" >18</uncertainty>
                  </item>
                  <item type="Uncertainty" >
                   <precision type="int" >5</precision>
                   <uncertainty type="int" >11</uncertainty>
                  </item>
                 </value>
                </uncertainty>
                <adps type="Handle" >
                 <serial_number type="int" >364</serial_number>
                 <value type="AtomicDisplacementParameters" >
                  <uvalues type="Container" >
                   <count type="int" >6</count>
                   <item type="UncertainValue" >
                    <value type="float" >0.032800000000000003</value>
                    <uncertainty type="Uncertainty" >
                     <precision type="int" >1000000</precision>
                     <uncertainty type="int" >0</uncertainty>
                    </uncertainty>
                   </item>
                   <item type="UncertainValue" >
                    <value type="float" >0.0184</value>
                    <uncertainty type="Uncertainty" >
                     <precision type="int" >1000000</precision>
                     <uncertainty type="int" >0</uncertainty>
                    </uncertainty>
                   </item>
                   <item type="UncertainValue" >
                    <value type="float" >0.021999999999999999</value>
                    <uncertainty type="Uncertainty" >
                     <precision type="int" >1000000</precision>
                     <uncertainty type="int" >0</uncertainty>
                    </uncertainty>
                   </item>
                   <item type="UncertainValue" >
                    <value type="float" >0.0057000000000000002</value>
                    <uncertainty type="Uncertainty" >
                     <precision type="int" >1000000</precision>
                     <uncertainty type="int" >0</uncertainty>
                    </uncertainty>
                   </item>
                   <item type="UncertainValue" >
                    <value type="float" >0.0124</value>
                    <uncertainty type="Uncertainty" >
                     <precision type="int" >1000000</precision>
                     <uncertainty type="int" >0</uncertainty>
                    </uncertainty>
                   </item>
                   <item type="UncertainValue" >
                    <value type="float" >0.0020000000000000005</value>
                    <uncertainty type="Uncertainty" >
                     <precision type="int" >1000000</precision>
                     <uncertainty type="int" >0</uncertainty>
                    </uncertainty>
                   </item>
                  </uvalues>
                  <type type="AtomicDisplacementParameters::Type" >
                   <enumerator type="int" >0</enumerator>
                  </type>
                  <u_equivalent type="float" >0.023468901970893043</u_equivalent>
                 </value>
                </adps>
               </value>
              </site>
              <annotations type="Annotations" >
               <annotations type="Container" >
                <count type="int" >1</count>
                <item type="Handle" >
                 <serial_number type="int" >365</serial_number>
                 <value type="FileOrdering" >
                  <value type="Handle" >
                   <serial_number type="int" >366</serial_number>
                   <value type="FileOrdering" >
                    <file_order type="int" >50</file_order>
                   </value>
                  </value>
                 </value>
                </item>
               </annotations>
              </annotations>
             </value>
            </item>
            <item type="Handle" >
             <serial_number type="int" >367</serial_number>
             <value type="Atom3d" >
              <element type="Element" >
               <code type="char" >1</code>
              </element>
              <formal_charge type="int" >0</formal_charge>
              <radius type="float" >0.68000000000000005</radius>
              <label type="string" >C27</label>
              <site type="Handle" >
               <serial_number type="int" >368</serial_number>
               <value type="Site" >
                <orthogonal type="Point" >
                 <coordinates type="Vector" >
                  <vector type="Container" >
                   <count type="int" >3</count>
                   <item type="float" >7.5875521633565928</item>
                   <item type="float" >5.0734713069999993</item>
                   <item type="float" >-0.30974241100979838</item>
                  </vector>
                 </coordinates>
                </orthogonal>
                <fractional type="Point" >
                 <coordinates type="Vector" >
                  <vector type="Container" >
                   <count type="int" >3</count>
                   <item type="float" >0.53963000000000005</item>
                   <item type="float" >0.50212999999999997</item>
                   <item type="float" >-0.017299999999999999</item>
                  </vector>
                 </coordinates>
                </fractional>
                <uncertain_value type="UncertainValue" >
                 <value type="float" >1</value>
                 <uncertainty type="Uncertainty" >
                  <precision type="int" >0</precision>
                  <uncertainty type="int" >0</uncertainty>
                 </uncertainty>
                </uncertain_value>
                <uncertainty type="Handle" >
                 <serial_number type="int" >369</serial_number>
                 <value type="Container" >
                  <count type="int" >3</count>
                  <item type="Uncertainty" >
                   <precision type="int" >5</precision>
                   <uncertainty type="int" >14</uncertainty>
                  </item>
                  <item type="Uncertainty" >
                   <precision type="int" >5</precision>
                   <uncertainty type="int" >17</uncertainty>
                  </item>
                  <item type="Uncertainty" >
                   <precision type="int" >5</precision>
                   <uncertainty type="int" >10</uncertainty>
                  </item>
                 </value>
                </uncertainty>
                <adps type="Handle" >
                 <serial_number type="int" >370</serial_number>
                 <value type="AtomicDisplacementParameters" >
                  <uvalues type="Container" >
                   <count type="int" >6</count>
                   <item type="UncertainValue" >
                    <value type="float" >0.024500000000000001</value>
                    <uncertainty type="Uncertainty" >
                     <precision type="int" >1000000</precision>
                     <uncertainty type="int" >0</uncertainty>
                    </uncertainty>
                   </item>
                   <item type="UncertainValue" >
                    <value type="float" >0.0144</value>
                    <uncertainty type="Uncertainty" >
                     <precision type="int" >1000000</precision>
                     <uncertainty type="int" >0</uncertainty>
                    </uncertainty>
                   </item>
                   <item type="UncertainValue" >
                    <value type="float" >0.023800000000000009</value>
                    <uncertainty type="Uncertainty" >
                     <precision type="int" >1000000</precision>
                     <uncertainty type="int" >0</uncertainty>
                    </uncertainty>
                   </item>
                   <item type="UncertainValue" >
                    <value type="float" >0.0027000000000000001</value>
                    <uncertainty type="Uncertainty" >
                     <precision type="int" >1000000</precision>
                     <uncertainty type="int" >0</uncertainty>
                    </uncertainty>
                   </item>
                   <item type="UncertainValue" >
                    <value type="float" >0.010300000000000002</value>
                    <uncertainty type="Uncertainty" >
                     <precision type="int" >1000000</precision>
                     <uncertainty type="int" >0</uncertainty>
                    </uncertainty>
                   </item>
                   <item type="UncertainValue" >
                    <value type="float" >0.00080000000000000015</value>
                    <uncertainty type="Uncertainty" >
                     <precision type="int" >1000000</precision>
                     <uncertainty type="int" >0</uncertainty>
                    </uncertainty>
                   </item>
                  </uvalues>
                  <type type="AtomicDisplacementParameters::Type" >
                   <enumerator type="int" >0</enumerator>
                  </type>
                  <u_equivalent type="float" >0.020214582942049888</u_equivalent>
                 </value>
                </adps>
               </value>
              </site>
              <annotations type="Annotations" >
               <annotations type="Container" >
                <count type="int" >1</count>
                <item type="Handle" >
                 <serial_number type="int" >371</serial_number>
                 <value type="FileOrdering" >
                  <value type="Handle" >
                   <serial_number type="int" >372</serial_number>
                   <value type="FileOrdering" >
                    <file_order type="int" >51</file_order>
                   </value>
                  </value>
                 </value>
                </item>
               </annotations>
              </annotations>
             </value>
            </item>
            <item type="Handle" >
             <serial_number type="int" >373</serial_number>
             <value type="Atom3d" >
              <element type="Element" >
               <code type="char" >1</code>
              </element>
              <formal_charge type="int" >0</formal_charge>
              <radius type="float" >0.68000000000000005</radius>
              <label type="string" >C28</label>
              <site type="Handle" >
               <serial_number type="int" >374</serial_number>
               <value type="Site" >
                <orthogonal type="Point" >
                 <coordinates type="Vector" >
                  <vector type="Container" >
                   <count type="int" >3</count>
                   <item type="float" >8.7217760760568801</item>
                   <item type="float" >5.1701656300000005</item>
                   <item type="float" >0.52548784758020706</item>
                  </vector>
                 </coordinates>
                </orthogonal>
                <fractional type="Point" >
                 <coordinates type="Vector" >
                  <vector type="Container" >
                   <count type="int" >3</count>
                   <item type="float" >0.63985999999999998</item>
                   <item type="float" >0.51170000000000004</item>
                   <item type="float" >0.029350000000000001</item>
                  </vector>
                 </coordinates>
                </fractional>
                <uncertain_value type="UncertainValue" >
                 <value type="float" >1</value>
                 <uncertainty type="Uncertainty" >
                  <precision type="int" >0</precision>
                  <uncertainty type="int" >0</uncertainty>
                 </uncertainty>
                </uncertain_value>
                <uncertainty type="Handle" >
                 <serial_number type="int" >375</serial_number>
                 <value type="Container" >
                  <count type="int" >3</count>
                  <item type="Uncertainty" >
                   <precision type="int" >5</precision>
                   <uncertainty type="int" >14</uncertainty>
                  </item>
                  <item type="Uncertainty" >
                   <precision type="int" >5</precision>
                   <uncertainty type="int" >18</uncertainty>
                  </item>
                  <item type="Uncertainty" >
                   <precision type="int" >5</precision>
                   <uncertainty type="int" >11</uncertainty>
                  </item>
                 </value>
                </uncertainty>
                <adps type="Handle" >
                 <serial_number type="int" >376</serial_number>
                 <value type="AtomicDisplacementParameters" >
                  <uvalues type="Container" >
                   <count type="int" >6</count>
                   <item type="UncertainValue" >
                    <value type="float" >0.023699999999999999</value>
                    <uncertainty type="Uncertainty" >
                     <precision type="int" >1000000</precision>
                     <uncertainty type="int" >0</uncertainty>
                    </uncertainty>
                   </item>
                   <item type="UncertainValue" >
                    <value type="float" >0.018500000000000003</value>
                    <uncertainty type="Uncertainty" >
                     <precision type="int" >1000000</precision>
                     <uncertainty type="int" >0</uncertainty>
                    </uncertainty>
                   </item>
                   <item type="UncertainValue" >
                    <value type="float" >0.028800000000000003</value>
                    <uncertainty type="Uncertainty" >
                     <precision type="int" >1000000</precision>
                     <uncertainty type="int" >0</uncertainty>
                    </uncertainty>
                   </item>
                   <item type="UncertainValue" >
                    <value type="float" >0.0033000000000000004</value>
                    <uncertainty type="Uncertainty" >
                     <precision type="int" >1000000</precision>
                     <uncertainty type="int" >0</uncertainty>
                    </uncertainty>
                   </item>
                   <item type="UncertainValue" >
                    <value type="float" >0.0106</value>
                    <uncertainty type="Uncertainty" >
                     <precision type="int" >1000000</precision>
                     <uncertainty type="int" >0</uncertainty>
                    </uncertainty>
                   </item>
                   <item type="UncertainValue" >
                    <value type="float" >0.0023000000000000004</value>
                    <uncertainty type="Uncertainty" >
                     <precision type="int" >1000000</precision>
                     <uncertainty type="int" >0</uncertainty>
                    </uncertainty>
                   </item>
                  </uvalues>
                  <type type="AtomicDisplacementParameters::Type" >
                   <enumerator type="int" >0</enumerator>
                  </type>
                  <u_equivalent type="float" >0.023049678447233518</u_equivalent>
                 </value>
                </adps>
               </value>
              </site>
              <annotations type="Annotations" >
               <annotations type="Container" >
                <count type="int" >1</count>
                <item type="Handle" >
                 <serial_number type="int" >377</serial_number>
                 <value type="FileOrdering" >
                  <value type="Handle" >
                   <serial_number type="int" >378</serial_number>
                   <value type="FileOrdering" >
                    <file_order type="int" >52</file_order>
                   </value>
                  </value>
                 </value>
                </item>
               </annotations>
              </annotations>
             </value>
            </item>
            <item type="Handle" >
             <serial_number type="int" >379</serial_number>
             <value type="Atom3d" >
              <element type="Element" >
               <code type="char" >32</code>
              </element>
              <formal_charge type="int" >0</formal_charge>
              <radius type="float" >0.64000000000000001</radius>
              <label type="string" >F1</label>
              <site type="Handle" >
               <serial_number type="int" >380</serial_number>
               <value type="Site" >
                <orthogonal type="Point" >
                 <coordinates type="Vector" >
                  <vector type="Container" >
                   <count type="int" >3</count>
                   <item type="float" >4.1961735286697133</item>
                   <item type="float" >4.7823779479999997</item>
                   <item type="float" >-2.6578763534337901</item>
                  </vector>
                 </coordinates>
                </orthogonal>
                <fractional type="Point" >
                 <coordinates type="Vector" >
                  <vector type="Container" >
                   <count type="int" >3</count>
                   <item type="float" >0.24324999999999997</item>
                   <item type="float" >0.47331999999999996</item>
                   <item type="float" >-0.14845</item>
                  </vector>
                 </coordinates>
                </fractional>
                <uncertain_value type="UncertainValue" >
                 <value type="float" >1</value>
                 <uncertainty type="Uncertainty" >
                  <precision type="int" >0</precision>
                  <uncertainty type="int" >0</uncertainty>
                 </uncertainty>
                </uncertain_value>
                <uncertainty type="Handle" >
                 <serial_number type="int" >381</serial_number>
                 <value type="Container" >
                  <count type="int" >3</count>
                  <item type="Uncertainty" >
                   <precision type="int" >5</precision>
                   <uncertainty type="int" >9</uncertainty>
                  </item>
                  <item type="Uncertainty" >
                   <precision type="int" >5</precision>
                   <uncertainty type="int" >12</uncertainty>
                  </item>
                  <item type="Uncertainty" >
                   <precision type="int" >5</precision>
                   <uncertainty type="int" >7</uncertainty>
                  </item>
                 </value>
                </uncertainty>
                <adps type="Handle" >
                 <serial_number type="int" >382</serial_number>
                 <value type="AtomicDisplacementParameters" >
                  <uvalues type="Container" >
                   <count type="int" >6</count>
                   <item type="UncertainValue" >
                    <value type="float" >0.0286</value>
                    <uncertainty type="Uncertainty" >
                     <precision type="int" >1000000</precision>
                     <uncertainty type="int" >0</uncertainty>
                    </uncertainty>
                   </item>
                   <item type="UncertainValue" >
                    <value type="float" >0.030400000000000007</value>
                    <uncertainty type="Uncertainty" >
                     <precision type="int" >1000000</precision>
                     <uncertainty type="int" >0</uncertainty>
                    </uncertainty>
                   </item>
                   <item type="UncertainValue" >
                    <value type="float" >0.036199999999999996</value>
                    <uncertainty type="Uncertainty" >
                     <precision type="int" >1000000</precision>
                     <uncertainty type="int" >0</uncertainty>
                    </uncertainty>
                   </item>
                   <item type="UncertainValue" >
                    <value type="float" >0.0034000000000000002</value>
                    <uncertainty type="Uncertainty" >
                     <precision type="int" >1000000</precision>
                     <uncertainty type="int" >0</uncertainty>
                    </uncertainty>
                   </item>
                   <item type="UncertainValue" >
                    <value type="float" >-0.0049999999999999992</value>
                    <uncertainty type="Uncertainty" >
                     <precision type="int" >1000000</precision>
                     <uncertainty type="int" >0</uncertainty>
                    </uncertainty>
                   </item>
                   <item type="UncertainValue" >
                    <value type="float" >-0.0020000000000000005</value>
                    <uncertainty type="Uncertainty" >
                     <precision type="int" >1000000</precision>
                     <uncertainty type="int" >0</uncertainty>
                    </uncertainty>
                   </item>
                  </uvalues>
                  <type type="AtomicDisplacementParameters::Type" >
                   <enumerator type="int" >0</enumerator>
                  </type>
                  <u_equivalent type="float" >0.034858671334901496</u_equivalent>
                 </value>
                </adps>
               </value>
              </site>
              <annotations type="Annotations" >
               <annotations type="Container" >
                <count type="int" >1</count>
                <item type="Handle" >
                 <serial_number type="int" >383</serial_number>
                 <value type="FileOrdering" >
                  <value type="Handle" >
                   <serial_number type="int" >384</serial_number>
                   <value type="FileOrdering" >
                    <file_order type="int" >53</file_order>
                   </value>
                  </value>
                 </value>
                </item>
               </annotations>
              </annotations>
             </value>
            </item>
            <item type="Handle" >
             <serial_number type="int" >385</serial_number>
             <value type="Atom3d" >
              <element type="Element" >
               <code type="char" >32</code>
              </element>
              <formal_charge type="int" >0</formal_charge>
              <radius type="float" >0.64000000000000001</radius>
              <label type="string" >F2</label>
              <site type="Handle" >
               <serial_number type="int" >386</serial_number>
               <value type="Site" >
                <orthogonal type="Point" >
                 <coordinates type="Vector" >
                  <vector type="Container" >
                   <count type="int" >3</count>
                   <item type="float" >6.62270225490151</item>
                   <item type="float" >4.8007670459999998</item>
                   <item type="float" >-3.8152029111027708</item>
                  </vector>
                 </coordinates>
                </orthogonal>
                <fractional type="Point" >
                 <coordinates type="Vector" >
                  <vector type="Container" >
                   <count type="int" >3</count>
                   <item type="float" >0.39234000000000002</item>
                   <item type="float" >0.47514000000000001</item>
                   <item type="float" >-0.21309</item>
                  </vector>
                 </coordinates>
                </fractional>
                <uncertain_value type="UncertainValue" >
                 <value type="float" >1</value>
                 <uncertainty type="Uncertainty" >
                  <precision type="int" >0</precision>
                  <uncertainty type="int" >0</uncertainty>
                 </uncertainty>
                </uncertain_value>
                <uncertainty type="Handle" >
                 <serial_number type="int" >387</serial_number>
                 <value type="Container" >
                  <count type="int" >3</count>
                  <item type="Uncertainty" >
                   <precision type="int" >5</precision>
                   <uncertainty type="int" >10</uncertainty>
                  </item>
                  <item type="Uncertainty" >
                   <precision type="int" >5</precision>
                   <uncertainty type="int" >12</uncertainty>
                  </item>
                  <item type="Uncertainty" >
                   <precision type="int" >5</precision>
                   <uncertainty type="int" >6</uncertainty>
                  </item>
                 </value>
                </uncertainty>
                <adps type="Handle" >
                 <serial_number type="int" >388</serial_number>
                 <value type="AtomicDisplacementParameters" >
                  <uvalues type="Container" >
                   <count type="int" >6</count>
                   <item type="UncertainValue" >
                    <value type="float" >0.052500000000000005</value>
                    <uncertainty type="Uncertainty" >
                     <precision type="int" >1000000</precision>
                     <uncertainty type="int" >0</uncertainty>
                    </uncertainty>
                   </item>
                   <item type="UncertainValue" >
                    <value type="float" >0.03280000000000001</value>
                    <uncertainty type="Uncertainty" >
                     <precision type="int" >1000000</precision>
                     <uncertainty type="int" >0</uncertainty>
                    </uncertainty>
                   </item>
                   <item type="UncertainValue" >
                    <value type="float" >0.017500000000000002</value>
                    <uncertainty type="Uncertainty" >
                     <precision type="int" >1000000</precision>
                     <uncertainty type="int" >0</uncertainty>
                    </uncertainty>
                   </item>
                   <item type="UncertainValue" >
                    <value type="float" >0.0089999999999999993</value>
                    <uncertainty type="Uncertainty" >
                     <precision type="int" >1000000</precision>
                     <uncertainty type="int" >0</uncertainty>
                    </uncertainty>
                   </item>
                   <item type="UncertainValue" >
                    <value type="float" >0.0045000000000000005</value>
                    <uncertainty type="Uncertainty" >
                     <precision type="int" >1000000</precision>
                     <uncertainty type="int" >0</uncertainty>
                    </uncertainty>
                   </item>
                   <item type="UncertainValue" >
                    <value type="float" >-0.00069999999999999999</value>
                    <uncertainty type="Uncertainty" >
                     <precision type="int" >1000000</precision>
                     <uncertainty type="int" >0</uncertainty>
                    </uncertainty>
                   </item>
                  </uvalues>
                  <type type="AtomicDisplacementParameters::Type" >
                   <enumerator type="int" >0</enumerator>
                  </type>
                  <u_equivalent type="float" >0.035514618016710693</u_equivalent>
                 </value>
                </adps>
               </value>
              </site>
              <annotations type="Annotations" >
               <annotations type="Container" >
                <count type="int" >1</count>
                <item type="Handle" >
                 <serial_number type="int" >389</serial_number>
                 <value type="FileOrdering" >
                  <value type="Handle" >
                   <serial_number type="int" >390</serial_number>
                   <value type="FileOrdering" >
                    <file_order type="int" >54</file_order>
                   </value>
                  </value>
                 </value>
                </item>
               </annotations>
              </annotations>
             </value>
            </item>
            <item type="Handle" >
             <serial_number type="int" >391</serial_number>
             <value type="Atom3d" >
              <element type="Element" >
               <code type="char" >32</code>
              </element>
              <formal_charge type="int" >0</formal_charge>
              <radius type="float" >0.64000000000000001</radius>
              <label type="string" >F3</label>
              <site type="Handle" >
               <serial_number type="int" >392</serial_number>
               <value type="Site" >
                <orthogonal type="Point" >
                 <coordinates type="Vector" >
                  <vector type="Container" >
                   <count type="int" >3</count>
                   <item type="float" >8.851528271866826</item>
                   <item type="float" >5.0301255759999988</item>
                   <item type="float" >-2.3320201753772394</item>
                  </vector>
                 </coordinates>
                </orthogonal>
                <fractional type="Point" >
[truncated: 77,824,732 more chars]
