# Supplementary material for: A co-crystal of 2-(1′-pyrenyl)-4,4,5,5-tetramethyl-4,5-dihydro-1H-imidazole-3-oxide-1-oxyl with octafluoronaphthalene
Source: Royal Society of Chemistry journal article supplement (doi:10.1039/c2ce26621k), 2012-12-06
Supplement: c2ce26621k.pdf [file c2ce26621k.pdf]

ELECTRONIC SUPPLEMENTARY INFORMATION

*for*

**A co-crystal of 2-(1'-pyrenyl)-4,4,5,5-tetramethyl-4,5-dihydro-1H-imidazole-3-oxide-1-oxyl with octafluoronaphthalene**

*Handan Akpınar,<sup>a</sup> Joel T. Mague<sup>b</sup> and Paul M. Lahti<sup>\*a</sup>*

<sup>a</sup>Department of Chemistry, University of Massachusetts, Amherst, MA 01003 USA

<sup>b</sup>Department of Chemistry, Tulane University, New Orleans, LA 70118 USA

- Figure S1.** Neat solid ATR-FTIR spectra of PyrNN<sub>2</sub>·OFN·DCM<sub>2</sub>, PyrNN, PyrNN<sub>2</sub>·HFB. pg S1  
F = fluoroarene component, Cl = DCM = dichloromethane.  
Literature spectra for HFB, OFN, DCM.
- Figure S2.** Magnetization versus field data for PyrNN<sub>2</sub>·OFN·DCM<sub>2</sub> at 1.8 K, with pg S4  
Brillouin fitting function for S = 1/2.
- Figure S3.**  $\chi T$  vs  $T$  data with fitting to 1-D chain model for PyrNN<sub>2</sub>·OFN·DCM<sub>2</sub> pg S5  
at 1000 Oe (dc).

**Figure S1.** Neat solid ATR-FTIR spectra of PyrNN<sub>2</sub>·OFN·DCM<sub>2</sub>, PyrNN, PyrNN<sub>2</sub>·HFB.  
(F = fluoroarene component, Cl = DCM = dichloromethane); see also  
literature spectra for HFB, OFN, DCM on pages S2-S3.

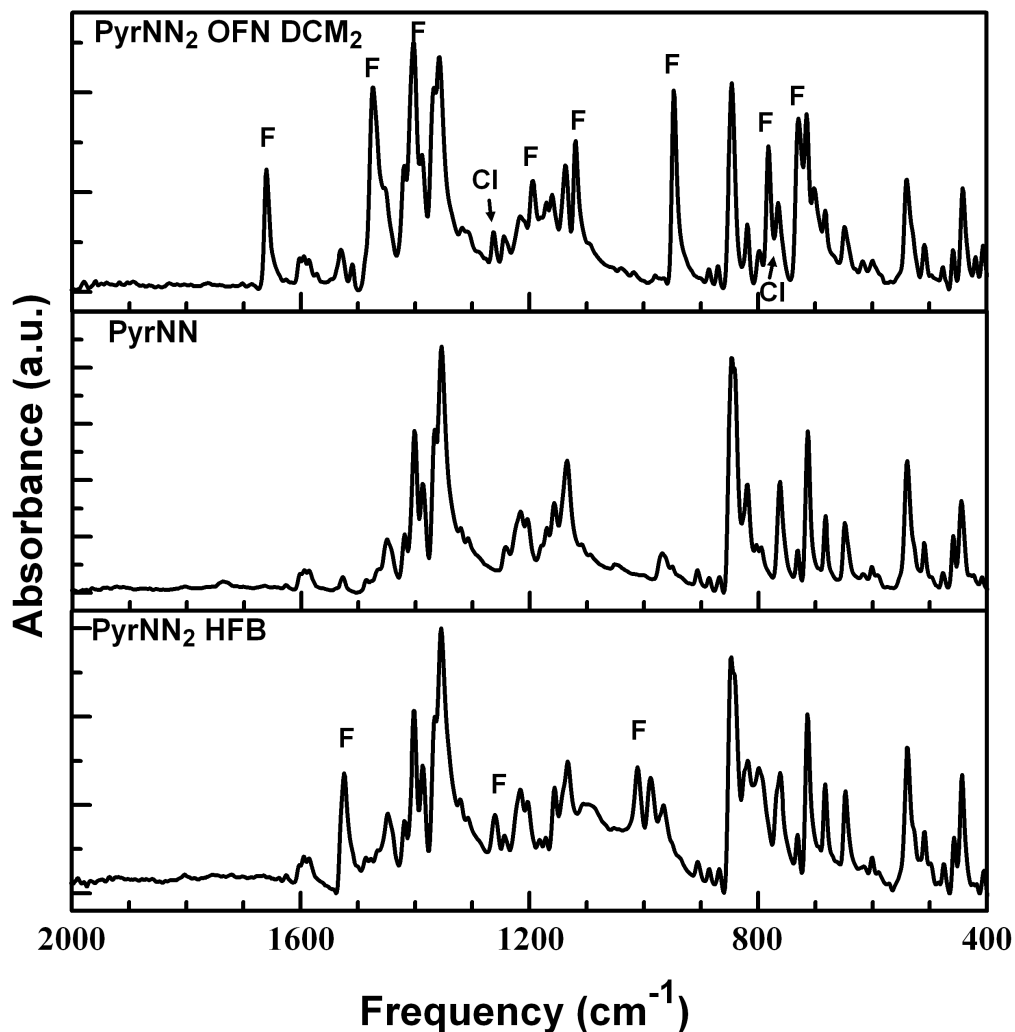

Spectral assignments for peaks above labeled F and Cl are based on spectra for OFN, HFB, DCM from the Spectral Database for Organic Compounds, SDBS, a free site organized by National Institute of Advanced Industrial Science and Technology (AIST), Japan. Access made at <http://riodb01.ibase.aist.go.jp/sdbs/> (National Institute of Advanced Industrial Science and Technology, 7 Aug 2012).

See spectra from the SDBS site on the following two pages.

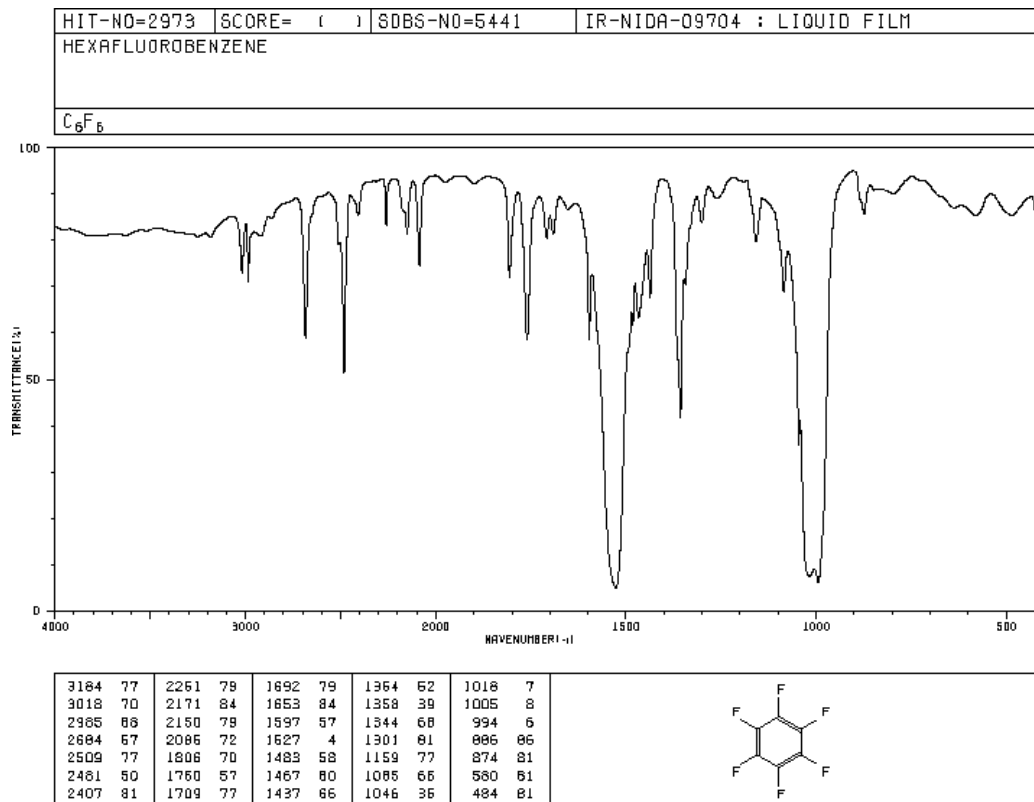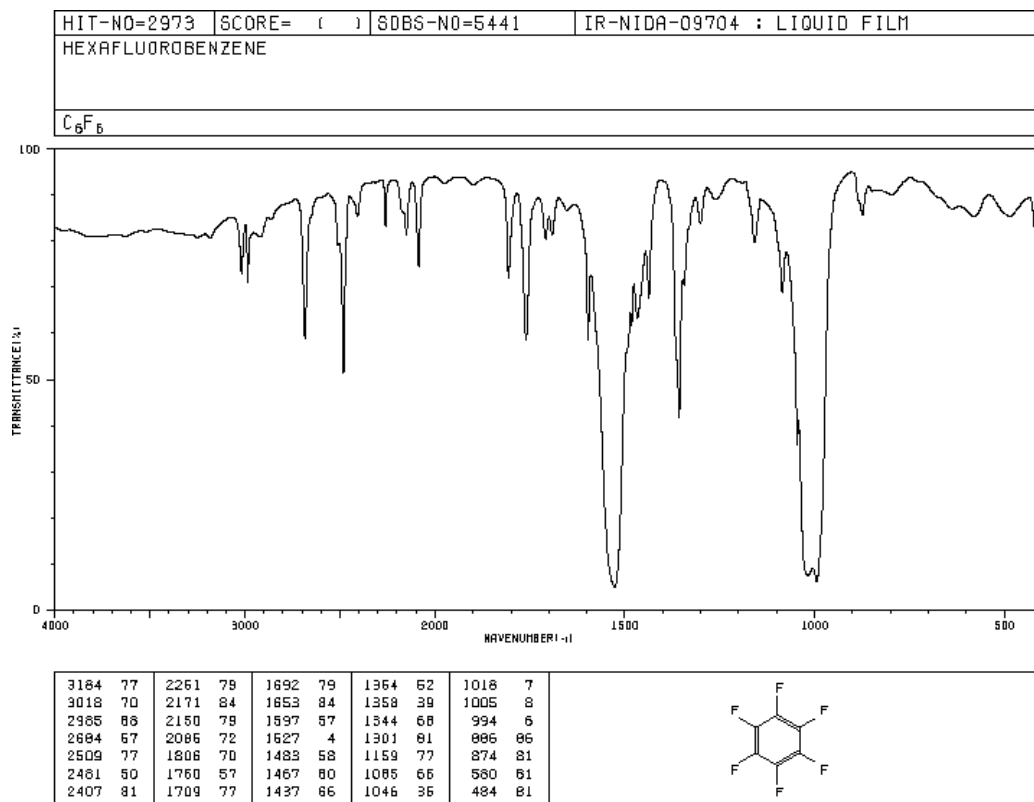

|                                 |            |             |                             |
|---------------------------------|------------|-------------|-----------------------------|
| HIT-NO=1231                     | SCORE= ( ) | SDBS-NO=891 | IR-NIDA-05334 : LIQUID FILM |
| DICHLOROMETHANE                 |            |             |                             |
| CH <sub>2</sub> CL <sub>2</sub> |            |             |                             |

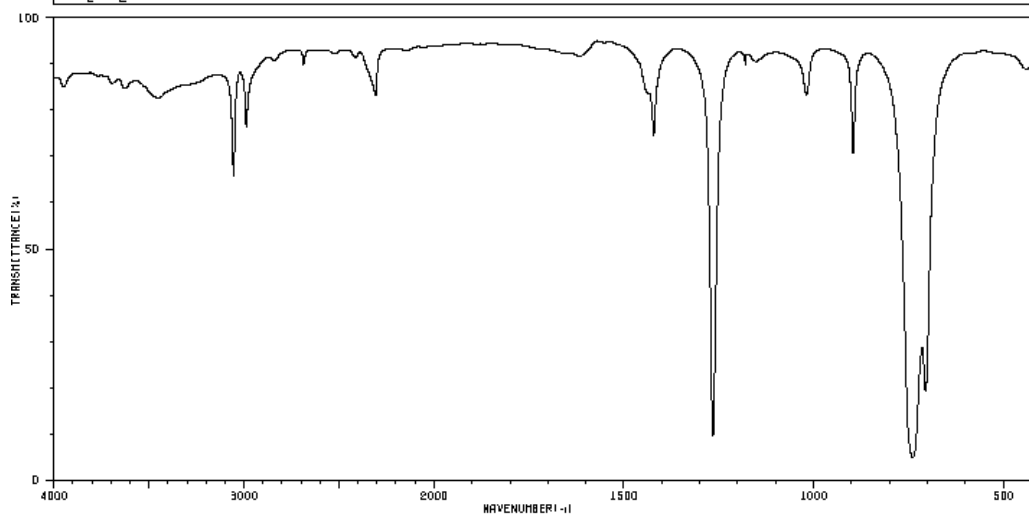

|      |    |      |    |     |    |
|------|----|------|----|-----|----|
| 3949 | 81 | 2307 | 79 | 896 | 68 |
| 3627 | 81 | 1433 | 81 | 739 | 4  |
| 3455 | 79 | 1422 | 72 | 706 | 18 |
| 3445 | 79 | 1266 | 9  |     |    |
| 3055 | 64 | 1181 | 86 |     |    |
| 2987 | 74 | 1028 | 84 |     |    |
| 2887 | 86 | 1019 | 70 |     |    |

|  |
|--|
|  |
|--|

**Figure S2.** Magnetization versus field data for  $\text{PyrNN}_2 \cdot \text{OFN} \cdot \text{DCM}_2$  at 1.8 K, with Brillouin fitting function for  $S = 1/2$ .

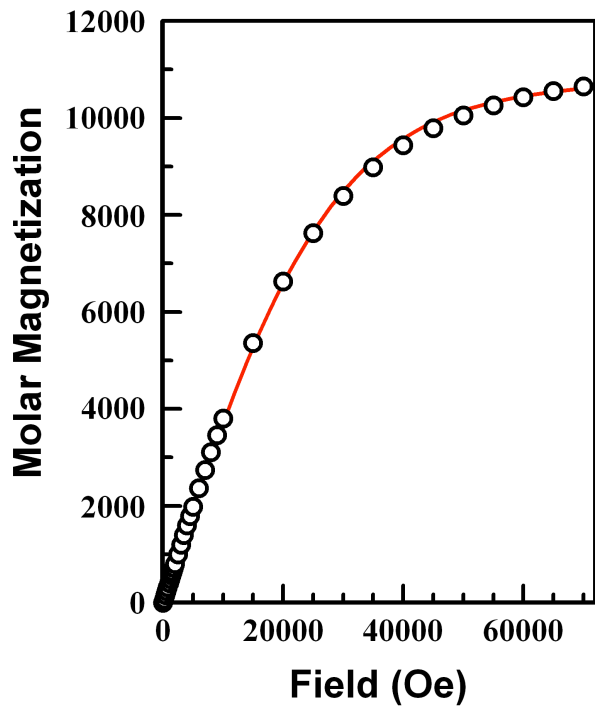

For the theoretical Brillouin curve of magnetization versus field at 1.8 K (solid red line), the following equation was used

$$M = Ng\mu_B \cdot S \cdot B_S(x)$$

$$B_S(x) = \frac{2S+1}{2S} \coth\left(\frac{2S+1}{2S}x\right) - \frac{1}{2S} \coth\left(\frac{x}{2S}\right)$$

$$x = g\mu_B H / k_B T$$

where  $S = 1/2$  and  $g = 1.9$  were used to fit the observed data. In the equation,  $M$  is the molar magnetization,  $H$  is external magnetic field,  $T$  is temperature, and other terms are constants with the usual meanings

**Figure S3.**  $\chi T$  vs  $T$  data with fitting to 1-D chain model for PyrNN<sub>2</sub>·OFN·DCM<sub>2</sub> at 1000 Oe (dc).

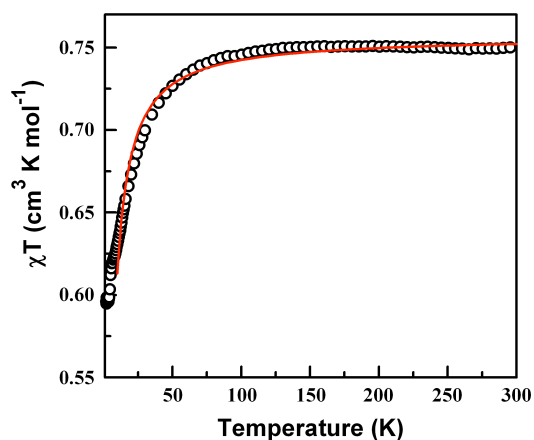

1-D linear Heisenberg chain model for  $S = 1/2$  spin units

From Swank, D. D.; Landee, C. P., Willet, R. D. *Phys. Rev. B*, **1979**, *20*, 2154.

$$\chi T = \frac{Ng^2\beta^2}{4k} \cdot \frac{T}{T-\theta} \cdot \left[ \frac{1 + A \cdot \left(\frac{J}{2kT}\right) + B \cdot \left(\frac{J}{2kT}\right)^2 + C \cdot \left(\frac{J}{2kT}\right)^3 + D \cdot \left(\frac{J}{2kT}\right)^4 + E \cdot \left(\frac{J}{2kT}\right)^5}{1 + F \cdot \left(\frac{J}{2kT}\right) + G \cdot \left(\frac{J}{2kT}\right)^2 + H \cdot \left(\frac{J}{2kT}\right)^3 + I \cdot \left(\frac{J}{2kT}\right)^4} \right]^{2/3} \quad H = -2J \sum_{N=1}^{\infty} S_1 \cdot S_{1+N}$$

$A = 5.7979916$ ,  $B = 16.902653$ ,  $C = 29.376885$ ,  $D = 29.832959$ ,  $E = 14.036918$   
 and  $F = 2.7979916$ ,  $G = 7.0086780$ ,  $H = 8.6538644$ ,  $I = 4.5743114$

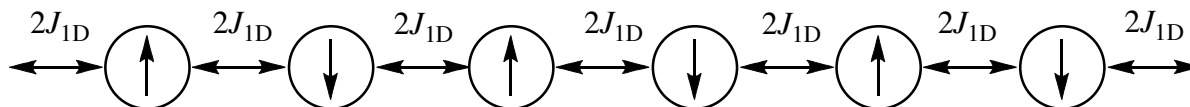

This fit was done for data where  $T > 10$  K; the fitted results are  $J/k = (-)0.96 \pm 0.03$  K,  $g = 2.0093 \pm 0.002$ .
